# Supplementary material for: Quality of life and added value of a tailored palliative care intervention in patients with soft tissue sarcoma undergoing treatment with trabectedin: a multicentre, cluster-randomised trial within the German Interdisciplinary Sarcoma Group (GISG)
Source: PubMed Central journal article supplement — BMJ Open. 2020 Aug 27;10(8):e035546. doi: 10.1136/bmjopen-2019-035546 (PMC7454199; doi:10.1136/bmjopen-2019-035546), 2020-08-27
Supplement: bmjopen-2019-035546.draft_revisions.pdf [file bmjopen-2019-035546.draft_revisions.pdf]

# BMJ Open

BMJ Open is committed to open peer review. As part of this commitment we make the peer review history of every article we publish publicly available.

When an article is published we post the peer reviewers' comments and the authors' responses online. We also post the versions of the paper that were used during peer review. These are the versions that the peer review comments apply to.

The versions of the paper that follow are the versions that were submitted during the peer review process. They are not the versions of record or the final published versions. They should not be cited or distributed as the published version of this manuscript.

BMJ Open is an open access journal and the full, final, typeset and author-corrected version of record of the manuscript is available on our site with no access controls, subscription charges or pay-per-view fees (<http://bmjopen.bmj.com>).

If you have any questions on BMJ Open's open peer review process please email [info.bmjopen@bmj.com](mailto:info.bmjopen@bmj.com)

# BMJ Open

**Quality of life and added value of a tailored palliative care intervention in patients with soft tissue sarcoma undergoing treatment with trabectedin: A multicenter, cluster-randomized trial within the Germany Interdisciplinary Sarcoma Group (GISG)**

|                               |                                                                                                                                                                                                                                                                                                                                                                                                                                                                                                                                                                                                                                                                                                                                                                                                                                                                                                                                                                                                                                                                                                                                                                                                                                                                                                                                                                                                                                                                                                                                                                                                                                                                                                                                                                                                     |
|-------------------------------|-----------------------------------------------------------------------------------------------------------------------------------------------------------------------------------------------------------------------------------------------------------------------------------------------------------------------------------------------------------------------------------------------------------------------------------------------------------------------------------------------------------------------------------------------------------------------------------------------------------------------------------------------------------------------------------------------------------------------------------------------------------------------------------------------------------------------------------------------------------------------------------------------------------------------------------------------------------------------------------------------------------------------------------------------------------------------------------------------------------------------------------------------------------------------------------------------------------------------------------------------------------------------------------------------------------------------------------------------------------------------------------------------------------------------------------------------------------------------------------------------------------------------------------------------------------------------------------------------------------------------------------------------------------------------------------------------------------------------------------------------------------------------------------------------------|
| Journal:                      | <i>BMJ Open</i>                                                                                                                                                                                                                                                                                                                                                                                                                                                                                                                                                                                                                                                                                                                                                                                                                                                                                                                                                                                                                                                                                                                                                                                                                                                                                                                                                                                                                                                                                                                                                                                                                                                                                                                                                                                     |
| Manuscript ID                 | bmjopen-2019-035546                                                                                                                                                                                                                                                                                                                                                                                                                                                                                                                                                                                                                                                                                                                                                                                                                                                                                                                                                                                                                                                                                                                                                                                                                                                                                                                                                                                                                                                                                                                                                                                                                                                                                                                                                                                 |
| Article Type:                 | Original research                                                                                                                                                                                                                                                                                                                                                                                                                                                                                                                                                                                                                                                                                                                                                                                                                                                                                                                                                                                                                                                                                                                                                                                                                                                                                                                                                                                                                                                                                                                                                                                                                                                                                                                                                                                   |
| Date Submitted by the Author: | 12-Nov-2019                                                                                                                                                                                                                                                                                                                                                                                                                                                                                                                                                                                                                                                                                                                                                                                                                                                                                                                                                                                                                                                                                                                                                                                                                                                                                                                                                                                                                                                                                                                                                                                                                                                                                                                                                                                         |
| Complete List of Authors:     | <p>Hentschel, Leopold; University Hospital Carl Gustav Carus, Department of Psychooncology of the University Cancer Center<br/> Richter, Stephan; University Hospital Carl Gustav Carus, Department of Internal Medicine I<br/> Kopp, Hans-Georg; Robert-Bosch-Center of Tumor Diseases, Interdisciplinary Center for Soft-Tissue-Sarcoma, GIST and Bone-Tumor<br/> Kasper, Bernd; University Medical Center Mannheim, Medical Faculty Mannheim, University of Heidelberg, Sarcoma Unit, Interdisciplinary Tumor Center<br/> Kunitz, Annegret; Vivantes Clinic Spandau, Internal Medicine<br/> Grünwald, Viktor ; University Hospital Essen, Interdisciplinary Genitourinary Oncology/West-German Cancer Center<br/> Kessler, Torsten; University Hospital of Münster, Hematology Oncology<br/> Chemnitz, Jens Marcus; ev. Stift St. Martin, Internal Medicine<br/> Pelzer, Uwe; Charité Medical University, Division of Hematology, Oncology and Tumor Immunology<br/> Schuler, Ulrich; University Hospital Carl Gustav Carus, University Palliative Center<br/> Freitag, Janet; University Hospital Carl Gustav Carus, Department of Internal Medicine I<br/> Schilling, Andrea; University Hospital Carl Gustav Carus, Department of Social Work<br/> Hornemann, Beate; University Hospital Carl Gustav Carus, Department of Psychooncology of the University Cancer Center<br/> Arndt, Karin; Das Lebenshaus e.V, Patient Advocacy<br/> Bornhaeuser, Martin; University Hospital Carl Gustav Carus, Department of Internal Medicine I; Deutsches Krebsforschungszentrum, National Center for Tumor Diseases (NCT)<br/> Schuler, Markus Kajo; University Hospital Carl Gustav Carus, Department of Internal Medicine I; HELIOS Hospital Emil von Behring, Department of Internal Medicine II</p> |
| Keywords:                     | Sarcoma < ONCOLOGY, Quality in health care < HEALTH SERVICES ADMINISTRATION & MANAGEMENT, Cancer pain < ONCOLOGY                                                                                                                                                                                                                                                                                                                                                                                                                                                                                                                                                                                                                                                                                                                                                                                                                                                                                                                                                                                                                                                                                                                                                                                                                                                                                                                                                                                                                                                                                                                                                                                                                                                                                    |
|                               |                                                                                                                                                                                                                                                                                                                                                                                                                                                                                                                                                                                                                                                                                                                                                                                                                                                                                                                                                                                                                                                                                                                                                                                                                                                                                                                                                                                                                                                                                                                                                                                                                                                                                                                                                                                                     |

1  
2  
3  
4  
5  
6  
7  
8  
9  
10  
11  
12  
13  
14  
15  
16  
17  
18  
19  
20  
21  
22  
23  
24  
25  
26  
27  
28  
29  
30  
31  
32  
33  
34  
35  
36  
37  
38  
39  
40  
41  
42  
43  
44  
45  
46  
47  
48  
49  
50  
51  
52  
53  
54  
55  
56  
57  
58  
59  
60

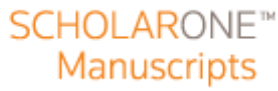

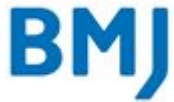

I, the Submitting Author has the right to grant and does grant on behalf of all authors of the Work (as defined in the below author licence), an exclusive licence and/or a non-exclusive licence for contributions from authors who are: i) UK Crown employees; ii) where BMJ has agreed a CC-BY licence shall apply, and/or iii) in accordance with the terms applicable for US Federal Government officers or employees acting as part of their official duties; on a worldwide, perpetual, irrevocable, royalty-free basis to BMJ Publishing Group Ltd ("BMJ") its licensees and where the relevant Journal is co-owned by BMJ to the co-owners of the Journal, to publish the Work in this journal and any other BMJ products and to exploit all rights, as set out in our [licence](#).

The Submitting Author accepts and understands that any supply made under these terms is made by BMJ to the Submitting Author unless you are acting as an employee on behalf of your employer or a postgraduate student of an affiliated institution which is paying any applicable article publishing charge ("APC") for Open Access articles. Where the Submitting Author wishes to make the Work available on an Open Access basis (and intends to pay the relevant APC), the terms of reuse of such Open Access shall be governed by a Creative Commons licence – details of these licences and which [Creative Commons](#) licence will apply to this Work are set out in our licence referred to above.

Other than as permitted in any relevant BMJ Author's Self Archiving Policies, I confirm this Work has not been accepted for publication elsewhere, is not being considered for publication elsewhere and does not duplicate material already published. I confirm all authors consent to publication of this Work and authorise the granting of this licence.

## Original Research

**Quality of life and added value of a tailored palliative care intervention in patients with soft tissue sarcoma undergoing treatment with trabectedin: A multicenter, cluster-randomized trial within the Germany Interdisciplinary Sarcoma Group (GISG)**

Leopold Hentschel<sup>a</sup>, Stephan Richter<sup>b</sup>, Hans-Georg Kopp<sup>c</sup>, Bernd Kasper<sup>d</sup>, Annegret Kunitz<sup>e</sup>, Viktor Grünwald<sup>f</sup>, Torsten Kessler<sup>g</sup>, Jens Marcus Chemnitz<sup>h</sup>, Uwe Pelzer<sup>i</sup>, Ulrich Schuler<sup>j</sup>, Janet Freitag<sup>b</sup>, Andrea Schilling<sup>k</sup>, Beate Hornemann<sup>a</sup>, Karin Arndt<sup>l</sup>, Martin Bornhäuser<sup>b,m</sup>, Markus Kajo Schuler<sup>b,n</sup>

## Author affiliations

- <sup>a</sup> Department of Psychooncology of the University Cancer Center, University Hospital Carl Gustav Carus, Dresden, Germany
- <sup>b</sup> Department of Internal Medicine I, University Hospital Carl Gustav Carus, TU Dresden, Dresden, Germany
- <sup>c</sup> Interdisciplinary Center for Soft-Tissue-Sarcoma, GIST and Bone-Tumor, Robert-Bosch-Center of Tumor Diseases, Stuttgart, Germany
- <sup>d</sup> Sarcoma Unit, Interdisciplinary Tumor Center, University Medical Center, University of Heidelberg, Mannheim, Germany
- <sup>e</sup> Internal Medicine, Vivantes Clinic Spandau, Berlin, Germany
- <sup>f</sup> Interdisciplinary Genitourinary Oncology/West-German Cancer Center, University Hospital Essen, Essen, Germany
- <sup>g</sup> Hematology Oncology, University Hospital of Münster, Münster, Germany
- <sup>h</sup> Internal Medicine, ev. Stift St. Martin, Koblenz, Germany
- <sup>i</sup> Division of Hematology, Oncology and Tumor Immunology, Charité Medical University, Berlin, Germany
- <sup>j</sup> University Palliative Center, University Hospital Carl Gustav Carus, Dresden, Germany
- <sup>k</sup> Department of Social Work, University Hospital Carl Gustav Carus, Dresden, Germany
- <sup>l</sup> Patient Advocacy „Das Lebenshaus e.V.“, Wölfersheim, Germany
- <sup>m</sup> National Center for Tumor Diseases (NCT), Deutsches Krebsforschungszentrum, Heidelberg, Germany
- <sup>n</sup> Department of Internal Medicine II, Helios Hospital Emil von Behring, Berlin, Germany

**Correspondence to:**

**Mr. Leopold Hentschel, Dipl. Psych.**

University Cancer Center, University Hospital Carl Gustav Carus, Fetscherstraße 74, 01307 Dresden, Germany

Phone: +49-351-458-7120

E-mail: [Leopold.Hentschel@uniklinikum-dresden.de](mailto:Leopold.Hentschel@uniklinikum-dresden.de)

## ABSTRACT

**Objectives:** The choice of drug treatment in advanced soft tissue sarcoma (STS) continues to be a challenge regarding efficacy, quality of life (QoL) and toxicity. Unlike other cancer types, where integrating patient-reported outcomes (PRO) has proven to be beneficial for QoL, there is no such evidence in patients with STS yet.

**Design:** This cluster-randomized multi-center YonLife study explored the effect of a comprehensive supportive intervention on QoL in patients with advanced STS undergoing treatment with trabectedin.

**Participants:** Patients from seven hospitals were randomized either to the control cluster (CC with electronic assessment of PRO [ePRO] only) or interventional cluster (IC including ePRO and four-step assessment for supportive palliative care).

**Primary and secondary outcome measures:** The explorative primary endpoint was the change of FACT-G total score after nine weeks. Outcomes included measures of QoL (FACT-G), symptoms (MDASI), anxiety and depression (HADS), pain intensity and interference (BPI), and survival assessment.

**Results:** After nine weeks of treatment QoL declined less in the IC ( $\Delta$  FACT-G total score: -2.4) as compared to CC ( $\Delta$  FACT-G total score: -3.9;  $P=0.765$ ). The effect size of the intervention on the FACT-G score was  $d=0.269$  (small effect). Overall mean survival was longer in IC (648 days) than in CC (389 days,  $P=0.110$ ). Progression-free survival did not differ in both clusters (IC 249 days and CC (232 days,  $P=0.899$ ). QoL was predicted by symptom severity, symptom interference, depression and anxiety; whereas age, gender, performance status, patient-satisfaction and anorexia/cachexia

1  
2  
3 showed no influence.  
4

5 **Conclusion:** This trial adds knowledge and understanding about PRO in advanced  
6 STS patients. Unlike previous work, it is the first trial that applies an electronic PRO-  
7 assessment in a multi-center approach for a tailored intervention of STS patients.  
8  
9  
10 Therefore, our findings can serve as the cornerstone for future research.  
11  
12  
13

14 **Trial registration:** ClinicalTrials.gov Identifier: NCT02204111.  
15  
16  
17  
18  
19  
20  
21  
22  
23  
24  
25  
26  
27  
28  
29  
30  
31  
32  
33  
34  
35  
36  
37  
38  
39  
40  
41  
42  
43  
44  
45  
46  
47  
48  
49  
50  
51  
52  
53  
54  
55  
56  
57  
58  
59  
60

For peer review only

## STRENGTHS AND LIMITATIONS OF THIS STUDY

- YonLife explores the efficacy of a patient-directed intervention in sarcoma based on electronic patient-reported outcomes (ePRO)
- Use of ePRO assessment is feasible in a multi-center study
- ePRO-based intervention shows a favorable trend as improves important outcomes of palliative care
- Main limitation of YonLife was its study design/sample size, set for an explorative purpose only and use of very generic instruments for quality of life (QoL) evaluation
- Research of sarcoma-specific QoL-tools is warranted and a randomized controlled trial needs to confirm trends

## KEYWORDS

Sarcoma, quality of life, patient-reported outcomes, trabectedin



## INTRODUCTION

Although systemic treatment options in advanced soft tissue sarcoma (STS) have evolved in the past, corresponding toxicity and the varying degrees of long-lasting and cumulative adverse drug reactions cut down the overall clinical benefit and patients' quality of life (QoL). The burden of disease is high, even in patients who experience a long-lasting progression-free survival (PFS). Overall, QoL in sarcoma-patients is more impaired than in the general population<sup>1, 2</sup>, but comparable to patients with more frequent cancer diseases.<sup>3</sup> Mental problems such as distress, depression and anxiety are paramount in this disease.<sup>4, 5</sup>

Treatment algorithms for STS beyond first-line treatment do not show superiority between one regimen and another.<sup>6</sup> On the other hand, there are distinct and drug-specific safety profiles. Therefore, the choice of which regimen should be applied becomes a matter of debate within the patient-doctor consultation with considerations comprising preferences, personal beliefs and convenience.<sup>7</sup> Consequently, it is important to assess the treatment effectiveness in two ways. First, in terms of tumor burden as an outcome (e.g., PFS or overall survival), and, secondly, in terms of symptoms and toxicities as assessed by patient-reported outcomes (PRO). As an individual might experience improvement in symptoms while a treatment is not superior on a group-level, appropriate strategies to evaluate the individual patient benefit need to be developed. Especially, if there is no superiority in survival, further outcomes should be considered, such as evaluation of the time to deterioration.<sup>8</sup>

Assessment and interventions based on PRO have been proven to yield beneficial outcomes in various settings and entities.<sup>9-14</sup> Nevertheless, PRO assessment

1  
2  
3 in patients treated for STS struggle with serious barriers such as a relatively small  
4 patient population and the fact that no STS-specific QoL-questionnaire is available.<sup>2, 15</sup>  
5  
6 Considering that merely assessing PRO might not be beneficial<sup>16</sup>, we believe it should  
7  
8 be accompanied by additional interventions like nurse-led patient education, self-care  
9  
10 support or a multi-professional expert panel.<sup>17</sup> Despite the increasing knowledge about  
11  
12 benefits and assessment of PRO in general and the high symptom-burden of patients  
13  
14 suffering from advanced STS, the proof of concept for such interventions remains open.  
15  
16 Therefore, the YonLife study was designed to evaluate the value and efficacy of a  
17  
18 tailored, patient-directed palliative intervention based on various domains of QoL and to  
19  
20 explore effect sizes using different PRO instruments in patients with advanced STS  
21  
22 undergoing treatment with trabectedin.  
23  
24  
25  
26  
27  
28  
29  
30  
31  
32  
33  
34  
35  
36  
37  
38  
39  
40  
41  
42  
43  
44  
45  
46  
47  
48  
49  
50  
51  
52  
53  
54  
55  
56  
57  
58  
59  
60

## METHODS

### Patients

Adult patients suffering from advanced or metastatic STS that had just started or were currently under treatment with trabectedin (Yondelis®) 1.5 mg/m<sup>2</sup>, given as a 24-hour intravenous infusion every three weeks and who received at least one dose, were included in this study. Physician-assessed life expectancy had to be at least six months and Eastern Cooperative Oncology Group (ECOG)-performance status score had to be  $\geq 2$ . All study procedures were conducted in accordance with the ethical standards as laid down in the 1964 Declaration of Helsinki and its later amendments. The YonLife trial was approved by the Ethics Committee of the University Hospital Carl Gustav Carus in Dresden on 16 June 2014 (EK241062014), and all participating centres have obtained the approval of the local ethics committee before patient enrolment. All patients will have to provide written informed consent before inclusion in the study.

### Patient and public involvement

We appreciated all patients who participated in the study and contributed their personal information to the research. All patients and the public, however, were not involved in the design or planning of the study.

### Trial design

Full details of YonLife trial (ClinicalTrials.gov Identifier: NCT02204111) have been reported earlier.<sup>18</sup> Briefly, the YonLife trial was designed as a cluster-randomized,

1  
2  
3 explorative proof-of-concept study. Seven German centers were cluster-randomized in a  
4  
5 1:1 ratio. The center where supportive care recommendations were gathered served as  
6  
7 a reference center. Patients randomized to the control cluster (CC) were assessed using  
8  
9 only electronic PRO-assessment without feedback to treatment team. Patients treated  
10  
11 in the interventional cluster (IC) received a comprehensive four-step evaluation  
12  
13 comprising: 1) PRO were assessed electronically via handheld tablet-PCs at each visit;  
14  
15 2) a case vignette was created based on the obtained PRO and clinical data at baseline  
16  
17 (V1); 3) supportive care recommendations were addressed during discussion about  
18  
19 patients' vignettes in a multi-professional expert panel; and 4) these treatment-  
20  
21 suggestions as well as graphical representation of obtained PRO were provided to the  
22  
23 treating physicians in the interventional center. Clinicians in the IC had the opportunity to  
24  
25 discuss the graphical presentation with their patients and comply with the treatment  
26  
27 suggestions. The expert panel consisted of experts in the field of oncology, palliative  
28  
29 care, social work, nursing, psycho-oncology as well as a patient advocate.  
30  
31  
32  
33  
34  
35  
36

### 37 **Outcome measures**

38  
39 The primary outcome explored the changes of patients QoL in IC and CC after nine  
40  
41 weeks (i.e. between visit 1 [V1] and visit 4 [V4]) of treatment as measured with the  
42  
43 Functional Assessment for Cancer Therapy (FACT-G) total score. The FACT-G is a  
44  
45 PRO measure used to assess health-related QoL in patients undergoing cancer therapy  
46  
47 as a total sum score comprising several functional domains of QoL ranging from 0 to  
48  
49 108.<sup>19</sup> Furthermore, we evaluated the number of patients with a clinical improvement  
50  
51 between V1 and V4. This equals a change in the FACT-G total score of at least 3.3  
52  
53  
54  
55

1  
2  
3 points in order to represent a minimal clinical important difference (MCID). Additionally,  
4 the time until QoL deterioration (TUD) was also assessed as a change of at least 3.3  
5 points between V1 and V4 as defined by King *et al.*<sup>20</sup>  
6  
7  
8  
9

10 Secondary outcomes were the subscales of the FACT-G questionnaire: physical  
11 (range: 0-28), emotional (range: 0-24), functional (range: 0-28), and social well-being  
12 (range: 0-28) explored at V4 and during follow up (i.e. V7)<sup>19</sup>. Additionally, the effect size  
13 of the intervention was measured as COHEN's d test by measuring the difference  
14 between two means.<sup>21</sup> The M.D. Anderson Symptom Inventory (MDASI)<sup>22</sup> was used to  
15 measure the severity of 13 cancer-related symptoms and their impact on six dimensions  
16 of daily life. Psychological distress was evaluated by the Hospital Anxiety and  
17 Depression scale (HADS).<sup>23</sup> It provided a total sum score (range: 0-42) and two self-  
18 rating subscales for anxiety and depression (range: 0-21). HADS also identified clinically  
19 relevant cases of anxiety and depression using pre-determined cut-off scores.<sup>24</sup> The  
20 Functional Assessment of Anorexia/Cachexia Therapy questionnaire (FAACT)  
21 measured the impact of cachexia and anorexia on patients' QoL.<sup>25</sup> Finally, the Brief Pain  
22 Inventory (BPI) in a scale range from 0-10 measured the intensity of pain and pain-  
23 related interference.<sup>26</sup>  
24  
25  
26  
27  
28  
29  
30  
31  
32  
33  
34  
35  
36  
37  
38  
39  
40  
41  
42  
43  
44

## 45 **Statistical considerations**

46  
47 The patients sample size was calculated for an explorative purpose. We assumed the  
48 superiority of our intervention concerning FACT-G total score. Type I error was set to  
49  $\alpha=0.05$  (one-sided), with a statistical power of  $1-\beta=0.80$  and a medium effect<sup>20</sup> between  
50 the groups in  $FACT-G=15$ , with an estimated standard deviation (SD) of  $\sigma=17$ <sup>27</sup> and a  
51  
52  
53  
54  
55

1  
2  
3 conservatively estimated intra-cluster-correlation coefficient of  $p=0.1$ . This calculation  
4  
5 resulted in a cluster size of 33 patients (~11 patients per center). Additionally, 11  
6  
7 patients were recruited in the reference center, for a total of 77 patients.  
8  
9

10 The Full Analysis Set (FAS) comprised all patients included in the study and  
11  
12 allocated to a treatment group irrespective of their compliance with the planned course  
13  
14 of treatment (intention-to-treat principle). Analyses of efficacy endpoints were performed  
15  
16 on the per-protocol analysis set (PPS) defined as the subset of patients of the FAS who  
17  
18 have provided complete data at the first (V1) and last visit (V4) and who had no major  
19  
20 protocol deviations.  
21  
22

23  
24 Survival was assessed as means of PFS and overall survival (OS). The PFS and  
25  
26 OS analyses were defined as the time interval from the first administration of trabectedin  
27  
28 to the earliest date of disease progression or death, regardless of cause (whichever  
29  
30 occurred first) for PFS, whereas OS was defined as the time between the start of  
31  
32 trabectedin and patient death from any cause. Patients were censored after the  
33  
34 discontinuation of their study participation. Means of PFS and OS are reported to  
35  
36 provide the ability to describe and compare the clusters, as median value of OS is not  
37  
38 defined for confidence interval (CI) within the observation period of this study.  
39  
40

41  
42 Mann-Whitney-U, Fisher-exact test, and Chi-squared test were used for the  
43  
44 detection of possible differences concerning demographics. T-test was applied to detect  
45  
46 possible differences between metric outcomes, whereas linear univariate and  
47  
48 multivariate regression were calculated to identify determinants of QoL at V4.  
49  
50  
51  
52  
53  
54  
55  
56

## RESULTS

Between September 2014 and March 2018 80 patients in seven sites were screened for study participation. The full analysis set encompasses 79 patients, as one patient had to be excluded from analysis due to lack of required data. Mean age was 58 years (range 22 to 86). Leiomyosarcoma histology was the most frequent ( $n=32$ ), followed by liposarcoma ( $n=23$ ) (Table 1).

**Table 1. Patient characteristic at baseline**

|                                                          | <b>Interventional cluster (IC),<br/>N=38</b> | <b>Control cluster (CC),<br/>N=29</b> | <b>Reference Center (RF),<br/>N=12</b> | <b>Full Analysis Set<br/>N=79</b> |
|----------------------------------------------------------|----------------------------------------------|---------------------------------------|----------------------------------------|-----------------------------------|
| <b>Gender</b>                                            |                                              |                                       |                                        |                                   |
| <b>Male</b>                                              | 20                                           | 15                                    | 6                                      | 41                                |
| <b>Female</b>                                            | 18                                           | 14                                    | 6                                      | 38                                |
| <b>Age</b>                                               |                                              |                                       |                                        |                                   |
| <b>Mean (SD)</b>                                         | 58 (12)                                      | 56 (15)                               | 63 (16)                                | 58 (14)                           |
| <b>Range (years)</b>                                     | 38-87                                        | 22-80                                 | 34 - 82                                | 22 - 87                           |
| <b>Tumor histology</b>                                   |                                              |                                       |                                        |                                   |
| <b>Leiomyosarcoma</b>                                    | 19                                           | 5                                     | 5                                      | 29                                |
| <b>Liposarcoma</b>                                       | 6                                            | 11                                    | 3                                      | 20                                |
| <b>Others*</b>                                           | 13                                           | 12                                    | 4                                      | 29                                |
| <b>missing</b>                                           | 0                                            | 1                                     | 0                                      | 1                                 |
| <b>ECOG PS</b>                                           |                                              |                                       |                                        |                                   |
| <b>0</b>                                                 | 20                                           | 14                                    | 5                                      | 39                                |
| <b>1</b>                                                 | 15                                           | 13                                    | 7                                      | 35                                |
| <b>2</b>                                                 | 3                                            | 0                                     | 0                                      | 3                                 |
| <b>Missing</b>                                           | 0                                            | 2                                     | 0                                      | 2                                 |
| <b>Number of previous cycles of trabectedin</b>          |                                              |                                       |                                        |                                   |
| <b>Median</b>                                            | 0                                            | 1                                     | 1                                      | 1                                 |
| <b>Range</b>                                             | 0-15                                         | 0-17                                  | 0-11                                   | 0-17                              |
| <b>Number of previous cycles of another chemotherapy</b> |                                              |                                       |                                        |                                   |
| <b>Median</b>                                            | 1.5                                          | 1                                     | 2                                      | 2                                 |
| <b>Range</b>                                             | 0 - 6                                        | 0 - 5                                 | 1-4                                    | 0-6                               |

\*All subtypes occurring less than four times were merged into this category.

ECOG PS, Eastern Cooperative Oncology Group performance status; SD, standard deviation.

## Primary Outcome

After nine weeks at V4, FACT-G was higher in IC ( $\Delta$  FACT-G total score: -2.4) as

compared to the CC ( $\Delta$  FACT-G total score: -3.9;  $P=0.765$ ) (Table 2). The effect size of the intervention on the FACT-G score was  $d=0.269$  (small effect).

**Table 2. Change scores after 9 weeks of treatment**

|                                     | Mean change from baseline (V1) to 9 weeks (V4) |                      |         | Interventional trend |
|-------------------------------------|------------------------------------------------|----------------------|---------|----------------------|
|                                     | Interventional cluster (IC)                    | Control cluster (CC) | P-value |                      |
| <b>FACT-G total</b>                 | -2.4                                           | -3.9                 | 0.955   | Beneficial           |
| <b>FACT-G physical well-being</b>   | -1.2                                           | -2.2                 | 0.722   | Beneficial           |
| <b>FACT-G social well-being</b>     | -1.6                                           | -0.3                 | 0.193   | Adverse              |
| <b>FACT-G emotional well-being</b>  | 0.9                                            | -0.1                 | 0.561   | Beneficial           |
| <b>FACT-G functional well-being</b> | -0.5                                           | -1.3                 | 0.536   | Beneficial           |
| <b>HADS depression</b>              | 0.3                                            | 0.2                  | 0.419   | Equivalent           |
| <b>HADS anxiety</b>                 | 0.3                                            | -0.8                 | 0.710   | Adverse              |
| <b>BPI average pain</b>             | 0.6                                            | 0.2                  | 0.788   | Adverse              |
| <b>BPI pain interference</b>        | 0.4                                            | 0.1                  | 0.679   | Adverse              |
| <b>MDASI, symptom severity</b>      | 0.7                                            | 0.2                  | 0.442   | Adverse              |
| <b>MDASI, symptom interference</b>  | 1.2                                            | 0.8                  | 0.667   | Adverse              |

BPI, Brief Pain Inventory; FACT-G, Functional Assessment for Cancer Therapy; HADS, Hospital Anxiety and Depression scale; MDASI, The M.D. Anderson Symptom Inventory; V, visit.

Figure 1 and Table 3 depicts absolute FACT-scores trajectories over time. The number of patients experiencing a MCID was equal in both groups (IC: 44% and CC: 43%). The median TUD differed slightly between IC (25 days) and IC (22 days,  $P=0.927$ ).

**Table 3. Absolute FACT-scores at each assessment time**

| Questionnaire                         | Visit | Interventional cluster (IC) |      | Control cluster (CC) |      | P-value | Total |      |
|---------------------------------------|-------|-----------------------------|------|----------------------|------|---------|-------|------|
|                                       |       | Mean                        | SD   | Mean                 | SD   |         | Mean  | SD   |
| <b>FACT-G total score</b>             | V1    | 74.9                        | 14.8 | 73.3                 | 11.6 | 0.788   | 74.2  | 13.0 |
|                                       | V2    | 76.8                        | 15.1 | 68.2                 | 16.6 | 0.145   | 73.1  | 16.1 |
|                                       | V3    | 72.0                        | 16.7 | 70.7                 | 11.8 | 0.708   | 72.1  | 14.3 |
|                                       | V4    | 73.9                        | 15.2 | 69.4                 | 18.4 | 0.512   | 71.6  | 16.2 |
|                                       | V5    | 80.2                        | 10.8 | 74.9                 | 14.8 | 0.588   | 77.3  | 14.8 |
|                                       | V6    | 76.6                        | 12.8 | 80.2                 | 11.8 | 0.402   | 77.2  | 13.2 |
|                                       | V7    | 79.1                        | 16.4 | 73.0                 | 8.5  | 0.582   | 75.7  | 14.9 |
| <b>FACT physical well-being (PWB)</b> | V1    | 21.0                        | 5.3  | 21.2                 | 3.7  | 0.872   | 21.2  | 4.5  |
|                                       | V2    | 21.4                        | 5.0  | 18.7                 | 5.4  | 0.168   | 20.3  | 5.2  |
|                                       | V3    | 19.3                        | 5.6  | 20.2                 | 3.7  | 0.890   | 20.3  | 4.9  |
|                                       | V4    | 20.2                        | 6.6  | 19.0                 | 6.1  | 0.639   | 19.6  | 6.1  |



|    |                                         |      |     |      |     |       |      |     |
|----|-----------------------------------------|------|-----|------|-----|-------|------|-----|
| 3  | V5                                      | 22.6 | 3.4 | 20.9 | 4.5 | 0.971 | 21.8 | 4.0 |
| 4  | V6                                      | 22.0 | 4.4 | 22.1 | 3.4 | 1.000 | 22.0 | 4.2 |
| 5  | V7                                      | 20.8 | 7.0 | 18.0 | 7.1 | 0.582 | 19.4 | 6.4 |
| 6  | <b>FACT social well-being (SWB)</b>     |      |     |      |     |       |      |     |
| 7  | V1                                      | 20.3 | 5.4 | 18.6 | 5.2 | 0.304 | 19.8 | 5.2 |
| 8  | V2                                      | 20.5 | 4.6 | 17.7 | 6.0 | 0.251 | 19.6 | 5.2 |
| 9  | V3                                      | 19.5 | 4.6 | 17.9 | 4.6 | 0.395 | 19.2 | 4.5 |
| 10 | V4                                      | 19.2 | 5.0 | 18.3 | 6.2 | 0.896 | 19.3 | 5.3 |
| 11 | V5                                      | 20.9 | 3.9 | 20.4 | 5.1 | 0.913 | 20.5 | 4.5 |
| 12 | V6                                      | 20.7 | 2.7 | 22.2 | 3.2 | 0.188 | 21.2 | 3.2 |
| 13 | V7                                      | 21.8 | 3.1 | 21.0 | 1.4 | 0.727 | 21.3 | 3.8 |
| 14 | <b>FACT emotional well-being (EWB)</b>  |      |     |      |     |       |      |     |
| 15 | V1                                      | 16.2 | 3.8 | 16.7 | 2.6 | 0.986 | 16.0 | 3.3 |
| 16 | V2                                      | 17.0 | 3.3 | 16.6 | 2.6 | 0.667 | 16.5 | 3.7 |
| 17 | V3                                      | 17.0 | 4.0 | 17.7 | 3.1 | 0.767 | 16.7 | 3.8 |
| 18 | V4                                      | 17.4 | 2.7 | 16.6 | 3.3 | 0.377 | 16.6 | 3.3 |
| 19 | V5                                      | 17.7 | 2.2 | 17.1 | 1.2 | 0.393 | 17.1 | 2.3 |
| 20 | V6                                      | 16.8 | 3.4 | 16.6 | 3.2 | 0.570 | 16.1 | 3.6 |
| 21 | V7                                      | 17.3 | 2.4 | 16.0 | 1.4 | 0.327 | 16.9 | 3.1 |
| 22 | <b>FACT functional well-being (FWB)</b> |      |     |      |     |       |      |     |
| 23 | V1                                      | 17.3 | 5.3 | 16.8 | 4.3 | 0.900 | 17.2 | 4.5 |
| 24 | V2                                      | 17.9 | 5.4 | 15.1 | 5.9 | 0.319 | 16.7 | 5.4 |
| 25 | V3                                      | 16.1 | 6.4 | 14.9 | 4.5 | 0.679 | 16.0 | 5.4 |
| 26 | V4                                      | 17.1 | 5.4 | 15.5 | 5.7 | 0.512 | 16.2 | 5.4 |
| 27 | V5                                      | 18.8 | 4.6 | 16.4 | 5.3 | 0.485 | 17.9 | 4.5 |
| 28 | V6                                      | 17.1 | 6.1 | 19.3 | 3.8 | 0.441 | 17.9 | 5.4 |
| 29 | V7                                      | 19.2 | 7.0 | 18.0 | 1.4 | 0.909 | 18.0 | 6.0 |

FACT-G, Functional Assessment for Cancer Therapy; SD, standard deviation; V, visit.

## Secondary Outcomes

Regarding the change of QoL between V1 and V4 (as well as during follow up V7), there was a beneficial impact of the patient-tailored evaluation in IC in all FACT-G subscales except for social well-being (Figure 1). There was less decline in physical well-being subscale in IC ( $\Delta$  FACT-G PWB: -1.2) than in CC ( $\Delta$  FACT-G PWB: -2.2;  $P=0.926$ ) (Table 2). Emotional well-being subscale improved slightly in IC ( $\Delta$  FACT-G EWB: 0.9) and remained almost stable in CC ( $\Delta$  FACT-G EWB:-0.1;  $P=0.561$ ). Functional well-being subscale declined less in IC ( $\Delta$  FACT-G FWB: -0.5) than in CC ( $\Delta$  FACT-G FWB: -1.3;  $P=0.536$ ). Lastly, social well-being subscale remained almost stable ( $\Delta$  FACT-G SWB:-0.2) in CC while decreasing in IC ( $\Delta$  FACT-G SWB: -1.6;  $P=0.952$ ). There was no

significant difference among both cohorts in other domains of PRO (MDASI, FAACT, HADS and BPI scales) (Table 2 and Table 4).

Overall mean OS was longer in IC than in CC (648 vs. 389 days) without reaching a statistical significance ( $P=0.110$ ), while means of PFS were almost identical in IC and CC (249 vs. 232 days;  $P=0.899$ ).

**Table 4.** Absolute scores of secondary outcomes

| Questionnaire             | Visit | Interventional cluster (IC) |      | Control cluster (CC) |      | P-value | Total |      |
|---------------------------|-------|-----------------------------|------|----------------------|------|---------|-------|------|
|                           |       | Mean                        | SD   | Mean                 | SD   |         | Mean  | SD   |
| <b>FAACT score</b>        |       |                             |      |                      |      |         |       |      |
|                           | V1    | 37,9                        | 4,3  | 39,1                 | 5,4  | 0,439   | 38,3  | 4,8  |
|                           | V2    | 37,9                        | 5,2  | 39,1                 | 6,0  | 0,398   | 38,7  | 5,3  |
|                           | V3    | 37,4                        | 5,5  | 37,9                 | 5,2  | 0,828   | 38,1  | 5,0  |
|                           | V4    | 35,0                        | 6,7  | 38,6                 | 7,1  | 0,099   | 36,9  | 6,4  |
|                           | V5    | 39,3                        | 4,5  | 37,3                 | 8,9  | 0,877   | 37,7  | 6,2  |
|                           | V6    | 38,3                        | 4,7  | 40,3                 | 4,3  | 0,365   | 38,6  | 4,8  |
|                           | V7    | 33,0                        | 11,8 | 34,0                 | 14,1 | 1,000   | 33,2  | 10,0 |
| <b>MDASI severity</b>     |       |                             |      |                      |      |         |       |      |
|                           | V1    | 1,9                         | 1,5  | 1,9                  | 1,5  | 1,000   | 2,0   | 1,4  |
|                           | V2    | 2,0                         | 1,5  | 2,5                  | 1,6  | 0,464   | 2,2   | 1,6  |
|                           | V3    | 2,5                         | 1,4  | 2,0                  | 1,0  | 0,417   | 2,2   | 1,3  |
|                           | V4    | 2,4                         | 1,6  | 2,1                  | 1,6  | 0,561   | 2,2   | 1,6  |
|                           | V5    | 2,0                         | 0,9  | 2,7                  | 1,6  | 0,588   | 2,1   | 1,3  |
|                           | V6    | 2,1                         | 1,2  | 2,4                  | 1,7  | 0,868   | 2,2   | 1,5  |
|                           | V7    | 2,5                         | 1,6  | 2,2                  | 1,7  | 1,000   | 2,6   | 1,9  |
| <b>MDASI interference</b> |       |                             |      |                      |      |         |       |      |
|                           | V1    | 1,9                         | 2,1  | 2,2                  | 1,6  | 0,397   | 2,1   | 2,0  |
|                           | V2    | 2,2                         | 2,0  | 3,4                  | 1,9  | 0,065   | 2,6   | 2,0  |
|                           | V3    | 2,8                         | 2,3  | 2,9                  | 1,6  | 0,798   | 2,8   | 2,0  |
|                           | V4    | 3,0                         | 2,1  | 2,9                  | 2,2  | 0,837   | 2,9   | 2,2  |
|                           | V5    | 2,2                         | 1,8  | 2,8                  | 2,3  | 0,588   | 2,2   | 1,8  |
|                           | V6    | 2,3                         | 1,7  | 2,9                  | 1,9  | 0,570   | 2,4   | 1,8  |
|                           | V7    | 0,6                         | 2,6  | 3,3                  | 3,1  | 1,000   | 2,9   | 2,6  |

FAACT, Functional Assessment of Anorexia/Cachexia Therapy questionnaire; MDASI, The M.D. Anderson Symptom Inventory; SD, standard deviation; V, visit.

### QoL-Prediction

Univariate regressions revealed that FACT-G total score was determined by each of the following: symptom severity, symptom interference, depression and anxiety. No

influence on FACT-G total score at the primary endpoint was found for age, gender, ECOG performance status, patient-satisfaction, anorexia and cachexia (Table 5).

**Table 5.** Univariate regression of parameters at baseline (V1) and after nine weeks (V4) over all groups

|                             | R <sup>2</sup> | P-value | b1   |
|-----------------------------|----------------|---------|------|
| <b>Gender</b>               | 0.05           | 0.154   | 7.5  |
| <b>Age</b>                  | 0.04           | 0.228   | -0.2 |
| <b>ECOG</b>                 | 0.01           | 0.509   | -3.2 |
| <b>Tumor stadium</b>        | 0.03           | 0.284   | -1.8 |
| <b>Symptom severity</b>     | 0.31           | 0.0     | -6.6 |
| <b>Symptom interference</b> | 0.16           | 0.011   | -3.4 |
| <b>Depression</b>           | 0.35           | 0.0     | -2.7 |
| <b>Anxiety</b>              | 0.12           | 0.034   | -1.4 |
| <b>Patient Satisfaction</b> | 0.02           | 0.451   | 3.0  |
| <b>Anorexia/Cachexia</b>    | 0.06           | 0.143   | 0.8  |

R<sup>2</sup> – coefficient of determination; b1 – regression coefficient

## DISCUSSION

To the best of our knowledge, this is the first randomized trial using a patient-directed supportive care intervention to improve QoL and other PRO in sarcoma patients. We observed a trend in favor of the intervention considering the primary endpoint (FACT-G sum score) and other secondary outcomes (physical well-being and emotional well-being). Not surprisingly and due to the character of palliative disease, absolute numbers in FACT-G-score decline over time. However, in this study the cumulative score representing several domains of QoL was clearly in favor of the intervention although this trend fails to reach statistical significance. Such an outcome was quite expected as this study was powered for an explorative purpose only as there was no previous experience with a tailored intervention in this setting. Applying outcome measures beyond mere statistical significance might be crucial in order to describe patients' benefits in studies with rare entities. The intervention applied in this trial seems to be beneficial in reducing the decline in overall QoL. On the other side, MCID and TUD assessment, which have been widely adopted in several trials focusing on QoL<sup>8, 28</sup>, in our study slightly differed between both groups.

Our study has several limitations. As no preceding studies that incorporate a PRO-based individualized intervention still exist, our study design and the sample size were set only for an explorative purpose. Therefore, results were determined to fail statistical significance and should be interpreted with caution. Furthermore, a sarcoma-specific QoL-measure is still missing, while the FACT-G is a generic instrument which might not cover syndromes and aspects specific for sarcoma patients. On the other hand, to overcome the obstacles of limited statistical power, we applied measures of

1  
2  
3 clinical rather than statistical importance such as the MCID or TUD, which might be even  
4 more important to clinicians in daily practice. Effect sizes are now available for  
5 calculating sample sizes in larger confirmatory trials.  
6  
7  
8

9  
10 There are still many unanswered questions regarding comprehensive QoL  
11 interventions in general. During the past years, several reports with different designs  
12 tried to shed some more light on this issue. Some of them showing very promising  
13 results, but conversely with limitations regarding generalizability. This occurred in part  
14 due to a monocentric design of studies and a lack to show superiority across different  
15 cancer subtypes.<sup>10, 29</sup> Moreover, some of the mechanisms about how a supportive care  
16 intervention has to be composed and how it has to be implemented are barely  
17 understood<sup>30</sup>. In addition, it is still a matter of investigation on how to overcome  
18 obstacles when only remote counseling is applied due to rather disappointing results.<sup>31</sup>  
19  
20  
21  
22  
23  
24  
25  
26  
27  
28  
29

30  
31 32

33 In conclusion, the YonLife trial adds essential knowledge to the scarce data on  
34 PRO in patients with advanced STS. Unlike previous work, it is the first trial that applies  
35 an electronic PRO-assessment and a remote tailored intervention of patients with STS.  
36 Our data suggest that incorporation of validated QoL measures in STS clinical treatment  
37 may further improve the care and understanding of patient wellbeing beyond traditional  
38 clinical measures. Additionally, beyond proving the statistical significance of clinically  
39 important effects, this study is an important prerequisite for future research and holistic  
40 care of patients with advanced STS.  
41  
42  
43  
44  
45  
46  
47  
48  
49  
50  
51  
52  
53  
54  
55  
56  
57  
58  
59  
60

## FIGURE LEGENDS

**Figure 1.** Number of evaluated patients for all FACT-G dimensions per visit and cohort: V1: IC N=19, CC N=14; V4: IC N=18, CC N=14; V7: IC N=9, CC N=2. EWB, emotional well-being; FACT-G, Functional Assessment for Cancer Therapy; FWB, functional well-being; PWB, physical well-being; SD, standard deviation; SWB, social well-being; V, visit.

## CONTRIBUTORS

LH and MKS proposed the conception and design of the study, performed data analysis, interpretation and quality control of data and algorithms, and drafted the manuscript. MB, LH and MKS are responsible for the manuscript editing. MKS, SR, HGK, BK, AK, VG, TK and JMC performed the data acquisition. All authors participated in the manuscript review with equal contribution.

## FUNDING

This work was supported by an unrestricted grant from PharmaMar, Spain

## DATA AVAILABILITY STATEMENT

No additional data available

## COMPETING INTERESTS

None declared

## ACKNOWLEDGEMENTS

The trial was coordinated by GWT-TUD, Dresden, Germany. We acknowledge the German Interdisciplinary Sarcoma Group (GISG) for providing support for this trial. The YonLife trial was associated with the German Interdisciplinary Sarcoma Group as GISG-12 project and as AIO-STS-0215 within the 'Arbeitsgemeinschaft Internistische Onkologie' of the 'Deutsche Krebsgesellschaft' (DKG). We would also like to thank Kristian Zinke and Rocco Haase for their support on statistical aspects of the study and Felicitas Lenz and Adnan Tanović for proof-reading.

## REFERENCES

1. Reichardt, P., et al., *Quality of Life and Utility in Patients with Metastatic Soft Tissue and Bone Sarcoma: The Sarcoma Treatment and Burden of Illness in North America and Europe (SABINE) Study*. *Sarcoma*, 2012. **2012**: p. 740279.
2. McDonough, J., et al., *Health-related quality of life, psychosocial functioning, and unmet health needs in patients with sarcoma: A systematic review*. *Psychooncology*, 2019. **28**(4): p. 653-664.
3. Ostacoli, L., et al., *Quality of life, anxiety and depression in soft tissue sarcomas as compared to more common tumours: an observational study*. *Appl. Res. Qual. Life*, 2014. **9**(1): p. 123-131.
4. Tang, M.H., et al., *A systematic review of the recent quality of life studies in adult extremity sarcoma survivors*. *Sarcoma*, 2012. **2012**: p. 171342.
5. Paredes, T., et al., *Quality of life of sarcoma patients from diagnosis to treatments: predictors and longitudinal trajectories*. *Eur J Oncol Nurs*, 2011. **15**(5): p. 492-9.
6. Casali, P.G., et al., *Soft tissue and visceral sarcomas: ESMO-EURACAN Clinical Practice Guidelines for diagnosis, treatment and follow-up*. *Ann Oncol*, 2018. **29**(Supplement\_4): p. iv51-iv67.
7. Blay, J.Y., et al., *International expert opinion on patient-tailored management of soft tissue sarcomas*. *Eur J Cancer*, 2014. **50**(4): p. 679-89.
8. Bonnetain, F., et al., *Time until definitive quality of life score deterioration as a means of longitudinal analysis for treatment trials in patients with metastatic pancreatic adenocarcinoma*. *Eur J Cancer*, 2010. **46**(15): p. 2753-62.



- 1  
2  
3 9. Basch, E., et al., *Overall Survival Results of a Trial Assessing Patient-Reported*  
4 *Outcomes for Symptom Monitoring During Routine Cancer Treatment.* JAMA,  
5 2017. **318**(2): p. 197-198.  
6  
7
- 8  
9  
10 10. Basch, E., et al., *Symptom Monitoring With Patient-Reported Outcomes During*  
11 *Routine Cancer Treatment: A Randomized Controlled Trial.* J Clin Oncol, 2016.  
12 **34**(6): p. 557-65.  
13  
14
- 15 11. Berry, D.L., et al., *Electronic self-report assessment for cancer and self-care*  
16 *support: results of a multicenter randomized trial.* J Clin Oncol, 2014. **32**(3): p.  
17 199-205.  
18  
19
- 20 12. Klinkhammer-Schalke, M., et al., *Direct improvement of quality of life using a*  
21 *tailored quality of life diagnosis and therapy pathway: randomised trial in 200*  
22 *women with breast cancer.* Br J Cancer, 2012. **106**(5): p. 826-38.  
23  
24
- 25 13. Ruland, C.M., et al., *Effects of a computerized system to support shared decision*  
26 *making in symptom management of cancer patients: preliminary results.* J Am  
27 Med Inform Assoc, 2003. **10**(6): p. 573-9.  
28  
29
- 30 14. Yount, S.E., et al., *A randomized trial of weekly symptom telemonitoring in*  
31 *advanced lung cancer.* J Pain Symptom Manage, 2014. **47**(6): p. 973-89.  
32  
33
- 34 15. Winnette, R., et al., *The Patient Experience with Soft Tissue Sarcoma: A*  
35 *Systematic Review of the Literature.* Patient, 2017. **10**(2): p. 153-162.  
36  
37
- 38 16. Velikova, G., et al., *Measuring quality of life in routine oncology practice improves*  
39 *communication and patient well-being: a randomized controlled trial.* J Clin Oncol,  
40 2004. **22**(4): p. 714-24.  
41  
42  
43  
44  
45  
46  
47  
48  
49  
50  
51  
52  
53  
54  
55  
56  
57  
58  
59  
60

- 1  
2  
3 17. Strasser, F., et al., *The effect of real-time electronic monitoring of patient-reported*  
4 *symptoms and clinical syndromes in outpatient workflow of medical oncologists:*  
5 *E-MOSAIC, a multicenter cluster-randomized phase III study (SAKK 95/06).* Ann  
6 *Oncol*, 2016. **27**(2): p. 324-32.  
7  
8  
9  
10  
11  
12 18. Schuler, M., et al., *A cluster-randomised, controlled proof-of-concept study to*  
13 *explore the feasibility and effect of a patient-directed intervention on quality of life*  
14 *in patients with advanced soft tissue sarcoma.* *BMJ Open*, 2017. **7**(6): p.  
15 e014614.  
16  
17  
18  
19  
20  
21 19. Cella, D.F., et al., *The Functional Assessment of Cancer Therapy scale:*  
22 *development and validation of the general measure.* *J Clin Oncol*, 1993. **11**(3): p.  
23 570-9.  
24  
25  
26  
27  
28 20. King, M.T., et al., *Meta-analysis provides evidence-based interpretation*  
29 *guidelines for the clinical significance of mean differences for the FACT-G, a*  
30 *cancer-specific quality of life questionnaire.* *Patient Relat Outcome Meas*, 2010.  
31 **1**: p. 119-26.  
32  
33  
34  
35  
36  
37 21. Cohen, J., *A coefficient of agreement for nominal scales.*  
38 <https://doi.org/10.1177/001316446002000104>, 1960. **20**(1): p. 37-46.  
39  
40  
41  
42 22. Cleeland, C.S., et al., *Assessing symptom distress in cancer patients: the M.D.*  
43 *Anderson Symptom Inventory.* *Cancer*, 2000. **89**(7): p. 1634-46.  
44  
45  
46  
47 23. Zigmond, A.S. and R.P. Snaith, *The hospital anxiety and depression scale.* *Acta*  
48 *Psychiatr Scand*, 1983. **67**(6): p. 361-70.  
49  
50  
51 24. Singer, S., et al., *Hospital anxiety and depression scale cutoff scores for cancer*  
52 *patients in acute care.* *Br J Cancer*, 2009. **100**(6): p. 908-12.  
53  
54  
55

- 1  
2  
3 25. Ribaudo, J.M., et al., *Re-validation and shortening of the Functional Assessment*  
4 *of Anorexia/Cachexia Therapy (FAACT) questionnaire*. Qual Life Res, 2000.  
5  
6 **9**(10): p. 1137-46.  
7
- 8  
9  
10 26. Radbruch, L., et al., *Validation of the German version of the Brief Pain Inventory*.  
11  
12 J Pain Symptom Manage, 1999. **18**(3): p. 180-7.  
13
- 14 27. Brucker, P.S., et al., *General population and cancer patient norms for the*  
15 *Functional Assessment of Cancer Therapy-General (FACT-G)*. Eval Health Prof,  
16  
17 2005. **28**(2): p. 192-211.  
18
- 19 28. Gourgou-Bourgade, S., et al., *Impact of FOLFIRINOX compared with gemcitabine*  
20 *on quality of life in patients with metastatic pancreatic cancer: results from the*  
21 *PRODIGE 4/ACCORD 11 randomized trial*. J Clin Oncol, 2013. **31**(1): p. 23-9.  
22  
23
- 24 29. Temel, J.S., et al., *Effects of Early Integrated Palliative Care in Patients With*  
25 *Lung and GI Cancer: A Randomized Clinical Trial*. J Clin Oncol, 2017. **35**(8): p.  
26  
27 834-841.  
28
- 29 30. Bakitas, M.A., et al., *Early Versus Delayed Initiation of Concurrent Palliative*  
30 *Oncology Care: Patient Outcomes in the ENABLE III Randomized Controlled*  
31 *Trial*. J Clin Oncol, 2015. **33**(13): p. 1438-45.  
32  
33
- 34 31. Traeger, L., et al., *Nursing intervention to enhance outpatient chemotherapy*  
35 *symptom management: Patient-reported outcomes of a randomized controlled*  
36 *trial*. Cancer, 2015. **121**(21): p. 3905-13.  
37  
38
- 39 32. Young, J., et al., *Development and feasibility assessment of telephone-delivered*  
40 *supportive care to improve outcomes for patients with colorectal cancer: pilot*  
41  
42  
43  
44  
45  
46  
47  
48  
49  
50  
51  
52  
53  
54  
55  
56  
57  
58  
59  
60

1  
2  
3 *study of the CONNECT intervention.* Support Care Cancer, 2010. **18**(4): p. 461-  
4  
5 70.  
6  
7  
8  
9  
10  
11  
12  
13  
14  
15  
16  
17  
18  
19  
20  
21  
22  
23  
24  
25  
26  
27  
28  
29  
30  
31  
32  
33  
34  
35  
36  
37  
38  
39  
40  
41  
42  
43  
44  
45  
46  
47  
48  
49  
50  
51  
52  
53  
54  
55  
56  
57  
58  
59  
60

For peer review only

**Table 1. Patient characteristic at baseline**

|                                                                  | <b>Interventional<br/>cluster (IC),<br/>N=38</b> | <b>Control<br/>cluster (CC),<br/>N=29</b> | <b>Reference<br/>Center (RF),<br/>N=12</b> | <b>Full Analysis Set<br/>N=79</b> |
|------------------------------------------------------------------|--------------------------------------------------|-------------------------------------------|--------------------------------------------|-----------------------------------|
| <b>Gender</b>                                                    |                                                  |                                           |                                            |                                   |
| <b>Male</b>                                                      | 20                                               | 15                                        | 6                                          | 41                                |
| <b>Female</b>                                                    | 18                                               | 14                                        | 6                                          | 38                                |
| <b>Age</b>                                                       |                                                  |                                           |                                            |                                   |
| <b>Mean (SD)</b>                                                 | 58 (12)                                          | 56 (15)                                   | 63 (16)                                    | 58 (14)                           |
| <b>Range (years)</b>                                             | 38-87                                            | 22-80                                     | 34 - 82                                    | 22 - 87                           |
| <b>Tumor histology</b>                                           |                                                  |                                           |                                            |                                   |
| <b>Leiomyosarcoma</b>                                            | 19                                               | 5                                         | 5                                          | 29                                |
| <b>Liposarcoma</b>                                               | 6                                                | 11                                        | 3                                          | 20                                |
| <b>Others*</b>                                                   | 13                                               | 12                                        | 4                                          | 29                                |
| <b>missing</b>                                                   | 0                                                | 1                                         | 0                                          | 1                                 |
| <b>ECOG PS</b>                                                   |                                                  |                                           |                                            |                                   |
| <b>0</b>                                                         | 20                                               | 14                                        | 5                                          | 39                                |
| <b>1</b>                                                         | 15                                               | 13                                        | 7                                          | 35                                |
| <b>2</b>                                                         | 3                                                | 0                                         | 0                                          | 3                                 |
| <b>Missing</b>                                                   | 0                                                | 2                                         | 0                                          | 2                                 |
| <b>Number of previous<br/>cycles of trabectedin</b>              |                                                  |                                           |                                            |                                   |
| <b>Median</b>                                                    | 0                                                | 1                                         | 1                                          | 1                                 |
| <b>Range</b>                                                     | 0-15                                             | 0-17                                      | 0-11                                       | 0-17                              |
| <b>Number of previous<br/>cycles of another<br/>chemotherapy</b> |                                                  |                                           |                                            |                                   |
| <b>Median</b>                                                    | 1.5                                              | 1                                         | 2                                          | 2                                 |
| <b>Range</b>                                                     | 0 - 6                                            | 0 - 5                                     | 1-4                                        | 0-6                               |

\*All subtypes occurring less than four times were merged into this category.

ECOG PS, Eastern Cooperative Oncology Group performance status; SD, standard deviation.

**Table 2. Change scores after 9 weeks of treatment**

|                                     | Mean change from baseline (V1) to 9 weeks (V4) |                      |         | Interventional trend |
|-------------------------------------|------------------------------------------------|----------------------|---------|----------------------|
|                                     | Interventional cluster (IC)                    | Control cluster (CC) | P-value |                      |
| <b>FACT-G total</b>                 | -2.4                                           | -3.9                 | 0.955   | Beneficial           |
| <b>FACT-G physical well-being</b>   | -1.2                                           | -2.2                 | 0.722   | Beneficial           |
| <b>FACT-G social well-being</b>     | -1.6                                           | -0.3                 | 0.193   | Adverse              |
| <b>FACT-G emotional well-being</b>  | 0.9                                            | -0.1                 | 0.561   | Beneficial           |
| <b>FACT-G functional well-being</b> | -0.5                                           | -1.3                 | 0.536   | Beneficial           |
| <b>HADS depression</b>              | 0.3                                            | 0.2                  | 0.419   | Equivalent           |
| <b>HADS anxiety</b>                 | 0.3                                            | -0.8                 | 0.710   | Adverse              |
| <b>BPI average pain</b>             | 0.6                                            | 0.2                  | 0.788   | Adverse              |
| <b>BPI pain interference</b>        | 0.4                                            | 0.1                  | 0.679   | Adverse              |
| <b>MDASI, symptom severity</b>      | 0.7                                            | 0.2                  | 0.442   | Adverse              |
| <b>MDASI, symptom interference</b>  | 1.2                                            | 0.8                  | 0.667   | Adverse              |

BPI, Brief Pain Inventory; FACT-G, Functional Assessment for Cancer Therapy; HADS, Hospital Anxiety and Depression scale; MDASI, The M.D. Anderson Symptom Inventory; V, visit.

**Table 3.** Absolute FACT-scores at each assessment time

| Questionnaire                     | Visit | Interventional cluster (IC) |      | Control cluster (CC) |      | <i>P</i> -value | Total |      |
|-----------------------------------|-------|-----------------------------|------|----------------------|------|-----------------|-------|------|
|                                   |       | Mean                        | SD   | Mean                 | SD   |                 | Mean  | SD   |
| <b>FACT-G total score</b>         |       |                             |      |                      |      |                 |       |      |
|                                   | V1    | 74.9                        | 14.8 | 73.3                 | 11.6 | 0.788           | 74.2  | 13.0 |
|                                   | V2    | 76.8                        | 15.1 | 68.2                 | 16.6 | 0.145           | 73.1  | 16.1 |
|                                   | V3    | 72.0                        | 16.7 | 70.7                 | 11.8 | 0.708           | 72.1  | 14.3 |
|                                   | V4    | 73.9                        | 15.2 | 69.4                 | 18.4 | 0.512           | 71.6  | 16.2 |
|                                   | V5    | 80.2                        | 10.8 | 74.9                 | 14.8 | 0.588           | 77.3  | 14.8 |
|                                   | V6    | 76.6                        | 12.8 | 80.2                 | 11.8 | 0.402           | 77.2  | 13.2 |
|                                   | V7    | 79.1                        | 16.4 | 73.0                 | 8.5  | 0.582           | 75.7  | 14.9 |
| <b>FACT physical well-being</b>   |       |                             |      |                      |      |                 |       |      |
|                                   | V1    | 21.0                        | 5.3  | 21.2                 | 3.7  | 0.872           | 21.2  | 4.5  |
|                                   | V2    | 21.4                        | 5.0  | 18.7                 | 5.4  | 0.168           | 20.3  | 5.2  |
|                                   | V3    | 19.3                        | 5.6  | 20.2                 | 3.7  | 0.890           | 20.3  | 4.9  |
|                                   | V4    | 20.2                        | 6.6  | 19.0                 | 6.1  | 0.639           | 19.6  | 6.1  |
|                                   | V5    | 22.6                        | 3.4  | 20.9                 | 4.5  | 0.971           | 21.8  | 4.0  |
|                                   | V6    | 22.0                        | 4.4  | 22.1                 | 3.4  | 1.000           | 22.0  | 4.2  |
|                                   | V7    | 20.8                        | 7.0  | 18.0                 | 7.1  | 0.582           | 19.4  | 6.4  |
| <b>FACT social well-being</b>     |       |                             |      |                      |      |                 |       |      |
|                                   | V1    | 20.3                        | 5.4  | 18.6                 | 5.2  | 0.304           | 19.8  | 5.2  |
|                                   | V2    | 20.5                        | 4.6  | 17.7                 | 6.0  | 0.251           | 19.6  | 5.2  |
|                                   | V3    | 19.5                        | 4.6  | 17.9                 | 4.6  | 0.395           | 19.2  | 4.5  |
|                                   | V4    | 19.2                        | 5.0  | 18.3                 | 6.2  | 0.896           | 19.3  | 5.3  |
|                                   | V5    | 20.9                        | 3.9  | 20.4                 | 5.1  | 0.913           | 20.5  | 4.5  |
|                                   | V6    | 20.7                        | 2.7  | 22.2                 | 3.2  | 0.188           | 21.2  | 3.2  |
|                                   | V7    | 21.8                        | 3.1  | 21.0                 | 1.4  | 0.727           | 21.3  | 3.8  |
| <b>FACT emotional well-being</b>  |       |                             |      |                      |      |                 |       |      |
|                                   | V1    | 16.2                        | 3.8  | 16.7                 | 2.6  | 0.986           | 16.0  | 3.3  |
|                                   | V2    | 17.0                        | 3.3  | 16.6                 | 2.6  | 0.667           | 16.5  | 3.7  |
|                                   | V3    | 17.0                        | 4.0  | 17.7                 | 3.1  | 0.767           | 16.7  | 3.8  |
|                                   | V4    | 17.4                        | 2.7  | 16.6                 | 3.3  | 0.377           | 16.6  | 3.3  |
|                                   | V5    | 17.7                        | 2.2  | 17.1                 | 1.2  | 0.393           | 17.1  | 2.3  |
|                                   | V6    | 16.8                        | 3.4  | 16.6                 | 3.2  | 0.570           | 16.1  | 3.6  |
|                                   | V7    | 17.3                        | 2.4  | 16.0                 | 1.4  | 0.327           | 16.9  | 3.1  |
| <b>FACT functional well-being</b> |       |                             |      |                      |      |                 |       |      |
|                                   | V1    | 17.3                        | 5.3  | 16.8                 | 4.3  | 0.900           | 17.2  | 4.5  |
|                                   | V2    | 17.9                        | 5.4  | 15.1                 | 5.9  | 0.319           | 16.7  | 5.4  |
|                                   | V3    | 16.1                        | 6.4  | 14.9                 | 4.5  | 0.679           | 16.0  | 5.4  |
|                                   | V4    | 17.1                        | 5.4  | 15.5                 | 5.7  | 0.512           | 16.2  | 5.4  |
|                                   | V5    | 18.8                        | 4.6  | 16.4                 | 5.3  | 0.485           | 17.9  | 4.5  |
|                                   | V6    | 17.1                        | 6.1  | 19.3                 | 3.8  | 0.441           | 17.9  | 5.4  |
|                                   | V7    | 19.2                        | 7.0  | 18.0                 | 1.4  | 0.909           | 18.0  | 6.0  |

FACT-G, Functional Assessment for Cancer Therapy; SD, standard deviation; V, visit.

**Table 4.** Absolute scores of secondary outcomes

| Questionnaire             | Visit | Interventional cluster (IC) |      | Control cluster (CC) |      | <i>P</i> -value | Total |      |
|---------------------------|-------|-----------------------------|------|----------------------|------|-----------------|-------|------|
|                           |       | Mean                        | SD   | Mean                 | SD   |                 | Mean  | SD   |
| <b>FAACT score</b>        |       |                             |      |                      |      |                 |       |      |
|                           | V1    | 37,9                        | 4,3  | 39,1                 | 5,4  | 0,439           | 38,3  | 4,8  |
|                           | V2    | 37,9                        | 5,2  | 39,1                 | 6,0  | 0,398           | 38,7  | 5,3  |
|                           | V3    | 37,4                        | 5,5  | 37,9                 | 5,2  | 0,828           | 38,1  | 5,0  |
|                           | V4    | 35,0                        | 6,7  | 38,6                 | 7,1  | 0,099           | 36,9  | 6,4  |
|                           | V5    | 39,3                        | 4,5  | 37,3                 | 8,9  | 0,877           | 37,7  | 6,2  |
|                           | V6    | 38,3                        | 4,7  | 40,3                 | 4,3  | 0,365           | 38,6  | 4,8  |
|                           | V7    | 33,0                        | 11,8 | 34,0                 | 14,1 | 1,000           | 33,2  | 10,0 |
| <b>MDASI severity</b>     |       |                             |      |                      |      |                 |       |      |
|                           | V1    | 1,9                         | 1,5  | 1,9                  | 1,5  | 1,000           | 2,0   | 1,4  |
|                           | V2    | 2,0                         | 1,5  | 2,5                  | 1,6  | 0,464           | 2,2   | 1,6  |
|                           | V3    | 2,5                         | 1,4  | 2,0                  | 1,0  | 0,417           | 2,2   | 1,3  |
|                           | V4    | 2,4                         | 1,6  | 2,1                  | 1,6  | 0,561           | 2,2   | 1,6  |
|                           | V5    | 2,0                         | 0,9  | 2,7                  | 1,6  | 0,588           | 2,1   | 1,3  |
|                           | V6    | 2,1                         | 1,2  | 2,4                  | 1,7  | 0,868           | 2,2   | 1,5  |
|                           | V7    | 2,5                         | 1,6  | 2,2                  | 1,7  | 1,000           | 2,6   | 1,9  |
| <b>MDASI interference</b> |       |                             |      |                      |      |                 |       |      |
|                           | V1    | 1,9                         | 2,1  | 2,2                  | 1,6  | 0,397           | 2,1   | 2,0  |
|                           | V2    | 2,2                         | 2,0  | 3,4                  | 1,9  | 0,065           | 2,6   | 2,0  |
|                           | V3    | 2,8                         | 2,3  | 2,9                  | 1,6  | 0,798           | 2,8   | 2,0  |
|                           | V4    | 3,0                         | 2,1  | 2,9                  | 2,2  | 0,837           | 2,9   | 2,2  |
|                           | V5    | 2,2                         | 1,8  | 2,8                  | 2,3  | 0,588           | 2,2   | 1,8  |
|                           | V6    | 2,3                         | 1,7  | 2,9                  | 1,9  | 0,570           | 2,4   | 1,8  |
|                           | V7    | 0,6                         | 2,6  | 3,3                  | 3,1  | 1,000           | 2,9   | 2,6  |

FAACT, Functional Assessment of Anorexia/Cachexia Therapy questionnaire; MDASI, The M.D. Anderson Symptom Inventory; SD, standard deviation; V, visit.



**Table 5.** Univariate regression of parameters at baseline (V1) and after nine weeks (V4) over all groups

|                             | R <sup>2</sup> | P-value | b1   |
|-----------------------------|----------------|---------|------|
| <b>Gender</b>               | 0.05           | 0.154   | 7.5  |
| <b>Age</b>                  | 0.04           | 0.228   | -0.2 |
| <b>ECOG</b>                 | 0.01           | 0.509   | -3.2 |
| <b>Tumor stadium</b>        | 0.03           | 0.284   | -1.8 |
| <b>Symptom severity</b>     | 0.31           | 0.0     | -6.6 |
| <b>Symptom interference</b> | 0.16           | 0.011   | -3.4 |
| <b>Depression</b>           | 0.35           | 0.0     | -2.7 |
| <b>Anxiety</b>              | 0.12           | 0.034   | -1.4 |
| <b>Patient Satisfaction</b> | 0.02           | 0.451   | 3.0  |
| <b>Anorexia/Cachexia</b>    | 0.06           | 0.143   | 0.8  |

R<sup>2</sup> – coefficient of determination; b1 – regression coefficient

**Figure 1.** Absolute FACT-scores at baseline (V1), after nine weeks of treatment (V4; primary endpoint) and during follow up visit (V7)

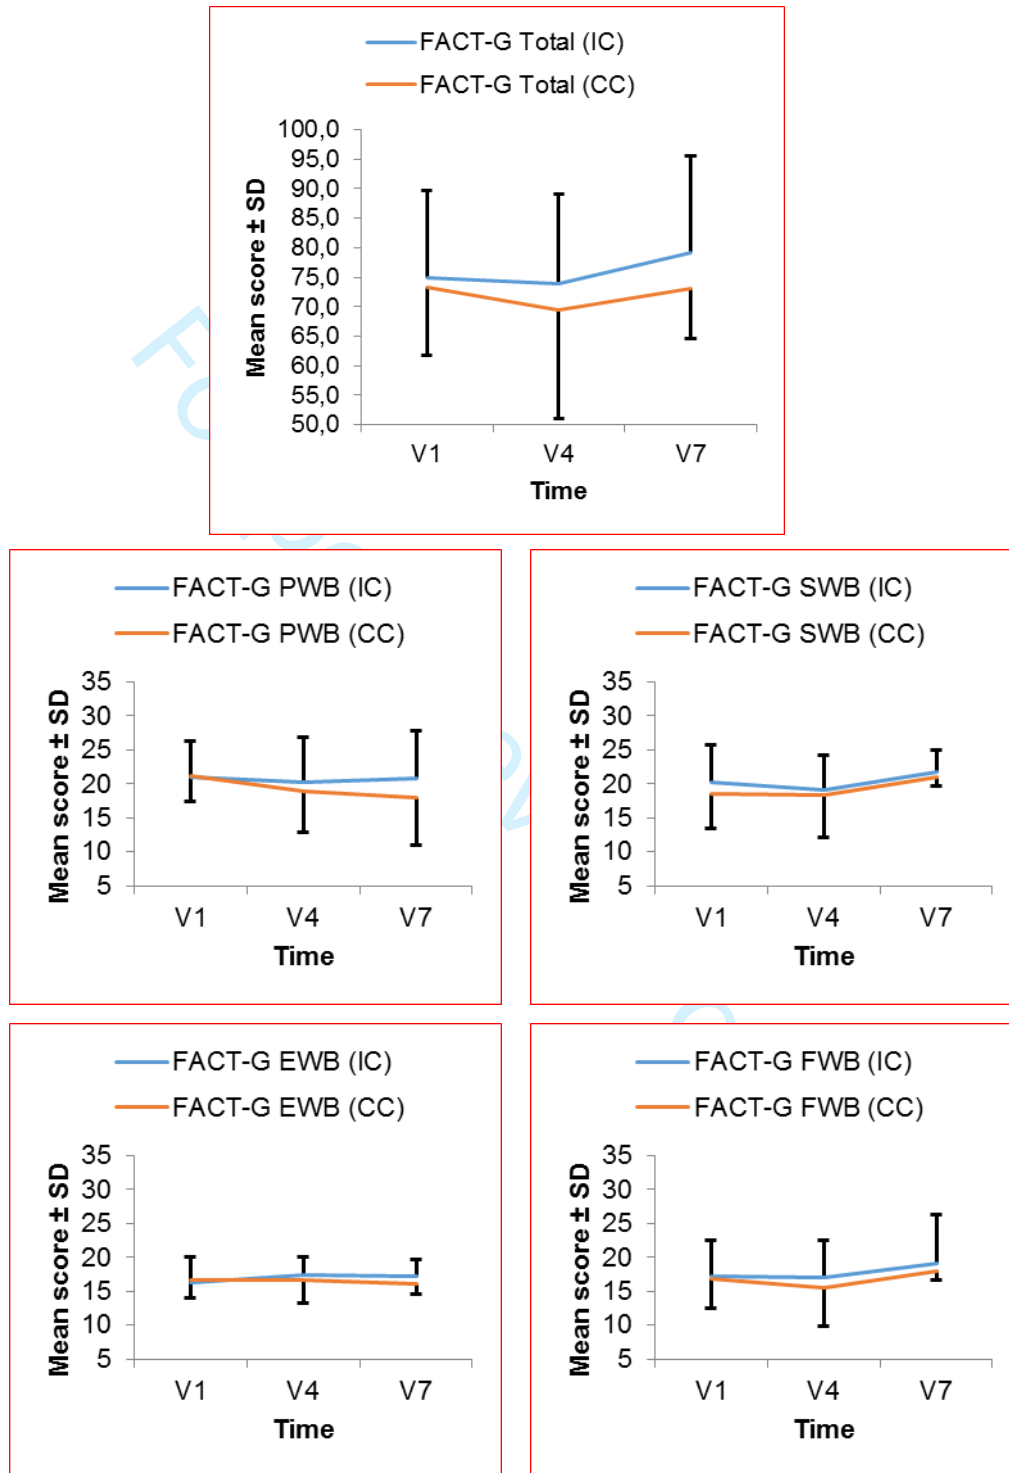

STROBE 2007 (v4) Statement—Checklist of items that should be included in reports of *cohort studies*

| Section/Topic                | Item # | Recommendation                                                                                                                                                                       | Reported on page # |
|------------------------------|--------|--------------------------------------------------------------------------------------------------------------------------------------------------------------------------------------|--------------------|
| Title and abstract           | 1      | (a) Indicate the study's design with a commonly used term in the title or the abstract                                                                                               | 1                  |
|                              |        | (b) Provide in the abstract an informative and balanced summary of what was done and what was found                                                                                  | 2                  |
| Introduction                 |        |                                                                                                                                                                                      |                    |
| Background/rationale         | 2      | Explain the scientific background and rationale for the investigation being reported                                                                                                 | 5                  |
| Objectives                   | 3      | State specific objectives, including any prespecified hypotheses                                                                                                                     | 6                  |
| Methods                      |        |                                                                                                                                                                                      |                    |
| Study design                 | 4      | Present key elements of study design early in the paper                                                                                                                              | 7                  |
| Setting                      | 5      | Describe the setting, locations, and relevant dates, including periods of recruitment, exposure, follow-up, and data collection                                                      | 7                  |
| Participants                 | 6      | (a) Give the eligibility criteria, and the sources and methods of selection of participants. Describe methods of follow-up                                                           | 7-8                |
|                              |        | (b) For matched studies, give matching criteria and number of exposed and unexposed                                                                                                  | 7                  |
| Variables                    | 7      | Clearly define all outcomes, exposures, predictors, potential confounders, and effect modifiers. Give diagnostic criteria, if applicable                                             | 8-9                |
| Data sources/<br>measurement | 8*     | For each variable of interest, give sources of data and details of methods of assessment (measurement). Describe comparability of assessment methods if there is more than one group | 8-10               |
| Bias                         | 9      | Describe any efforts to address potential sources of bias                                                                                                                            | 8-10               |
| Study size                   | 10     | Explain how the study size was arrived at                                                                                                                                            | 9                  |
| Quantitative variables       | 11     | Explain how quantitative variables were handled in the analyses. If applicable, describe which groupings were chosen and why                                                         | 9-10               |
| Statistical methods          | 12     | (a) Describe all statistical methods, including those used to control for confounding                                                                                                | 9-10               |
|                              |        | (b) Describe any methods used to examine subgroups and interactions                                                                                                                  | 8-9                |
|                              |        | (c) Explain how missing data were addressed                                                                                                                                          | NA                 |
|                              |        | (d) If applicable, explain how loss to follow-up was addressed                                                                                                                       |                    |
|                              |        | (e) Describe any sensitivity analyses                                                                                                                                                |                    |
| Results                      |        |                                                                                                                                                                                      |                    |

|                   |     |                                                                                                                                                                                                              |       |
|-------------------|-----|--------------------------------------------------------------------------------------------------------------------------------------------------------------------------------------------------------------|-------|
| Participants      | 13* | (a) Report numbers of individuals at each stage of study—eg numbers potentially eligible, examined for eligibility, confirmed eligible, included in the study, completing follow-up, and analysed            | 11    |
|                   |     | (b) Give reasons for non-participation at each stage                                                                                                                                                         | 11    |
|                   |     | (c) Consider use of a flow diagram                                                                                                                                                                           | NA    |
| Descriptive data  | 14* | (a) Give characteristics of study participants (eg demographic, clinical, social) and information on exposures and potential confounders                                                                     | 11    |
|                   |     | (b) Indicate number of participants with missing data for each variable of interest                                                                                                                          | 11    |
|                   |     | (c) Summarise follow-up time (eg, average and total amount)                                                                                                                                                  | 11    |
| Outcome data      | 15* | Report numbers of outcome events or summary measures over time                                                                                                                                               | 11-12 |
| Main results      | 16  | (a) Give unadjusted estimates and, if applicable, confounder-adjusted estimates and their precision (eg, 95% confidence interval). Make clear which confounders were adjusted for and why they were included | 11    |
|                   |     | (b) Report category boundaries when continuous variables were categorized                                                                                                                                    | NA    |
|                   |     | (c) If relevant, consider translating estimates of relative risk into absolute risk for a meaningful time period                                                                                             | NA    |
| Other analyses    | 17  | Report other analyses done—eg analyses of subgroups and interactions, and sensitivity analyses                                                                                                               | 11-12 |
| Discussion        |     |                                                                                                                                                                                                              |       |
| Key results       | 18  | Summarise key results with reference to study objectives                                                                                                                                                     | 13    |
| Limitations       |     |                                                                                                                                                                                                              |       |
| Interpretation    | 20  | Give a cautious overall interpretation of results considering objectives, limitations, multiplicity of analyses, results from similar studies, and other relevant evidence                                   | 13-14 |
| Generalisability  | 21  | Discuss the generalisability (external validity) of the study results                                                                                                                                        | 13-14 |
| Other information |     |                                                                                                                                                                                                              |       |
| Funding           | 22  | Give the source of funding and the role of the funders for the present study and, if applicable, for the original study on which the present article is based                                                | 4     |

\*Give information separately for cases and controls in case-control studies and, if applicable, for exposed and unexposed groups in cohort and cross-sectional studies.

Note: An Explanation and Elaboration article discusses each checklist item and gives methodological background and published examples of transparent reporting. The STROBE checklist is best used in conjunction with this article (freely available on the Web sites of PLoS Medicine at <http://www.plosmedicine.org/>, Annals of Internal Medicine at <http://www.annals.org/>, and Epidemiology at <http://www.epidem.com/>). Information on the STROBE Initiative is available at [www.strobe-statement.org](http://www.strobe-statement.org).

# BMJ Open

**Quality of life and added value of a tailored palliative care intervention in patients with soft tissue sarcoma undergoing treatment with trabectedin: A multicenter, cluster-randomized trial within the Germany Interdisciplinary Sarcoma Group (GISG)**

|                                 |                                                                                                                                                                                                                                                                                                                                                                                                                                                                                                                                                                                                                                                                                                                                                                                                                                                                                                                                                                                                                                                                                                                                                                                                                                                                                                                                                                                                                                                                                                                                                                                                                                                                                                                                                                |
|---------------------------------|----------------------------------------------------------------------------------------------------------------------------------------------------------------------------------------------------------------------------------------------------------------------------------------------------------------------------------------------------------------------------------------------------------------------------------------------------------------------------------------------------------------------------------------------------------------------------------------------------------------------------------------------------------------------------------------------------------------------------------------------------------------------------------------------------------------------------------------------------------------------------------------------------------------------------------------------------------------------------------------------------------------------------------------------------------------------------------------------------------------------------------------------------------------------------------------------------------------------------------------------------------------------------------------------------------------------------------------------------------------------------------------------------------------------------------------------------------------------------------------------------------------------------------------------------------------------------------------------------------------------------------------------------------------------------------------------------------------------------------------------------------------|
| Journal:                        | <i>BMJ Open</i>                                                                                                                                                                                                                                                                                                                                                                                                                                                                                                                                                                                                                                                                                                                                                                                                                                                                                                                                                                                                                                                                                                                                                                                                                                                                                                                                                                                                                                                                                                                                                                                                                                                                                                                                                |
| Manuscript ID                   | bmjopen-2019-035546.R1                                                                                                                                                                                                                                                                                                                                                                                                                                                                                                                                                                                                                                                                                                                                                                                                                                                                                                                                                                                                                                                                                                                                                                                                                                                                                                                                                                                                                                                                                                                                                                                                                                                                                                                                         |
| Article Type:                   | Original research                                                                                                                                                                                                                                                                                                                                                                                                                                                                                                                                                                                                                                                                                                                                                                                                                                                                                                                                                                                                                                                                                                                                                                                                                                                                                                                                                                                                                                                                                                                                                                                                                                                                                                                                              |
| Date Submitted by the Author:   | 27-Mar-2020                                                                                                                                                                                                                                                                                                                                                                                                                                                                                                                                                                                                                                                                                                                                                                                                                                                                                                                                                                                                                                                                                                                                                                                                                                                                                                                                                                                                                                                                                                                                                                                                                                                                                                                                                    |
| Complete List of Authors:       | Hentschel, Leopold; University Hospital Carl Gustav Carus, Department of Psychooncology of the University Cancer Center<br>Richter, Stephan; University Hospital Carl Gustav Carus, Department of Internal Medicine I<br>Kopp, Hans-Georg; Robert-Bosch-Center of Tumor Diseases, Interdisciplinary Center for Soft-Tissue-Sarcoma, GIST and Bone-Tumor<br>Kasper, Bernd; University Medical Center Mannheim, Medical Faculty Mannheim, University of Heidelberg, Sarcoma Unit, Interdisciplinary Tumor Center<br>Kunitz, Annegret; Vivantes Clinic Spandau, Internal Medicine<br>Grünwald, Viktor ; University Hospital Essen, Interdisciplinary Genitourinary Oncology/West-German Cancer Center<br>Kessler, Torsten; University Hospital of Münster, Hematology Oncology<br>Chemnitz, Jens Marcus; ev. Stift St. Martin, Internal Medicine<br>Pelzer, Uwe; Charité Medical University, Division of Hematology, Oncology and Tumor Immunology<br>Schuler, Ulrich; University Hospital Carl Gustav Carus, University Palliative Center<br>Freitag, Janet; University Hospital Carl Gustav Carus, Department of Internal Medicine I<br>Schilling, Andrea; University Hospital Carl Gustav Carus, Department of Social Work<br>Hornemann, Beate; University Hospital Carl Gustav Carus, Department of Psychooncology of the University Cancer Center<br>Arndt, Karin; Das Lebenshaus e.V, Patient Advocacy<br>Bornhaeuser, Martin; University Hospital Carl Gustav Carus, Department of Internal Medicine I; Deutsches Krebsforschungszentrum, National Center for Tumor Diseases (NCT)<br>Schuler, Markus Kajo; University Hospital Carl Gustav Carus, Department of Internal Medicine I; HELIOS Hospital Emil von Behring, Department of Internal Medicine II |
| <b>Primary Subject Heading</b>: | Palliative care                                                                                                                                                                                                                                                                                                                                                                                                                                                                                                                                                                                                                                                                                                                                                                                                                                                                                                                                                                                                                                                                                                                                                                                                                                                                                                                                                                                                                                                                                                                                                                                                                                                                                                                                                |
| Secondary Subject Heading:      | Oncology, Patient-centred medicine                                                                                                                                                                                                                                                                                                                                                                                                                                                                                                                                                                                                                                                                                                                                                                                                                                                                                                                                                                                                                                                                                                                                                                                                                                                                                                                                                                                                                                                                                                                                                                                                                                                                                                                             |

1  
2  
3  
4  
5  
6  
7  
8  
9  
10  
11  
12  
13  
14  
15  
16  
17  
18  
19  
20  
21  
22  
23  
24  
25  
26  
27  
28  
29  
30  
31  
32  
33  
34  
35  
36  
37  
38  
39  
40  
41  
42  
43  
44  
45  
46  
47  
48  
49  
50  
51  
52  
53  
54  
55  
56  
57  
58  
59  
60

|           |                                                                                                                  |
|-----------|------------------------------------------------------------------------------------------------------------------|
| Keywords: | Sarcoma < ONCOLOGY, Quality in health care < HEALTH SERVICES ADMINISTRATION & MANAGEMENT, Cancer pain < ONCOLOGY |
|           |                                                                                                                  |

SCHOLARONE™  
Manuscripts

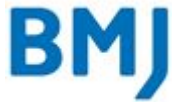

I, the Submitting Author has the right to grant and does grant on behalf of all authors of the Work (as defined in the below author licence), an exclusive licence and/or a non-exclusive licence for contributions from authors who are: i) UK Crown employees; ii) where BMJ has agreed a CC-BY licence shall apply, and/or iii) in accordance with the terms applicable for US Federal Government officers or employees acting as part of their official duties; on a worldwide, perpetual, irrevocable, royalty-free basis to BMJ Publishing Group Ltd ("BMJ") its licensees and where the relevant Journal is co-owned by BMJ to the co-owners of the Journal, to publish the Work in this journal and any other BMJ products and to exploit all rights, as set out in our [licence](#).

The Submitting Author accepts and understands that any supply made under these terms is made by BMJ to the Submitting Author unless you are acting as an employee on behalf of your employer or a postgraduate student of an affiliated institution which is paying any applicable article publishing charge ("APC") for Open Access articles. Where the Submitting Author wishes to make the Work available on an Open Access basis (and intends to pay the relevant APC), the terms of reuse of such Open Access shall be governed by a Creative Commons licence – details of these licences and which [Creative Commons](#) licence will apply to this Work are set out in our licence referred to above.

Other than as permitted in any relevant BMJ Author's Self Archiving Policies, I confirm this Work has not been accepted for publication elsewhere, is not being considered for publication elsewhere and does not duplicate material already published. I confirm all authors consent to publication of this Work and authorise the granting of this licence.

## Original Research

**Quality of life and added value of a tailored palliative care intervention in patients with soft tissue sarcoma undergoing treatment with trabectedin: A multicenter, cluster-randomized trial within the Germany Interdisciplinary Sarcoma Group (GISG)**

Leopold Hentschel<sup>a</sup>, Stephan Richter<sup>b</sup>, Hans-Georg Kopp<sup>c</sup>, Bernd Kasper<sup>d</sup>, Annegret Kunitz<sup>e</sup>, Viktor Grünwald<sup>f</sup>, Torsten Kessler<sup>g</sup>, Jens Marcus Chemnitz<sup>h</sup>, Uwe Pelzer<sup>i</sup>, Ulrich Schuler<sup>j</sup>, Janet Freitag<sup>b</sup>, Andrea Schilling<sup>k</sup>, Beate Hornemann<sup>a</sup>, Karin Arndt<sup>l</sup>, Martin Bornhäuser<sup>b,m</sup>, Markus Kajo Schuler<sup>b,n</sup>

## Author affiliations

- <sup>a</sup> Department of Psychooncology of the University Cancer Center, University Hospital Carl Gustav Carus, Dresden, Germany
- <sup>b</sup> Department of Internal Medicine I, University Hospital Carl Gustav Carus, TU Dresden, Dresden, Germany
- <sup>c</sup> Interdisciplinary Center for Soft-Tissue-Sarcoma, GIST and Bone-Tumor, Robert-Bosch-Center of Tumor Diseases, Stuttgart, Germany
- <sup>d</sup> Sarcoma Unit, Interdisciplinary Tumor Center, University Medical Center, University of Heidelberg, Mannheim, Germany
- <sup>e</sup> Internal Medicine, Vivantes Clinic Spandau, Berlin, Germany
- <sup>f</sup> Interdisciplinary Genitourinary Oncology/West-German Cancer Center, University Hospital Essen, Essen, Germany
- <sup>g</sup> Hematology Oncology, University Hospital of Münster, Münster, Germany
- <sup>h</sup> Internal Medicine, ev. Stift St. Martin, Koblenz, Germany
- <sup>i</sup> Division of Hematology, Oncology and Tumor Immunology, Charité Medical University, Berlin, Germany
- <sup>j</sup> University Palliative Center, University Hospital Carl Gustav Carus, Dresden, Germany
- <sup>k</sup> Department of Social Work, University Hospital Carl Gustav Carus, Dresden, Germany
- <sup>l</sup> Patient Advocacy „Das Lebenshaus e.V.“, Wölfersheim, Germany
- <sup>m</sup> National Center for Tumor Diseases (NCT), Deutsches Krebsforschungszentrum, Heidelberg, Germany
- <sup>n</sup> Department of Internal Medicine II, Helios Hospital Emil von Behring, Berlin, Germany

**Correspondence to:**

**Mr. Leopold Hentschel, Dipl. Psych.**

University Cancer Center, University Hospital Carl Gustav Carus, Fetscherstraße 74, 01307 Dresden, Germany

Phone: +49-351-458-7120

E-mail: [Leopold.Hentschel@uniklinikum-dresden.de](mailto:Leopold.Hentschel@uniklinikum-dresden.de)



## ABSTRACT

**Objectives:** The choice of drug treatment in advanced soft tissue sarcoma (STS) continues to be a challenge regarding efficacy, quality of life (QoL) and toxicity. Unlike other cancer types, where integrating patient-reported outcomes (PRO) has proven to be beneficial for QoL, there is no such evidence in patients with STS as of now. The YonLife trial aimed to explore the effect of a tailored multi-step intervention on QoL, symptoms and survival in patients with advanced STS undergoing treatment with trabectedin as well as identifying predictors of QoL.

**Design:** YonLife is a cluster-randomized, open-label, proof-of-concept study. The intervention incorporates electronic PRO-assessment, a case-vignette and expert-consented treatment recommendations.

**Participants:** Six hospitals were randomized to the control arm (CA) or interventional arm (IA). Seventy-nine patients were included.

**Primary and secondary outcome measures:** The primary endpoint was the change of FACT-G total score after nine weeks. Secondary outcomes included measures of QoL (FACT-G subscales), anorexia and cachexia (FAACT), symptoms (MDASI), anxiety and depression (HADS), pain intensity and interference (BPI), and survival assessment.

**Results:** After nine weeks of treatment QoL declined less in the IA ( $\Delta$  FACT-G total score: -2.4, 95% CI: -9.2 to 4.5) as compared to CA ( $\Delta$  FACT-G total score: -3.9; 95% CI: -11.3 to 3.5;  $P=0.765$ ). A beneficial trend of the patient-tailored evaluation in IA was observed in almost all FACT-G subscales. Smaller adverse trends between arms were observed for MDASI, FAACT, HADS and BPI scales. Overall mean survival was longer

1  
2  
3 in IA (648 days) than in CA (389 days,  $P=0.110$ ). QoL was predicted by symptom  
4 severity, symptom interference, depression and anxiety.  
5  
6

7 **Conclusion:** Our data suggest that a tailored intervention based on ePRO may improve  
8 global QoL and subscales, while it did not have a beneficial impact on single symptoms.  
9  
10

11 **Trial registration:** ClinicalTrials.gov Identifier: NCT02204111.  
12  
13  
14  
15  
16  
17  
18  
19  
20  
21  
22  
23  
24  
25  
26  
27  
28  
29  
30  
31  
32  
33  
34  
35  
36  
37  
38  
39  
40  
41  
42  
43  
44  
45  
46  
47  
48  
49  
50  
51  
52  
53  
54  
55  
56  
57  
58  
59  
60

For peer review only

## STRENGTHS AND LIMITATIONS OF THIS STUDY

- YonLife explores the value and efficacy of a patient-directed intervention on quality of life (QoL) in sarcoma patients
- YonLife captures patient-reported outcomes (PRO) electronically and provides a tailored expert-derived intervention in a multi-center setting
- The intervention yields beneficial impact on global QoL but not on single symptoms

## KEYWORDS

Sarcoma, quality of life, patient-reported outcomes, trabectedin

## INTRODUCTION

The armamentarium of systemic treatment in advanced soft tissue sarcoma (STS) has evolved over the past decade. Yet, the burden of disease remains high and drug related adverse events are frequent<sup>1-3</sup>, even in patients who experience long lasting clinical benefit. Overall, quality of life (QoL) in sarcoma-patients is more impaired than in the general population<sup>2, 4</sup>, but comparable to patients with more frequent cancer diseases.<sup>5</sup> Mental health problems such as distress, depression and anxiety are as frequent as in other cancer patients.<sup>6, 7</sup>

Treatment algorithms for STS beyond first-line treatment do not show superiority between one regimen and another.<sup>8</sup> On the other hand, there are distinct and drug-specific side effects. Therefore, the choice of which regimen should be applied becomes a matter of debate within the patient-doctor consultation with considerations comprising preferences and personal beliefs.<sup>9</sup> Consequently, it is important to assess the treatment effectiveness in two ways. First, in terms of tumor burden as an outcome (e.g., progression-free survival or overall survival), and, secondly, in terms of symptoms and toxicities as assessed by patient-reported outcomes (PRO). As an individual might experience improvement in symptoms while a treatment is not superior on a group-level, appropriate strategies to evaluate the individual patient benefit need to be applied. Especially, if there is no superiority in survival, further outcomes should be considered, such as evaluation of minimal clinical important difference or the time to deterioration of QoL.<sup>10</sup>

Trabectedin (Yondelis<sup>®</sup>) is a semi-synthetic drug originally isolated from the sea squirt *Ecteinascidia turbinata* with a complex multimodal mechanism of action.<sup>11, 12</sup>

1  
2  
3 Trabectedin was the first marine-derived antineoplastic drug approved in 2007 in the  
4 European Union and in over 70 countries across the globe for the treatment of patients  
5 with advanced STS after failure of anthracyclines and ifosfamide, or who are unsuited to  
6 receive these agents.<sup>13</sup> In 2015, trabectedin was also approved in the United States  
7 based on a pivotal phase III trial, which demonstrated that trabectedin had a significantly  
8 longer PFS compared with dacarbazine in patients with advanced liposarcoma or  
9 leiomyosarcoma after failure of prior chemotherapy.<sup>14</sup> Noteworthy, an *ad hoc* analysis of  
10 the phase III trial, which compared inpatient with outpatient infusion of trabectedin,  
11 showed that safety, efficacy and PROs outcomes were comparable between both  
12 treatment settings.<sup>15</sup> In addition, an analysis of the MD Anderson Symptom Inventory  
13 (MDASI) PRO scores reported no clinically meaningful differences among patients  
14 reporting severe symptoms (MDASI score  $\geq 7$ ) who were treated with trabectedin in  
15 either an inpatient or outpatient treatment settings.<sup>15</sup>

16  
17 Assessment and interventions based on PRO have been proven to yield  
18 beneficial outcomes in various settings and entities.<sup>16-21</sup> For instance, Basch *et al* found  
19 benefits of their STAR (Symptom Tracking and Reporting) intervention in prolonging  
20 time on chemotherapy, less unexpected admission and longer quality-adjusted survival.  
21  
22 <sup>17</sup> In brief, they randomized 766 patients from a single institution under chemotherapy for  
23 solid tumors to either usual care or STAR. The intervention consisted of 12 different  
24 symptoms collected remotely, providing treating physicians with graphical  
25 representations of results and alerting nurses when a preset cut-off of worsening  
26 condition was met. Another randomized multi-center trial evaluated the effect of a web-  
27 based, self-report assessment and educational intervention on symptom distress during

1  
2  
3 cancer therapy in 752 ambulatory patients from different entities and with various  
4 diagnoses.<sup>18</sup> In this multicenter sample of participants they reported that Web-based  
5 patients-rated symptoms and communication coaching reduced symptom distress after  
6 active cancer treatment, particularly in those aged >50 years. Nevertheless, PRO  
7 assessment in patients treated for STS struggle with serious barriers such as a relatively  
8 small patient population and the fact that no STS-specific QoL- or symptom-  
9 questionnaires are available.<sup>4, 22</sup> Considering that merely assessing PRO might not be  
10 beneficial<sup>23</sup>, we believe it should be accompanied by additional interventions such as  
11 nurse-led patient education, self-care support or a multi-professional expert panel that  
12 discusses PRO-results and derive treatment recommendations.<sup>24</sup> Despite the increasing  
13 knowledge on benefits and assessment of PRO in general and the high symptom-  
14 burden of patients suffering from advanced STS, the proof of concept for such  
15 interventions remains open. Therefore, the cluster-randomized YonLife study was  
16 designed to evaluate the value and efficacy of a tailored, patient-directed palliative  
17 intervention based on various domains of QoL and to explore effect sizes using different  
18 PRO instruments in patients with advanced STS undergoing treatment with trabectedin.  
19  
20  
21  
22  
23  
24  
25  
26  
27  
28  
29  
30  
31  
32  
33  
34  
35  
36  
37  
38  
39  
40  
41  
42  
43  
44  
45  
46  
47  
48  
49  
50  
51  
52  
53  
54  
55  
56  
57  
58  
59  
60

## METHODS

### Patients

Adult patients ( $\geq 18$  years) suffering from advanced or metastatic STS who had received at least one dose of trabectedin  $1.5 \text{ mg/m}^2$ , given as a 24-hour intravenous infusion every three weeks, were included in this study. Physician-assessed life expectancy of patients had to be at least six months and Eastern Cooperative Oncology Group (ECOG)-performance status score had to be  $\leq 2$ . All study procedures were conducted in accordance with the ethical standards as laid down in the 1964 Declaration of Helsinki and its later amendments. The YonLife trial was approved by the Ethics Committee of the University Hospital Carl Gustav Carus in Dresden on June 2014 (EK241062014), and all participating centers obtained the approval of the local ethics committee before patient enrolment. All patients provided written informed consent before inclusion in the study.

### Patient and public involvement

We are grateful to all patients that participated in the YonLife trial. A member of the national sarcoma patient advocacy group “Das Lebenhaus” took part in the expert panel discussion.

### Trial design and objectives

Full details of YonLife trial (ClinicalTrials.gov Identifier: NCT02204111) have been reported.<sup>25</sup> Briefly, the YonLife trial was designed as a cluster-randomized, explorative, open-label, non-blinded, proof-of-concept study with the aim to compare the overall

1  
2  
3 QoL between patients with STS receiving a multidimensional intervention, on the  
4 basis of patients' individual PROs, and those patients receiving usual supportive  
5 treatment. Outcomes were assessed at baseline (i.e. visit [V] 1) and after 3 weeks (V2),  
6 6 (V3) and 9 (V4) weeks. Follow-up was conducted 21 (V5), 35 (V6) and 61 (V7) weeks  
7 after baseline. Primary objective was the explorative comparison of QoL-change after  
8 nine weeks (V4) between interventional arm and control arm. Secondary objectives  
9 included explorative comparison between other PRO such as anxiety, depression, pain  
10 as well as survival. Furthermore, factors that predict QoL after nine weeks were  
11 explored.  
12  
13  
14  
15  
16  
17  
18  
19  
20  
21  
22  
23  
24  
25

## 26 **Intervention**

27  
28 Patients in the control arm (CA) received only electronic PRO-assessment without  
29 feedback to the treatment team. Patients treated in the interventional arm (IA) received  
30 a comprehensive four-step evaluation comprising: 1) PRO were assessed electronically  
31 via handheld tablet-PCs at each visit; 2) a case vignette was created based on the  
32 obtained PRO and clinical data at baseline; 3) supportive care recommendations were  
33 consented during discussion on patients' vignettes in a multi-professional expert panel;  
34 and 4) these treatment-suggestions as well as graphical representation of obtained PRO  
35 were provided to the treating physicians prior to V2 in the interventional center.  
36 Clinicians in the IA had the opportunity to discuss the graphical presentation with their  
37 patients and initiate the treatment suggestions. The expert panel consisted of experts in  
38 the field of oncology, palliative care, social work, nursing, psycho-oncology as well as a  
39 patient advocate.  
40  
41  
42  
43  
44  
45  
46  
47  
48  
49  
50  
51  
52  
53  
54  
55  
56  
57  
58  
59  
60



## Randomization

Six German centers were cluster-randomized in a 1:1 ratio in an IA (3 centers) and a CA (3 centers). This trial was designed as a cluster-randomized trials to avoid contamination that might result in a type 2 error. If randomized on patient level, contamination might have been occurred as patients talked to each other about the recommendations or the treating physician transferred recommendations from one patient to another. Randomization was conducted by a colleague not actively involved in this trial using random numbers generated in excel.

The seventh center where the supportive care recommendations were created served as a reference center (RC). Patients treated at the RC received the same intervention as in the IA but were analyzed separately. The RC was invented in order to avoid bias from a dual role of participating clinicians as being part of treatment staff in the center and taking part in the expert panel at the same time. Furthermore, we initiated the RC at first center in order to get to know and solve any technical or logistical barriers in a mono-center setting before spreading it to a multi-center setting.

## Outcome measures

The primary outcome explored the changes of patients QoL in IA and CA after nine weeks of treatment as measured with the Functional Assessment for Cancer Therapy (FACT-G) total score. Nine weeks was set as time for primary outcome assessment since this period provides enough time to take action concerning interventional proposals. The FACT-G is a PRO measure used to assess health-related QoL in

patients undergoing cancer therapy as a total sum score (ranging from 0 to 108) comprising four subscales of QoL (physical, social, emotional, functional well-being).<sup>26</sup> Furthermore, we evaluated the number of patients with a clinical improvement between V1 and V4. This equals a change in the FACT-G total score of at least 3.3 points in order to represent a minimal clinical important difference (MCID). Additionally, the time until QoL deterioration (TUD) was also assessed as a change of at least 3.3 points between V1 and V4 as defined by King *et al.*<sup>27</sup> Analyses of long-term effects included the data collected from V1 until the end of the study at week 67 (V7). Visit schedule and outcomes of all secondary endpoints measured throughout the study are depicted in Table 1.

**Table 1: Visit schedule and outcomes**

| Study period                                                 | Intervention phase |   |   |   | Follow up phase |    |    |
|--------------------------------------------------------------|--------------------|---|---|---|-----------------|----|----|
| Visit                                                        | 1                  | 2 | 3 | 4 | 5               | 6  | 7  |
| Week (+/- 3 days)                                            | 0                  | 3 | 6 | 9 |                 |    |    |
| Week (+/- 1 week)                                            |                    |   |   |   | 21              | 35 | 61 |
| Concomitant medication                                       | x                  | x | x | x | x               | x  | x  |
| FACT-G                                                       | x                  | x | x | x | x               | x  | x  |
| MDASI                                                        | x                  | x | x | x | x               | x  | x  |
| FAACT                                                        | x                  |   |   | x | x               | x  | x  |
| BPI                                                          | x                  |   |   | x | x               | x  | x  |
| IN-PATSAT32*                                                 | x                  |   |   | x | x               | x  | x  |
| HADS                                                         | x                  |   |   | x | x               | x  | x  |
| Tumor-specific & socio-demographic parameters                | x                  |   |   | x | x               | x  | x  |
| Feasibility Scoring based on patients' and doctors' opinion* |                    |   |   | x |                 |    |    |

\* Data is currently being analyzed and is available upon request.

Secondary outcomes included the subscales of the FACT-G questionnaire: physical (range: 0-28), emotional (range: 0-24), functional (range: 0-28), and social well-being (range: 0-28) explored at V4 and during follow up (i.e. V7).<sup>24</sup> Moreover, the effect size of the intervention was measured as COHEN's *d* test by measuring the difference between

1  
2  
3 two means.<sup>28</sup> The M.D. Anderson Symptom Inventory (MDASI) was used to measure  
4 the severity of 13 cancer-related symptoms and their impact on six dimensions of daily  
5 life.<sup>29</sup> Psychological distress was evaluated by the Hospital Anxiety and Depression  
6 scale (HADS).<sup>30</sup> It provided a total sum score (range: 0-42) and two self-rating subscales  
7 for anxiety and depression (range: 0-21). HADS also identified clinically relevant cases  
8 of anxiety and depression using pre-determined cut-off scores.<sup>31</sup> The Functional  
9 Assessment of Anorexia/Cachexia Therapy questionnaire (FAACT) measured the  
10 impact of cachexia and anorexia on patients' QoL.<sup>32</sup> Finally, the Brief Pain Inventory  
11 (BPI) in a scale range from 0-10 measured the intensity of pain and pain-related  
12 interference. <sup>33</sup> We assessed the predictive value of the following variables at V1 for  
13 QoL: gender, age, performance status (ECOG), tumor stage (UICC-classification),  
14 symptom severity (MDASI), symptom interference (MDASI), depression (HADS), anxiety  
15 (HADS), patients satisfaction (IN-PATSAT32)<sup>34</sup>, anorexia/cachexia (FAACT).  
16  
17  
18  
19  
20  
21  
22  
23  
24  
25  
26  
27  
28  
29  
30  
31  
32  
33  
34

### 35 **Statistical considerations**

36  
37 The patients sample size was calculated for an explorative purpose. We assumed the  
38 superiority of our intervention concerning FACT-G total score. Type I error was set to  
39  $\alpha=0.05$  (one-sided), with a statistical power of  $1-\beta=0.80$  and a medium effect<sup>27</sup> between  
40 the groups in FACT-G=15, with an estimated standard deviation (SD) of  $\sigma=17$  and a  
41 conservatively estimated intra-cluster-correlation coefficient of  $P=0.1$ .<sup>35</sup> This calculation  
42 resulted in a cluster size of 11 patients. Additionally, 11 patients were recruited in the  
43 reference center, for a total of 77 patients.  
44  
45  
46  
47  
48  
49  
50  
51  
52

53 The Full Analysis Set (FAS) comprised all patients included in the study and  
54  
55

1  
2  
3 allocated to a treatment group irrespective of their compliance with the planned course  
4 of treatment (intention-to-treat principle). Analyses of efficacy endpoints were performed  
5 on the per-protocol analysis set (PPS) defined as the subset of patients of the FAS who  
6 have provided complete data at the first (V1) and last visit (V4) and who had no major  
7 protocol deviations.  
8  
9  
10  
11  
12  
13

14 Survival was assessed as means of PFS and overall survival (OS). The PFS and  
15 OS analyses were defined as the time interval from the first administration of trabectedin  
16 to the earliest date of disease progression or death, regardless of cause (whichever  
17 occurred first) for PFS, whereas OS was defined as the time between the start of  
18 trabectedin and patient death from any cause. Patients were censored after the  
19 discontinuation of their study participation. Means of PFS and OS are reported to  
20 provide the ability to describe and compare the arms, as median value of OS is not  
21 defined for confidence interval (CI) within the observation period of this study. Mann-  
22 Whitney-U, Fisher-exact test, and Chi-squared test were used for the detection of  
23 possible differences concerning demographics. T-test was applied to detect possible  
24 differences between metric outcomes, whereas linear univariate and multivariate  
25 regression were calculated to identify determinants of QoL at V4.  
26  
27  
28  
29  
30  
31  
32  
33  
34  
35  
36  
37  
38  
39  
40  
41  
42  
43  
44  
45  
46  
47  
48  
49  
50  
51  
52  
53  
54  
55  
56  
57  
58  
59  
60

## RESULTS

### Patients and treatment arms

Between September 2014 and March 2018, 80 patients from seven sites were screened for study participation (figure 1). The FAS encompasses 79 patients, as one patient had to be excluded from analysis due to protocol violation. In the FAS, mean age was 58 years (range: 22-86). Leiomyosarcoma ( $n=32$ ) and liposarcoma ( $n=23$ ) were the most prevalent histological type of sarcomas. At baseline, the IA included 38 patients (19 of whom included in PPS), while CA consists of 29 patients (14 of whom included in PPS). No difference concerning age, gender and the number of previous cycles of trabectedin was observed between the arms. In the CA more patients had a higher tumor stage ( $P=0.083$ ) and less patients suffer from leiomyosarcoma (Table 2).

**Table 2. Patient characteristic at baseline**

|                                | Interventional arm (IA; 3 centers)<br><i>N</i> =38 | Control arm (CA; 3 centers)<br><i>N</i> =29 | Reference Center (RF; 1 center)<br><i>N</i> =12 | Full Analysis Set<br><i>N</i> =79 |
|--------------------------------|----------------------------------------------------|---------------------------------------------|-------------------------------------------------|-----------------------------------|
| <b>Full Analysis Set (FAS)</b> |                                                    |                                             |                                                 |                                   |
| <b>Gender</b>                  |                                                    |                                             |                                                 |                                   |
| Male                           | 20                                                 | 15                                          | 6                                               | 41                                |
| Female                         | 18                                                 | 14                                          | 6                                               | 38                                |
| <b>Age</b>                     |                                                    |                                             |                                                 |                                   |
| Mean (SD)                      | 58 (12)                                            | 56 (15)                                     | 63 (16)                                         | 58 (14)                           |
| Range (years)                  | 38-87                                              | 22-80                                       | 34-82                                           | 22-87                             |
| <b>Tumor histology</b>         |                                                    |                                             |                                                 |                                   |
| Leiomyosarcoma                 | 19                                                 | 5                                           | 5                                               | 29                                |
| Liposarcoma                    | 6                                                  | 11                                          | 3                                               | 20                                |
| Others*                        | 13                                                 | 12                                          | 4                                               | 29                                |
| missing                        | 0                                                  | 1                                           | 0                                               | 1                                 |
| <b>Metastatic disease</b>      |                                                    |                                             |                                                 |                                   |
| M0                             | 16                                                 | 11                                          | 5                                               | 32                                |
| M1                             | 12                                                 | 16                                          | 7                                               | 35                                |
| missing                        | 10                                                 | 2                                           | 0                                               | 12                                |
| <b>ECOG PS</b>                 |                                                    |                                             |                                                 |                                   |
| 0                              | 20                                                 | 14                                          | 5                                               | 39                                |
| 1                              | 15                                                 | 13                                          | 7                                               | 35                                |
| 2                              | 3                                                  | 0                                           | 0                                               | 3                                 |

|                                                          |                                                 |                                          |                                             |                              |
|----------------------------------------------------------|-------------------------------------------------|------------------------------------------|---------------------------------------------|------------------------------|
| <b>Missing</b>                                           | 0                                               | 2                                        | 0                                           | 2                            |
| <b>Number of previous cycles of trabectedin</b>          |                                                 |                                          |                                             |                              |
| <b>Median</b>                                            | 0                                               | 1                                        | 1                                           | 1                            |
| <b>Range</b>                                             | 0-15                                            | 0-17                                     | 0-11                                        | 0-17                         |
| <b>Number of previous cycles of another chemotherapy</b> |                                                 |                                          |                                             |                              |
| <b>Median</b>                                            | 1.5                                             | 1                                        | 2                                           | 2                            |
| <b>Range</b>                                             | 0-6                                             | 0-5                                      | 1-4                                         | 0-6                          |
| <b>Number of previous lines of another chemotherapy</b>  |                                                 |                                          |                                             |                              |
| <b>Median</b>                                            | 2.5                                             | 2.5                                      | 3                                           | 2                            |
| <b>Range</b>                                             | 0-6                                             | 0-6                                      | 2-5                                         | 0-6                          |
| <b>Per-protocol analysis set (PPS)</b>                   |                                                 |                                          |                                             |                              |
|                                                          | <b>Interventional arm (IA; 3 centers), N=19</b> | <b>Control arm (CA; 3 centers), N=14</b> | <b>Reference Center (RF; 1 center), N=8</b> | <b>Per Protocol Set N=41</b> |
| <b>Gender</b>                                            |                                                 |                                          |                                             |                              |
| <b>Male</b>                                              | 8                                               | 6                                        | 3                                           | 17                           |
| <b>Female</b>                                            | 11                                              | 8                                        | 5                                           | 24                           |
| <b>Age</b>                                               |                                                 |                                          |                                             |                              |
| <b>Mean (SD)</b>                                         | 61 (12)                                         | 55 (15)                                  | 59 (17)                                     | 58 (14)                      |
| <b>Range (years)</b>                                     | 44-87                                           | 30-80                                    | 34-82                                       | 30-87                        |
| <b>Tumor histology</b>                                   |                                                 |                                          |                                             |                              |
| <b>Leiomyosarcoma</b>                                    | 5                                               | 6                                        | 4                                           | 15                           |
| <b>Liposarcoma</b>                                       | 11                                              | 1                                        | 3                                           | 15                           |
| <b>Others*</b>                                           | 3                                               | 7                                        | 1                                           | 11                           |
| <b>missing</b>                                           | 0                                               | 0                                        | 0                                           | 0                            |
| <b>Metastatic disease</b>                                |                                                 |                                          |                                             |                              |
| <b>M0</b>                                                | 8                                               | 5                                        | 2                                           | 15                           |
| <b>M1</b>                                                | 5                                               | 9                                        | 6                                           | 20                           |
| <b>missing</b>                                           | 6                                               | 0                                        | 0                                           | 6                            |
| <b>ECOG PS</b>                                           |                                                 |                                          |                                             |                              |
| <b>0</b>                                                 | 12                                              | 8                                        | 4                                           | 24                           |
| <b>1</b>                                                 | 6                                               | 6                                        | 4                                           | 16                           |
| <b>2</b>                                                 | 1                                               | 0                                        | 0                                           | 1                            |
| <b>Missing</b>                                           | 0                                               | 0                                        | 0                                           | 0                            |
| <b>Number of previous cycles of trabectedin</b>          |                                                 |                                          |                                             |                              |
| <b>Median</b>                                            | 0                                               | 1                                        | 1                                           | 1                            |
| <b>Range</b>                                             | 0-15                                            | 0-7                                      | 1-11                                        | 0-15                         |
| <b>Number of previous cycles of another chemotherapy</b> |                                                 |                                          |                                             |                              |
| <b>Median</b>                                            | 1                                               | 1                                        | 2                                           | 2                            |
| <b>Range</b>                                             | 0-4                                             | 0-3                                      | 2-4                                         | 0-4                          |

\*All subtypes occurring less than four times were merged into this category.

ECOG PS, Eastern Cooperative Oncology Group performance status; SD, standard deviation; M0, no distant metastasis; M1, distant metastasis.

## Primary Outcome

After nine weeks at V4, FACT-G was higher in IA ( $\Delta$  FACT-G total score: -2.4, 95% CI: -9.2-4.5) as compared to the CA ( $\Delta$  FACT-G total score: -3.9, 95% CI: -11.3-3.5;  $P=0.765$ ) (Table 3). The effect size of the intervention on the FACT-G score was  $d=0.269$  (small effect). Intra-cluster correlation was 0. Figure 2 and Supplementary Table 1 depicts absolute FACT-scores trajectories over time. The number of patients experiencing a MCID was equal in both groups (IA: 44% and CA: 43%). The median TUD differed slightly between IA (25 days, 95% CI: 6.2-43.8) and CA (22 days, 95% CI: 16.5-27.5;  $P=0.927$ ).

**Table 3. Change scores after 9 weeks of treatment**

|                                     | Mean change from baseline (V1) to 9 weeks (V4) |             |    |             |             |    | P-value | Interventional trend |
|-------------------------------------|------------------------------------------------|-------------|----|-------------|-------------|----|---------|----------------------|
|                                     | Interventional arm                             |             |    | Control arm |             |    |         |                      |
|                                     | mean                                           | 95% CI      | N  | mean        | 95% CI      | N  |         |                      |
| <b>FACT-G total</b>                 | -2.4                                           | -9.22-4.50  | 18 | -3.9        | -11.29-3.45 | 14 | 0.955   | Beneficial           |
| <b>FACT-G physical well-being</b>   | -1.2                                           | -4.43-2.09  | 18 | -2.2        | -5.40-0.98  | 14 | 0.722   | Beneficial           |
| <b>FACT-G social well-being</b>     | -1.6                                           | -3.06--0.09 | 18 | -0.3        | -2.20-1.71  | 14 | 0.193   | Adverse              |
| <b>FACT-G emotional well-being</b>  | 0.9                                            | -0.62-2.40  | 18 | -0.1        | -2.34-2.06  | 14 | 0.561   | Beneficial           |
| <b>FACT-G functional well-being</b> | -0.5                                           | -2.67-1.67  | 18 | -1.3        | -4.03-1.40  | 14 | 0.536   | Beneficial           |
| <b>HADS depression</b>              | 0.3                                            | -0.64-1.20  | 18 | 0.2         | -2.05-2.47  | 14 | 0.419   | Equivalent           |
| <b>HADS anxiety</b>                 | 0.3                                            | -1.65-2.23  | 18 | -0.8        | -2.99-1.41  | 14 | 0.710   | Adverse              |
| <b>BPI average pain</b>             | 0.6                                            | -0.34-1.50  | 19 | 0.2         | -0.54-0.96  | 14 | 0.788   | Adverse              |
| <b>BPI pain interference</b>        | 0.4                                            | -0.31-1.05  | 18 | 0.1         | -0.51-0.71  | 13 | 0.679   | Adverse              |
| <b>MDASI symptom severity</b>       | 0.7                                            | -0.08-1.39  | 18 | 0.2         | -0.38-0.82  | 14 | 0.442   | Adverse              |
| <b>MDASI symptom interference</b>   | 1.2                                            | 0.89-1.59   | 18 | 0.8         | -0.37-1.90  | 13 | 0.667   | Adverse              |

BPI. Brief Pain Inventory; CI, confidence interval; FACT-G. Functional Assessment for Cancer Therapy; HADS. Hospital Anxiety and Depression scale; MDASI. The M.D. Anderson Symptom Inventory; V. visit; N. number of evaluable patients in respective cluster.

## Secondary Outcomes

Regarding the change of QoL between V1 and V4 (as well as during follow up V7), there was a beneficial impact of the patient-tailored intervention in IA in all FACT-G subscales except for social well-being (Figure 2). There was less decline in physical well-being subscale in IA ( $\Delta$  FACT-G PWB: -1.2, 95% CI: -4,43-2,09) than in CA ( $\Delta$  FACT-G PWB: -2.2, 95% CI: -5,40-0,98;  $P=0.926$ ). Emotional well-being subscale improved slightly in IA ( $\Delta$  FACT-G EWB: 0.9, 95% CI: -0,62-2,40) and remained almost stable in CA ( $\Delta$  FACT-G EWB: -0.1, 95% CI: -2,34-2,06;  $P=0.561$ ). Functional well-being subscale declined less in IA ( $\Delta$  FACT-G FWB: -0.5, 95% CI: -2,67-1,67) than in CA ( $\Delta$  FACT-G FWB: -1.3, 95% CI: -4,03-1,40;  $P=0.536$ ). Lastly, social well-being subscale remained almost stable ( $\Delta$  FACT-G SWB: -0.2, 95% CI: -3,06- -0,09) in CA while decreasing in IA ( $\Delta$  FACT-G SWB: -1.6, 95% CI: -2,20-1,71;  $P=0.952$ ). Overall, there were non-significant, adverse trends in other domains of PRO (MDASI, FFACT, HADS and BPI scales) (Table 3 and Supplementary Table 2).

Overall mean OS was longer in IA than in CA (648 vs. 389 days) without reaching statistical significance ( $P=0.110$ ), while means of PFS were almost identical in IA and CA (249 vs. 232 days;  $P=0.899$ ).

## QoL-Prediction

Univariate regressions revealed that each of the following variables determined the FACT-G total score: symptom severity, symptom interference, depression and anxiety. No influence on the FACT-G total score was found for age, gender, ECOG performance status, patient-satisfaction, anorexia and cachexia (Table 4). In a multivariable



regression, depression was determined variable for the FACT-G total score (Table 4).

**Table 4. Univariate and multiple regression of FACT-G total score after nine weeks (V4) on parameters measured at baseline (V1) over all groups**

| <b>Univariate regression</b> |                 |          |                         |
|------------------------------|-----------------|----------|-------------------------|
|                              | <i>P</i> -value | estimate | 95% confidence interval |
| <b>Gender</b>                | 0.154           | 7.5      | -2.8 to 17.8            |
| <b>Age</b>                   | 0.228           | -0.2     | -0.5 to 0.1             |
| <b>ECOG PS</b>               | 0.509           | -3.2     | -12.7 to 6.3            |
| <b>Tumor stage</b>           | 0.284           | -1.8     | -5.1 to 1.5             |
| <b>Symptom severity</b>      | 0.0             | -6.6     | -10.5 to -2.7           |
| <b>Symptom interference</b>  | 0.011           | -3.4     | -6.0 to -0.8            |
| <b>Depression</b>            | 0.0             | -2.7     | -4.3 to -1.1            |
| <b>Anxiety</b>               | 0.034           | -1.4     | -2.7 to -0.1            |
| <b>Patient Satisfaction</b>  | 0.451           | 3.0      | -4.8 to 10.8            |
| <b>Anorexia/Cachexia</b>     | 0.143           | 0.8      | -0.3 to 1.9             |
| <b>Multiple regression</b>   |                 |          |                         |
|                              | <i>P</i> -value | estimate | 95% confidence interval |
| <b>Gender</b>                | 0.844           | 1.0      | -7.2 to 9.4             |
| <b>Age</b>                   | 0.103           | -0.3     | -0.6 to 0.1             |
| <b>ECOG PS</b>               | 0.746           | 1.5      | -6.1 to 9.1             |
| <b>Tumor stage</b>           | 0.586           | -0.8     | -3.4 to 1.7             |
| <b>Symptom severity</b>      | 0.079           | -4.4     | -8.3 to -0.2            |
| <b>Symptom interference</b>  | 0.744           | 0.5      | -1.8 to 2.8             |
| <b>Depression</b>            | 0.025           | -2.2     | -3.9 to -0.7            |
| <b>Anxiety</b>               | 0.869           | -0.1     | -1.5 to 1.3             |
| <b>Patient Satisfaction</b>  | 0.437           | -0.1     | -0.4 to 0.1             |
| <b>Anorexia/Cachexia</b>     | 0.161           | -0.9     | -2.0 to 0.2             |

ECOG PS, Eastern Cooperative Oncology Group performance status.

## DISCUSSION

### Principal findings

To the best of our knowledge, this is the first randomized trial using a patient-directed supportive care intervention to improve QoL and other PRO in sarcoma patients. We observed a trend in favor of the intervention considering the primary endpoint (total FACT-G score) and other secondary outcomes (i.e. physical, functional and emotional well-being QoL subscales). On the other side, MCID and TUD assessments slightly differed between the arms. Not surprisingly and due to the character of palliative disease, absolute numbers in FACT-G-score decline over time. This change is well in line with findings from a multi-center randomized trial, which reported a comparable decline in FACT-G score of ~2 in 281 patients suffering from advanced solid cancers who received early palliative care or standard oncologic care.<sup>36</sup> In addition, the total FACT-G score they observed after twelve weeks (70.1 and 69.6) was comparable to the score found in IA (73.9) and CA (69.4) after nine week of treatment. The total FACT-G score (76.4) was also comparable to the YonLife baseline score (74.2) in a sample of 42 patients suffering from different sarcoma histotypes in a single center, cross-sectional study.<sup>37</sup>

As the intervention yields beneficial effects on QoL, it seemed adverse on symptom domains such as average pain, as well as anxiety and depression. For the former, the applied intervention might not have been timely enough, as adequate pain management needs immediate action instead of recommendation that take several days. Complex syndromes such as anxiety and depression need ongoing treatment, either psycho-oncological or pharmaceutical, which usually take more time to be

1  
2  
3 effective.  
4  
5  
6

### 7 **YonLife-intervention - unanswered questions and future research**

8  
9  
10 There are still many unanswered questions regarding comprehensive QoL interventions.  
11  
12 During the past years, several reports with different interventions tried to shed some  
13  
14 more light on this issue. The YonLife intervention incorporates aspects of other  
15  
16 programs like providing treating physician with pre-collected PROs<sup>17, 24</sup> and, creating a  
17  
18 QoL-profile and using expert's recommendations.<sup>19</sup> In contrast, unlike recently evolving  
19  
20 programs<sup>38</sup>, YonLife did not provide possibility to answer questions using web based  
21  
22 questionnaires accessible from home or mobile device. Furthermore, the PRO-results  
23  
24 were automatically calculated, but were not automatically compared to pre-defined cut-  
25  
26 off or norm data nor were they available in the clinic information system like in other  
27  
28 projects.<sup>39, 40</sup> Thus, the described YonLife intervention needed human support to create  
29  
30 the case vignette that limits the application to busy clinical routine. Advancing technical  
31  
32 opportunities could help overcoming these barriers. YonLife also provided  
33  
34 recommendations thoroughly based on electronic capturing of PRO. Yet, it  
35  
36 demonstrated to be beneficial on QoL in contrast to a palliative intervention based on  
37  
38 the personal encounter.<sup>36</sup> This could be even more relevant in a rare disease such as  
39  
40 sarcoma care, where patients regularly travel long distances to specialized sarcoma  
41  
42 centers.  
43  
44  
45  
46  
47  
48  
49  
50

### 51 **Weaknesses and strengths**

52  
53 Our study has several limitations. As no preceding studies that incorporate a PRO-  
54  
55

1  
2  
3 based individualized intervention existed, our study design and the sample size were set  
4  
5 only for an explorative purpose. Therefore, results were determined to fail statistical  
6  
7 significance and should be interpreted with caution. Furthermore, sarcoma-specific QoL  
8  
9 or symptom-measures are still missing, while the FACT-G and MDASI are generic  
10  
11 instruments, which might not cover syndromes and aspects specific for sarcoma  
12  
13 patients. On the other hand, to overcome the obstacles of limited statistical power, we  
14  
15 applied measures of clinical rather than statistical importance such as the MCID or TUD,  
16  
17 which might be even more important to clinicians in daily practice. Effect sizes are now  
18  
19 available for calculating sample sizes in a larger confirmatory trial.  
20  
21  
22

23  
24 In conclusion, the YonLife trial adds essential knowledge to the scarce data on  
25  
26 PRO in patients with advanced STS. Unlike previous work, it is the first trial that applies  
27  
28 an electronic PRO-assessment and a remote tailored intervention of patients with STS.  
29  
30 Our data suggest that incorporation of validated QoL measures in STS clinical treatment  
31  
32 may further improve the care and understanding of patient wellbeing beyond traditional  
33  
34 clinical measures. Additionally, beyond proving the statistical significance of clinically  
35  
36 important effects, this study is an important prerequisite for future research and holistic  
37  
38 care of patients with advanced STS.  
39  
40  
41  
42  
43  
44  
45  
46  
47  
48  
49  
50  
51  
52  
53  
54  
55  
56  
57  
58  
59  
60

## CONTRIBUTORS

LH and MKS proposed the conception and design of the study, performed data analysis, interpretation and quality control of data and algorithms. MB, LH and MKS are responsible for the manuscript editing. MKS, SR, HGK, BK, AK, VG, TK, UP and JMC performed the data acquisition. All aforementioned authors as well as US, JF, AS, BH and KA participated in the manuscript drafting and review with equal contribution.

## FUNDING

This work was supported by an unrestricted grant from PharmaMar, Spain.

## DATA AVAILABILITY STATEMENT

Complete data sets are available upon reasonable request

## COMPETING INTERESTS

None declared.

## ACKNOWLEDGEMENTS

The trial was coordinated by GWT-TUD, Dresden, Germany. We acknowledge the German Interdisciplinary Sarcoma Group (GISG) for providing support for this trial. The YonLife trial was associated with the German Interdisciplinary Sarcoma Group as GISG-12 project and as AIO-STS-0215 within the 'Arbeitsgemeinschaft Internistische Onkologie' of the 'Deutsche Krebsgesellschaft' (DKG). We would also like to thank Michael Kramer, Kristian Zinke and Rocco Haase for their support on statistical aspects

1  
2  
3  
4  
5  
6  
7  
8  
9  
10  
11  
12  
13  
14  
15  
16  
17  
18  
19  
20  
21  
22  
23  
24  
25  
26  
27  
28  
29  
30  
31  
32  
33  
34  
35  
36  
37  
38  
39  
40  
41  
42  
43  
44  
45  
46  
47  
48  
49  
50  
51  
52  
53  
54  
55  
56  
57  
58  
59  
60

of the study and Felicitas Lenz and Adnan Tanović for proof-reading.

For peer review only

## REFERENCES

1. Gough, N.J., et al., *Symptom burden, survival and palliative care in advanced soft tissue sarcoma*. *Sarcoma*, 2011. **2011**: p. 325189.
2. Reichardt, P., et al., *Quality of Life and Utility in Patients with Metastatic Soft Tissue and Bone Sarcoma: The Sarcoma Treatment and Burden of Illness in North America and Europe (SABINE) Study*. *Sarcoma*, 2012. **2012**: p. 740279.
3. Storey, L., et al., *A Critical Review of the Impact of Sarcoma on Psychosocial Wellbeing*. *Sarcoma*, 2019. **2019**: p. 9730867.
4. McDonough, J., et al., *Health-related quality of life, psychosocial functioning, and unmet health needs in patients with sarcoma: A systematic review*. *Psychooncology*, 2019. **28**(4): p. 653-664.
5. Ostacoli, L., et al., *Quality of life, anxiety and depression in soft tissue sarcomas as compared to more common tumours: an observational study*. *Appl. Res. Qual. Life*, 2014. **9**(1): p. 123-131.
6. Tang, M.H., et al., *A systematic review of the recent quality of life studies in adult extremity sarcoma survivors*. *Sarcoma*, 2012. **2012**: p. 171342.
7. Paredes, T., et al., *Quality of life of sarcoma patients from diagnosis to treatments: predictors and longitudinal trajectories*. *Eur J Oncol Nurs*, 2011. **15**(5): p. 492-9.
8. Casali, P.G., et al., *Soft tissue and visceral sarcomas: ESMO-EURACAN Clinical Practice Guidelines for diagnosis, treatment and follow-up*. *Ann Oncol*, 2018. **29**(Supplement\_4): p. iv268-iv269.

- 1  
2  
3 9. Blay, J.Y., et al., *International expert opinion on patient-tailored management of*  
4 *soft tissue sarcomas*. Eur J Cancer, 2014. **50**(4): p. 679-89.
- 5  
6  
7  
8 10. Bonnetain, F., et al., *Time until definitive quality of life score deterioration as a*  
9 *means of longitudinal analysis for treatment trials in patients with metastatic*  
10 *pancreatic adenocarcinoma*. Eur J Cancer, 2010. **46**(15): p. 2753-62.
- 11  
12  
13  
14 11. D'Incalci, M., et al., *Unique features of the mode of action of ET-743*. Oncologist,  
15 2002. **7**(3): p. 210-6.
- 16  
17  
18  
19 12. Larsen, A.K., C.M. Galmarini, and M. D'Incalci, *Unique features of trabectedin*  
20 *mechanism of action*. Cancer Chemother Pharmacol, 2016. **77**(4): p. 663-71.
- 21  
22  
23  
24 13. Demetri, G.D., et al., *Efficacy and safety of trabectedin in patients with advanced*  
25 *or metastatic liposarcoma or leiomyosarcoma after failure of prior anthracyclines*  
26 *and ifosfamide: results of a randomized phase II study of two different schedules*.  
27 J Clin Oncol, 2009. **27**(25): p. 4188-96.
- 28  
29  
30  
31  
32  
33 14. Demetri, G.D., et al., *Efficacy and safety of trabectedin or dacarbazine for*  
34 *metastatic liposarcoma or leiomyosarcoma after failure of conventional*  
35 *chemotherapy: results of a phase III randomized multicenter clinical trial*. J Clin  
36 Oncol, 2016. **34**(8): p. 786-93.
- 37  
38  
39  
40  
41  
42 15. Jones, R.L., et al., *Safety and efficacy of trabectedin when administered in the*  
43 *inpatient versus outpatient setting: Clinical considerations for outpatient*  
44 *administration of trabectedin*. Cancer, 2019. **125**(24): p. 4435-4441.
- 45  
46  
47  
48  
49 16. Basch, E., et al., *Overall Survival Results of a Trial Assessing Patient-Reported*  
50 *Outcomes for Symptom Monitoring During Routine Cancer Treatment*. JAMA,  
51 2017. **318**(2): p. 197-198.
- 52  
53  
54  
55



17. Basch, E., et al., *Symptom Monitoring With Patient-Reported Outcomes During Routine Cancer Treatment: A Randomized Controlled Trial*. J Clin Oncol, 2016. **34**(6): p. 557-65.
18. Berry, D.L., et al., *Electronic self-report assessment for cancer and self-care support: results of a multicenter randomized trial*. J Clin Oncol, 2014. **32**(3): p. 199-205.
19. Klinkhammer-Schalke, M., et al., *Direct improvement of quality of life using a tailored quality of life diagnosis and therapy pathway: randomised trial in 200 women with breast cancer*. Br J Cancer, 2012. **106**(5): p. 826-38.
20. Ruland, C.M., et al., *Effects of a computerized system to support shared decision making in symptom management of cancer patients: preliminary results*. J Am Med Inform Assoc, 2003. **10**(6): p. 573-9.
21. Yount, S.E., et al., *A randomized trial of weekly symptom telemonitoring in advanced lung cancer*. J Pain Symptom Manage, 2014. **47**(6): p. 973-89.
22. Winnette, R., et al., *The Patient Experience with Soft Tissue Sarcoma: A Systematic Review of the Literature*. Patient, 2017. **10**(2): p. 153-162.
23. Velikova, G., et al., *Measuring quality of life in routine oncology practice improves communication and patient well-being: a randomized controlled trial*. J Clin Oncol, 2004. **22**(4): p. 714-24.
24. Strasser, F., et al., *The effect of real-time electronic monitoring of patient-reported symptoms and clinical syndromes in outpatient workflow of medical oncologists: E-MOSAIC, a multicenter cluster-randomized phase III study (SAKK 95/06)*. Ann Oncol, 2016. **27**(2): p. 324-32.

- 1  
2  
3 25. Schuler, M., et al., *A cluster-randomised, controlled proof-of-concept study to*  
4 *explore the feasibility and effect of a patient-directed intervention on quality of life*  
5 *in patients with advanced soft tissue sarcoma.* BMJ Open, 2017. **7**(6): p.  
6 e014614.  
7  
8  
9
- 10  
11  
12 26. Cella, D.F., et al., *The Functional Assessment of Cancer Therapy scale:*  
13 *development and validation of the general measure.* J Clin Oncol, 1993. **11**(3): p.  
14 570-9.  
15  
16  
17
- 18  
19 27. King, M.T., et al., *Meta-analysis provides evidence-based interpretation*  
20 *guidelines for the clinical significance of mean differences for the FACT-G, a*  
21 *cancer-specific quality of life questionnaire.* Patient Relat Outcome Meas, 2010.  
22 **1**: p. 119-26.  
23  
24  
25  
26  
27
- 28 28. Cohen, J., *Statistical Power for the Behavioral Sciences (2<sup>nd</sup> Edition).* Lawrence  
29 Erlbaum Associates, 1988.  
30  
31
- 32  
33 29. Cleeland, C.S., et al., *Assessing symptom distress in cancer patients: the M.D.*  
34 *Anderson Symptom Inventory.* Cancer, 2000. **89**(7): p. 1634-46.  
35  
36  
37
- 38 30. Zigmond, A.S. and R.P. Snaith, *The hospital anxiety and depression scale.* Acta  
39 Psychiatr Scand, 1983. **67**(6): p. 361-70.  
40  
41
- 42 31. Singer, S., et al., *Hospital anxiety and depression scale cutoff scores for cancer*  
43 *patients in acute care.* Br J Cancer, 2009. **100**(6): p. 908-12.  
44  
45  
46
- 47 32. Ribaldo, J.M., et al., *Re-validation and shortening of the Functional Assessment*  
48 *of Anorexia/Cachexia Therapy (FAACT) questionnaire.* Qual Life Res, 2000.  
49 **9**(10): p. 1137-46.  
50  
51  
52  
53  
54  
55  
56  
57  
58  
59  
60

- 1  
2  
3 33. Radbruch, L., et al., *Validation of the German version of the Brief Pain Inventory*.  
4  
5 J Pain Symptom Manage, 1999. **18**(3): p. 180-7.  
6  
7  
8 34. Bredart, A., et al., *An international prospective study of the EORTC cancer in-*  
9  
10 *patient satisfaction with care measure (EORTC IN-PATSAT32)*. Eur J Cancer,  
11  
12 2005. **41**(14): p. 2120-31.  
13  
14  
15 35. Brucker, P.S., et al., *General population and cancer patient norms for the*  
16  
17 *Functional Assessment of Cancer Therapy-General (FACT-G)*. Eval Health Prof,  
18  
19 2005. **28**(2): p. 192-211.  
20  
21  
22 36. Franciosi, V., et al., *Early palliative care and quality of life of advanced cancer*  
23  
24 *patients-a multicenter randomized clinical trial*. Ann Palliat Med, 2019. **8**(4): p.  
25  
26 381-389.  
27  
28  
29 37. Chan, A., et al., *Symptom burden and medication use in adult sarcoma patients*.  
30  
31 Support Care Cancer, 2015. **23**(6): p. 1709-17.  
32  
33  
34 38. Warrington, L., et al., *Online tool for monitoring adverse events in patients with*  
35  
36 *cancer during treatment (eRAPID): field testing in a clinical setting*. BMJ Open,  
37  
38 2019. **9**(1): p. e025185.  
39  
40  
41 39. Schuler, M.K., et al., *Implementation of a mobile inpatient quality of life (QoL)*  
42  
43 *assessment for oncology nursing*. Support Care Cancer, 2016. **24**(8): p. 3391-9.  
44  
45  
46 40. Schuler, M., et al., *Implementation and first results of a tablet-based assessment*  
47  
48 *referring to patient-reported outcomes in an inpatient cancer care unit*. Z Evid  
49  
50 Fortbild Qual Gesundheitswes, 2017. **121**: p. 64-72.  
51  
52  
53  
54  
55  
56  
57  
58  
59  
60

1  
2  
3  
4  
5  
6  
7  
8  
9  
10  
11  
12  
13  
14  
15  
16  
17  
18  
19  
20  
21  
22  
23  
24  
25  
26  
27  
28  
29  
30  
31  
32  
33  
34  
35  
36  
37  
38  
39  
40  
41  
42  
43  
44  
45  
46  
47  
48  
49  
50  
51  
52  
53  
54  
55  
56  
57  
58  
59  
60

| <b>Table 1: Visit schedule and outcomes</b>                  |            |                           |          |          |           |                        |           |
|--------------------------------------------------------------|------------|---------------------------|----------|----------|-----------|------------------------|-----------|
| <b>Study period</b>                                          | <b>SCR</b> | <b>Intervention phase</b> |          |          |           | <b>Follow up phase</b> |           |
| <b>Visit</b>                                                 | <b>1</b>   | <b>2</b>                  | <b>3</b> | <b>4</b> | <b>5</b>  | <b>6</b>               | <b>7</b>  |
| <b>Week (+/- 3 days)</b>                                     | <b>0</b>   | <b>3</b>                  | <b>6</b> | <b>9</b> |           |                        |           |
| <b>Week (+/- 1 week)</b>                                     |            |                           |          |          | <b>21</b> | <b>35</b>              | <b>61</b> |
| Concomitant medication                                       | x          | x                         | x        | x        | x         | x                      | x         |
| FACT-G                                                       | x          | x                         | x        | x        | x         | x                      | x         |
| MDASI                                                        | x          | x                         | x        | x        | x         | x                      | x         |
| FAACT                                                        | x          |                           |          | x        | x         | x                      | x         |
| BPI                                                          | x          |                           |          | x        | x         | x                      | x         |
| IN-PATSAT32*                                                 | x          |                           |          | x        | x         | x                      | x         |
| HADS                                                         | x          |                           |          | x        | x         | x                      | x         |
| Tumor-specific & socio-demographic parameters                | x          |                           |          | x        | x         | x                      | x         |
| Feasibility Scoring based on patients' and doctors' opinion* |            |                           |          | x        |           |                        |           |

\* Data is currently being analyzed and is available upon request.

Table 2. Patient characteristic at baseline

|                                                          | Interventional arm (IA; 3 centers)<br>N=38  | Control arm (CA; 3 centers)<br>N=29  | Reference Center (RF; 1 center)<br>N=12 | Full Analysis Set<br>N=79 |
|----------------------------------------------------------|---------------------------------------------|--------------------------------------|-----------------------------------------|---------------------------|
| <b>Full Analysis Set (FAS)</b>                           |                                             |                                      |                                         |                           |
| <b>Gender</b>                                            |                                             |                                      |                                         |                           |
| Male                                                     | 20                                          | 15                                   | 6                                       | 41                        |
| Female                                                   | 18                                          | 14                                   | 6                                       | 38                        |
| <b>Age</b>                                               |                                             |                                      |                                         |                           |
| Mean (SD)                                                | 58 (12)                                     | 56 (15)                              | 63 (16)                                 | 58 (14)                   |
| Range (years)                                            | 38-87                                       | 22-80                                | 34-82                                   | 22-87                     |
| <b>Tumor histology</b>                                   |                                             |                                      |                                         |                           |
| Leiomyosarcoma                                           | 19                                          | 5                                    | 5                                       | 29                        |
| Liposarcoma                                              | 6                                           | 11                                   | 3                                       | 20                        |
| Others*                                                  | 13                                          | 12                                   | 4                                       | 29                        |
| missing                                                  | 0                                           | 1                                    | 0                                       | 1                         |
| <b>Metastatic disease</b>                                |                                             |                                      |                                         |                           |
| M0                                                       | 16                                          | 11                                   | 5                                       | 32                        |
| M1                                                       | 12                                          | 16                                   | 7                                       | 35                        |
| missing                                                  | 10                                          | 2                                    | 0                                       | 12                        |
| <b>ECOG PS</b>                                           |                                             |                                      |                                         |                           |
| 0                                                        | 20                                          | 14                                   | 5                                       | 39                        |
| 1                                                        | 15                                          | 13                                   | 7                                       | 35                        |
| 2                                                        | 3                                           | 0                                    | 0                                       | 3                         |
| Missing                                                  | 0                                           | 2                                    | 0                                       | 2                         |
| <b>Number of previous cycles of trabectedin</b>          |                                             |                                      |                                         |                           |
| Median                                                   | 0                                           | 1                                    | 1                                       | 1                         |
| Range                                                    | 0-15                                        | 0-17                                 | 0-11                                    | 0-17                      |
| <b>Number of previous cycles of another chemotherapy</b> |                                             |                                      |                                         |                           |
| Median                                                   | 1.5                                         | 1                                    | 2                                       | 2                         |
| Range                                                    | 0-6                                         | 0-5                                  | 1-4                                     | 0-6                       |
| <b>Number of previous lines of another chemotherapy</b>  |                                             |                                      |                                         |                           |
| Median                                                   | 2.5                                         | 2.5                                  | 3                                       | 2                         |
| Range                                                    | 0-6                                         | 0-6                                  | 2-5                                     | 0-6                       |
| <b>Per-protocol analysis set (PPS)</b>                   |                                             |                                      |                                         |                           |
|                                                          | Interventional arm (IA; 3 centers),<br>N=19 | Control arm (CA; 3 centers),<br>N=14 | Reference Center (RF; 1 center),<br>N=8 | Per Protocol Set<br>N=41  |
| <b>Gender</b>                                            |                                             |                                      |                                         |                           |
| Male                                                     | 8                                           | 6                                    | 3                                       | 17                        |
| Female                                                   | 11                                          | 8                                    | 5                                       | 24                        |
| <b>Age</b>                                               |                                             |                                      |                                         |                           |
| Mean (SD)                                                | 61 (12)                                     | 55 (15)                              | 59 (17)                                 | 58 (14)                   |
| Range (years)                                            | 44-87                                       | 30-80                                | 34-82                                   | 30-87                     |
| <b>Tumor histology</b>                                   |                                             |                                      |                                         |                           |
| Leiomyosarcoma                                           | 5                                           | 6                                    | 4                                       | 15                        |
| Liposarcoma                                              | 11                                          | 1                                    | 3                                       | 15                        |
| Others*                                                  | 3                                           | 7                                    | 1                                       | 11                        |
| missing                                                  | 0                                           | 0                                    | 0                                       | 0                         |
| <b>Metastatic disease</b>                                |                                             |                                      |                                         |                           |
| M0                                                       | 8                                           | 5                                    | 2                                       | 15                        |
| M1                                                       | 5                                           | 9                                    | 6                                       | 20                        |

|                                                          |      |     |      |      |
|----------------------------------------------------------|------|-----|------|------|
| <b>missing</b>                                           | 6    | 0   | 0    | 6    |
| <b>ECOG PS</b>                                           |      |     |      |      |
| <b>0</b>                                                 | 12   | 8   | 4    | 24   |
| <b>1</b>                                                 | 6    | 6   | 4    | 16   |
| <b>2</b>                                                 | 1    | 0   | 0    | 1    |
| <b>Missing</b>                                           | 0    | 0   | 0    | 0    |
| <b>Number of previous cycles of trabectedin</b>          |      |     |      |      |
| <b>Median</b>                                            | 0    | 1   | 1    | 1    |
| <b>Range</b>                                             | 0-15 | 0-7 | 1-11 | 0-15 |
| <b>Number of previous cycles of another chemotherapy</b> |      |     |      |      |
| <b>Median</b>                                            | 1    | 1   | 2    | 2    |
| <b>Range</b>                                             | 0-4  | 0-3 | 2-4  | 0-4  |

\*All subtypes occurring less than four times were merged into this category.

ECOG PS, Eastern Cooperative Oncology Group performance status; SD, standard deviation; M0, no distant metastasis; M1, distant metastasis.

**Table 3. Change scores after 9 weeks of treatment**

|                                     | Mean change from baseline (V1) to 9 weeks (V4) |            |    |             |             |    | P-value | Interventional trend |
|-------------------------------------|------------------------------------------------|------------|----|-------------|-------------|----|---------|----------------------|
|                                     | Interventional arm                             |            |    | Control arm |             |    |         |                      |
|                                     | mean                                           | 95% CI     | N  | mean        | 95% CI      | N  |         |                      |
| <b>FACT-G total</b>                 | -2.4                                           | -9.22-4.50 | 18 | -3.9        | -11.29-3.45 | 14 | 0.955   | Beneficial           |
| <b>FACT-G physical well-being</b>   | -1.2                                           | -4.43-2.09 | 18 | -2.2        | -5.40-0.98  | 14 | 0.722   | Beneficial           |
| <b>FACT-G social well-being</b>     | -1.6                                           | -3.06-.09  | 18 | -0.3        | -2.20-1.71  | 14 | 0.193   | Adverse              |
| <b>FACT-G emotional well-being</b>  | 0.9                                            | -0.62-2.40 | 18 | -0.1        | -2.34-2.06  | 14 | 0.561   | Beneficial           |
| <b>FACT-G functional well-being</b> | -0.5                                           | -2.67-1.67 | 18 | -1.3        | -4.03-1.40  | 14 | 0.536   | Beneficial           |
| <b>HADS depression</b>              | 0.3                                            | -0.64-1.20 | 18 | 0.2         | -2.05-2.47  | 14 | 0.419   | Equivalent           |
| <b>HADS anxiety</b>                 | 0.3                                            | -1.65-2.23 | 18 | -0.8        | -2.99-1.41  | 14 | 0.710   | Adverse              |
| <b>BPI average pain</b>             | 0.6                                            | -0.34-1.50 | 19 | 0.2         | -0.54-0.96  | 14 | 0.788   | Adverse              |
| <b>BPI pain interference</b>        | 0.4                                            | -0.31-1.05 | 18 | 0.1         | -0.51-0.71  | 13 | 0.679   | Adverse              |
| <b>MDASI symptom severity</b>       | 0.7                                            | -0.08-1.39 | 18 | 0.2         | -0.38-0.82  | 14 | 0.442   | Adverse              |
| <b>MDASI symptom interference</b>   | 1.2                                            | 0.89-1.59  | 18 | 0.8         | -0.37-1.90  | 13 | 0.667   | Adverse              |

BPI, Brief Pain Inventory; CI, confidence interval; FACT-G, Functional Assessment for Cancer Therapy; HADS, Hospital Anxiety and Depression scale; MDASI, The M.D. Anderson Symptom Inventory; V, visit; N, number of evaluable patients in respective cluster.

**Table 4.** Univariate and multiple regression of FACT-G total score after nine weeks (V4) on parameters measured at baseline (V1) over all groups

| <b>Univariate regression</b> |                 |          |                         |
|------------------------------|-----------------|----------|-------------------------|
|                              | <i>P</i> -value | estimate | 95% CI                  |
| <b>Gender</b>                | 0.154           | 7.5      | -2.8 to 17.8            |
| <b>Age</b>                   | 0.228           | -0.2     | -0.5 to 0.1             |
| <b>ECOG PS</b>               | 0.509           | -3.2     | -12.7 to 6.3            |
| <b>Tumor stage</b>           | 0.284           | -1.8     | -5.1 to 1.5             |
| <b>Symptom severity</b>      | 0.0             | -6.6     | -10.5 to -2.7           |
| <b>Symptom interference</b>  | 0.011           | -3.4     | -6.0 to -0.8            |
| <b>Depression</b>            | 0.0             | -2.7     | -4.3 to -1.1            |
| <b>Anxiety</b>               | 0.034           | -1.4     | -2.7 to -0.1            |
| <b>Patient Satisfaction</b>  | 0.451           | 3.0      | -4.8 to 10.8            |
| <b>Anorexia/Cachexia</b>     | 0.143           | 0.8      | -0.3 to 1.9             |
| <b>Multiple regression</b>   |                 |          |                         |
|                              | <i>P</i> -value | estimate | 95% confidence interval |
| <b>Gender</b>                | 0.844           | 1.0      | -7.2 to 9.4             |
| <b>Age</b>                   | 0.103           | -0.3     | -0.6 to 0.1             |
| <b>ECOG PS</b>               | 0.746           | 1.5      | -6.1 to 9.1             |
| <b>Tumor stage</b>           | 0.586           | -0.8     | -3.4 to 1.7             |
| <b>Symptom severity</b>      | 0.079           | -4.4     | -8.3 to -0.2            |
| <b>Symptom interference</b>  | 0.744           | 0.5      | -1.8 to 2.8             |
| <b>Depression</b>            | 0.025           | -2.2     | -3.9 to -0.7            |
| <b>Anxiety</b>               | 0.869           | -0.1     | -1.5 to 1.3             |
| <b>Patient Satisfaction</b>  | 0.437           | -0.1     | -0.4 to 0.1             |
| <b>Anorexia/Cachexia</b>     | 0.161           | -0.9     | -2.0 to 0.2             |

CI, confidence interval; ECOG PS, Eastern Cooperative Oncology Group performance status.



Figure 1. CONSORT Flowchart

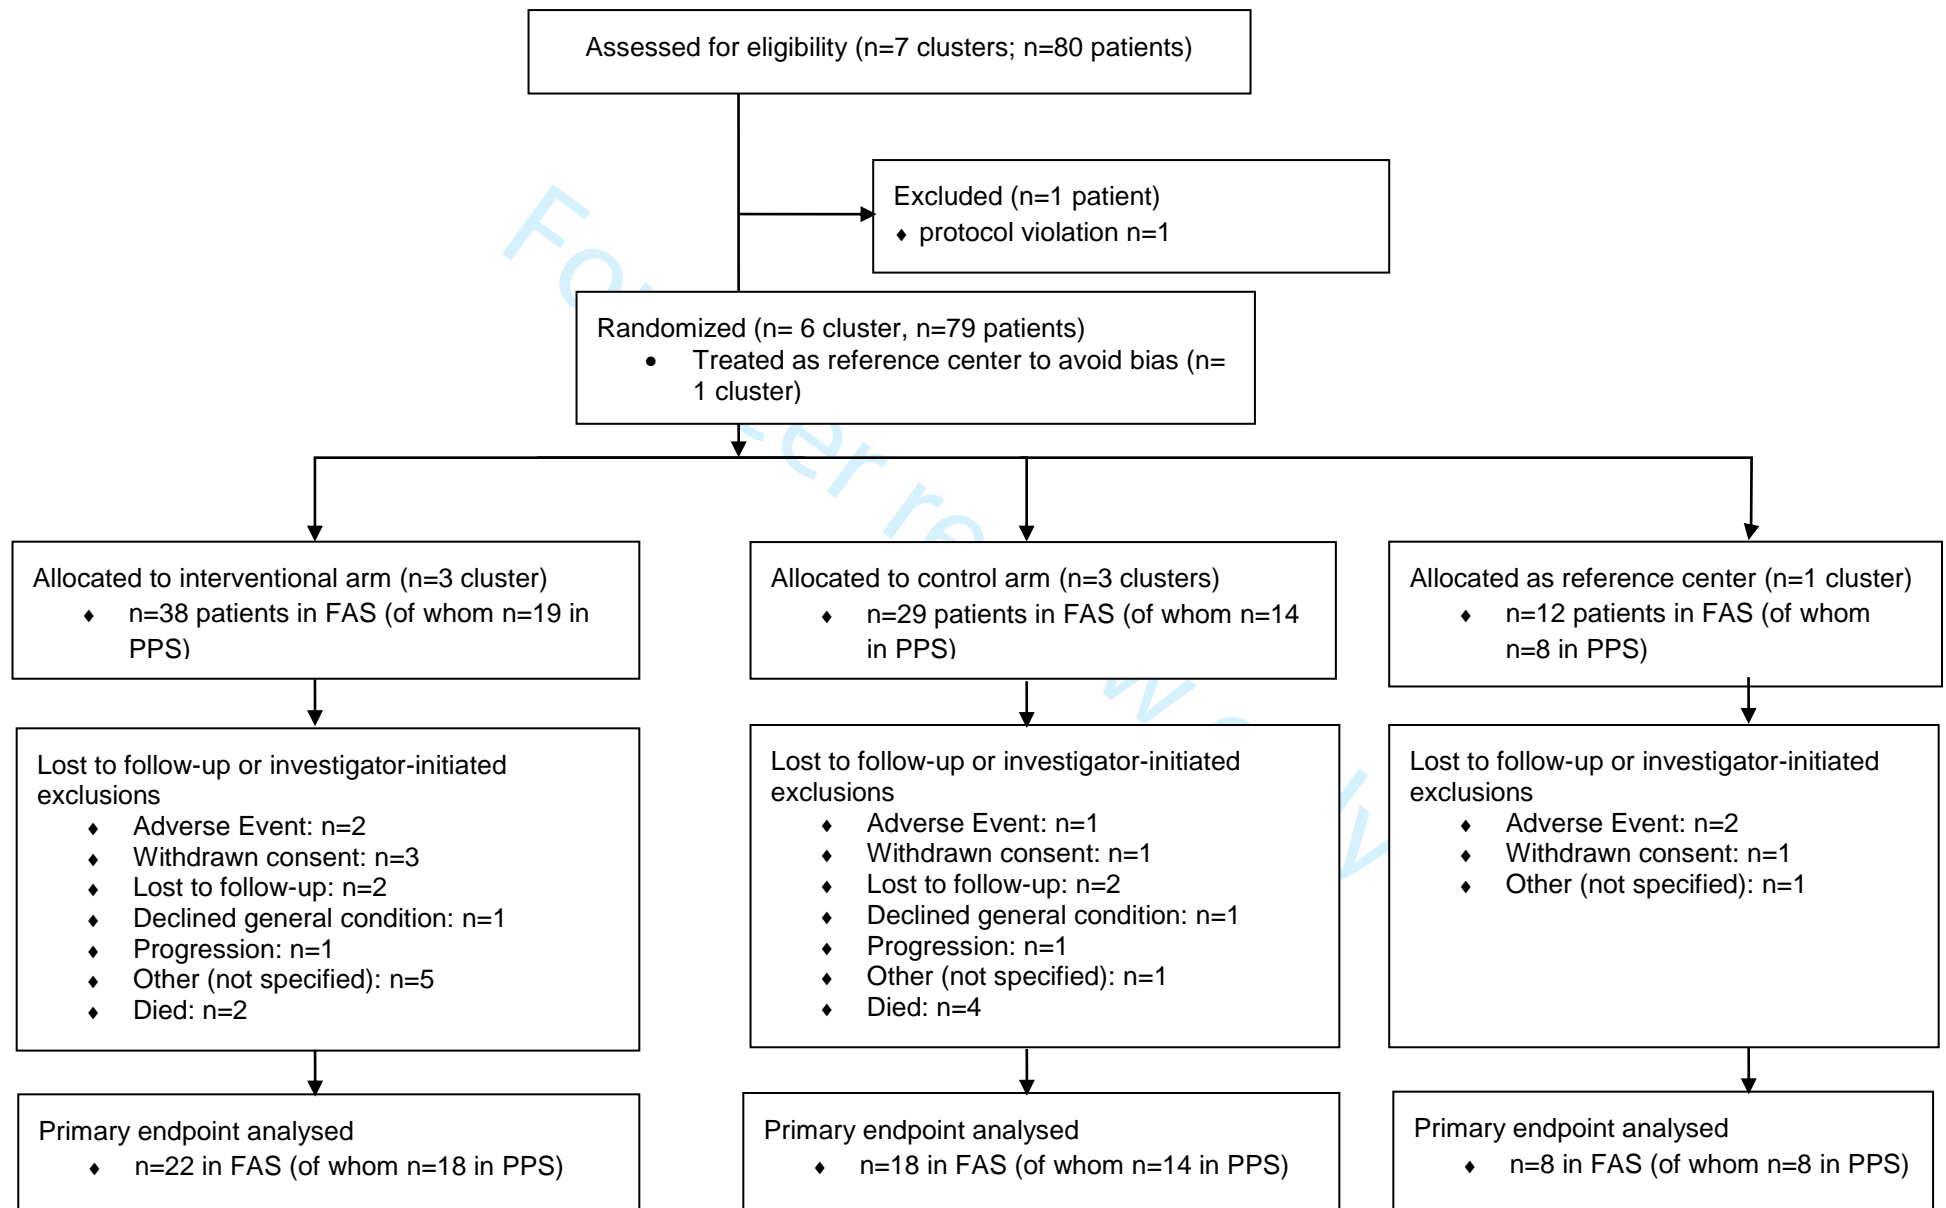

**Figure 2.** Absolute FACT-scores at baseline (V1), after nine weeks of treatment (V4; primary endpoint) and during follow up visit (V7)

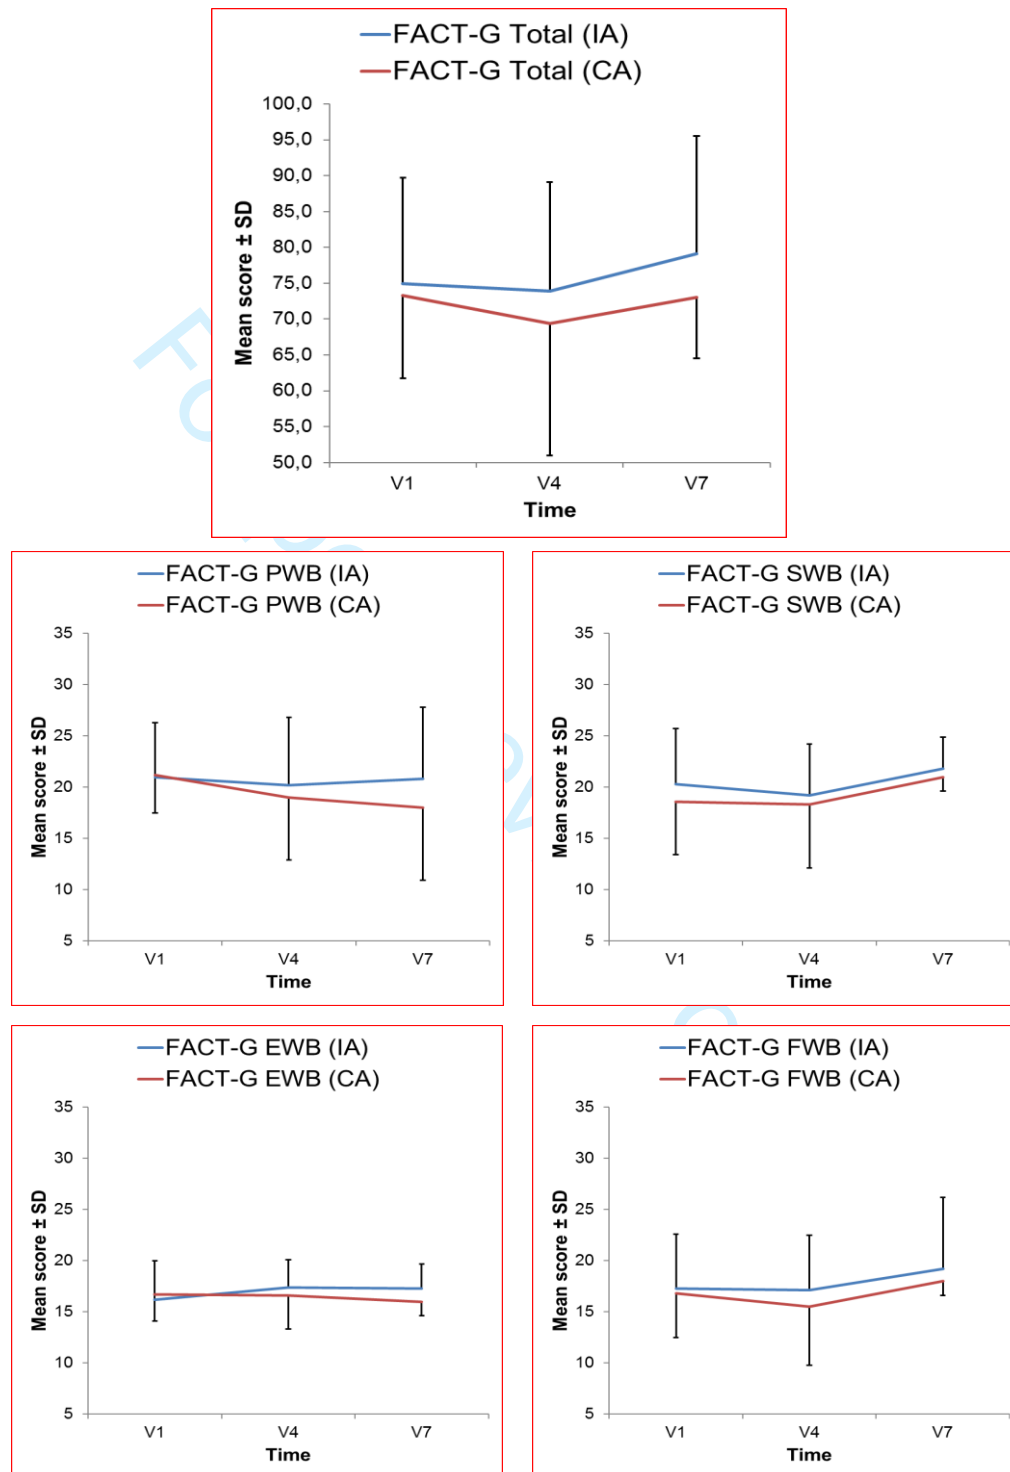

FACT-G, Functional Assessment for Cancer Therapy; EWB, emotional well-being; FWB, functional well-being; PWB, physical well-being; SD, standard deviation; SWB, social well-being; V, visit.

Number of evaluated patients for all FACT-G dimensions per visit and cohort: V1: IA N=19, CA N=14; V4: IA N=18, CA N=14; V7: IA N=9, CA N=2.

**Supplementary Table 1.** Absolute FACT-scores at each assessment time

| Questionnaire                     | Visit | Interventional arm (IA) |      |      | Control arm (CA) |      |      | <i>P</i> -value | Total |      | Effect size at V4<br>Cohen's d |
|-----------------------------------|-------|-------------------------|------|------|------------------|------|------|-----------------|-------|------|--------------------------------|
|                                   |       | N                       | Mean | SD   | N                | Mean | SD   |                 | Mean  | SD   |                                |
| <b>FACT-G total score</b>         | V1    | 19                      | 74.9 | 14.8 | 14               | 73.3 | 11.6 | 0.788           | 74.2  | 13.0 | 0,267                          |
|                                   | V2    | 18                      | 76.8 | 15.1 | 14               | 68.2 | 16.6 | 0.145           | 73.1  | 16.1 |                                |
|                                   | V3    | 18                      | 72.0 | 16.7 | 13               | 70.7 | 11.8 | 0.708           | 72.1  | 14.3 |                                |
|                                   | V4    | 18                      | 73.9 | 15.2 | 14               | 69.4 | 18.4 | 0.512           | 71.6  | 16.2 |                                |
|                                   | V5    | 13                      | 80.2 | 10.8 | 7                | 74.9 | 14.8 | 0.588           | 77.3  | 14.8 |                                |
|                                   | V6    | 14                      | 76.6 | 12.8 | 8                | 80.2 | 11.8 | 0.402           | 77.2  | 13.2 |                                |
|                                   | V7    | 9                       | 79.1 | 16.4 | 2                | 73.0 | 8.5  | 0.582           | 75.7  | 14.9 |                                |
| <b>FACT physical well-being</b>   | V1    | 19                      | 21.0 | 5.3  | 14               | 21.2 | 3.7  | 0.872           | 21.2  | 4.5  | 0,189                          |
|                                   | V2    | 18                      | 21.4 | 5.0  | 14               | 18.7 | 5.4  | 0.168           | 20.3  | 5.2  |                                |
|                                   | V3    | 18                      | 19.3 | 5.6  | 13               | 20.2 | 3.7  | 0.890           | 20.3  | 4.9  |                                |
|                                   | V4    | 18                      | 20.2 | 6.6  | 14               | 19.0 | 6.1  | 0.639           | 19.6  | 6.1  |                                |
|                                   | V5    | 14                      | 22.6 | 3.4  | 7                | 20.9 | 4.5  | 0.971           | 21.8  | 4.0  |                                |
|                                   | V6    | 14                      | 22.0 | 4.4  | 8                | 22.1 | 3.4  | 1.000           | 22.0  | 4.2  |                                |
|                                   | V7    | 9                       | 20.8 | 7.0  | 2                | 18.0 | 7.1  | 0.582           | 19.4  | 6.4  |                                |
| <b>FACT social well-being</b>     | V1    | 19                      | 20.3 | 5.4  | 14               | 18.6 | 5.2  | 0.304           | 19.8  | 5.2  | 0,161                          |
|                                   | V2    | 18                      | 20.5 | 4.6  | 14               | 17.7 | 6.0  | 0.251           | 19.6  | 5.2  |                                |
|                                   | V3    | 18                      | 19.5 | 4.6  | 13               | 17.9 | 4.6  | 0.395           | 19.2  | 4.5  |                                |
|                                   | V4    | 18                      | 19.2 | 5.0  | 14               | 18.3 | 6.2  | 0.896           | 19.3  | 5.3  |                                |
|                                   | V5    | 14                      | 20.9 | 3.9  | 7                | 20.4 | 5.1  | 0.913           | 20.5  | 4.5  |                                |
|                                   | V6    | 14                      | 20.7 | 2.7  | 8                | 22.2 | 3.2  | 0.188           | 21.2  | 3.2  |                                |
|                                   | V7    | 9                       | 21.8 | 3.1  | 2                | 21.0 | 1.4  | 0.727           | 21.3  | 3.8  |                                |
| <b>FACT emotional well-being</b>  | V1    | 19                      | 16.2 | 3.8  | 14               | 16.7 | 2.6  | 0.986           | 16.0  | 3.3  | 0,267                          |
|                                   | V2    | 18                      | 17.0 | 3.3  | 14               | 16.6 | 2.6  | 0.667           | 16.5  | 3.7  |                                |
|                                   | V3    | 18                      | 17.0 | 4.0  | 13               | 17.7 | 3.1  | 0.767           | 16.7  | 3.8  |                                |
|                                   | V4    | 18                      | 17.4 | 2.7  | 14               | 16.6 | 3.3  | 0.377           | 16.6  | 3.3  |                                |
|                                   | V5    | 13                      | 17.7 | 2.2  | 7                | 17.1 | 1.2  | 0.393           | 17.1  | 2.3  |                                |
|                                   | V6    | 14                      | 16.8 | 3.4  | 8                | 16.6 | 3.2  | 0.570           | 16.1  | 3.6  |                                |
|                                   | V7    | 9                       | 17.3 | 2.4  | 2                | 16.0 | 1.4  | 0.327           | 16.9  | 3.1  |                                |
| <b>FACT functional well-being</b> | V1    | 19                      | 17.3 | 5.3  | 14               | 16.8 | 4.3  | 0.900           | 17.2  | 4.5  | 0,288                          |
|                                   | V2    | 18                      | 17.9 | 5.4  | 14               | 15.1 | 5.9  | 0.319           | 16.7  | 5.4  |                                |
|                                   | V3    | 18                      | 16.1 | 6.4  | 13               | 14.9 | 4.5  | 0.679           | 16.0  | 5.4  |                                |
|                                   | V4    | 18                      | 17.1 | 5.4  | 14               | 15.5 | 5.7  | 0.512           | 16.2  | 5.4  |                                |
|                                   | V5    | 13                      | 18.8 | 4.6  | 7                | 16.4 | 5.3  | 0.485           | 17.9  | 4.5  |                                |
|                                   | V6    | 14                      | 17.1 | 6.1  | 8                | 19.3 | 3.8  | 0.441           | 17.9  | 5.4  |                                |
|                                   | V7    | 9                       | 19.2 | 7.0  | 2                | 18.0 | 1.4  | 0.909           | 18.0  | 6.0  |                                |

FACT-G, Functional Assessment for Cancer Therapy; SD, standard deviation; V, visit; N, number of patients

**Supplementary Table 2.** Absolute scores of secondary outcomes

| Questionnaire             | Visit | Interventional arm (IA) |      |      | Control arm (CA) |      |      | <i>P</i> -value | Total |      | Effect size at V4<br>Cohen's d |
|---------------------------|-------|-------------------------|------|------|------------------|------|------|-----------------|-------|------|--------------------------------|
|                           |       | N                       | Mean | SD   | N                | Mean | SD   |                 | Mean  | SD   |                                |
| <b>FAACT score</b>        |       |                         |      |      |                  |      |      |                 |       |      |                                |
|                           | V1    | 19                      | 37,9 | 4,3  | 14               | 39,1 | 5,4  | 0,439           | 38,3  | 4,8  |                                |
|                           | V2    | 18                      | 37,9 | 5,2  | 14               | 39,1 | 6,0  | 0,398           | 38,7  | 5,3  |                                |
|                           | V3    | 18                      | 37,4 | 5,5  | 13               | 37,9 | 5,2  | 0,828           | 38,1  | 5,0  |                                |
|                           | V4    | 18                      | 35,0 | 6,7  | 14               | 38,6 | 7,1  | 0,099           | 36,9  | 6,4  | -0,522                         |
|                           | V5    | 13                      | 39,3 | 4,5  | 7                | 37,3 | 8,9  | 0,877           | 37,7  | 6,2  |                                |
|                           | V6    | 14                      | 38,3 | 4,7  | 8                | 40,3 | 4,3  | 0,365           | 38,6  | 4,8  |                                |
|                           | V7    | 9                       | 33,0 | 11,8 | 2                | 34,0 | 14,1 | 1,000           | 33,2  | 10,0 |                                |
| <b>MDASI severity</b>     |       |                         |      |      |                  |      |      |                 |       |      |                                |
|                           | V1    | 19                      | 1,9  | 1,5  | 14               | 1,9  | 1,5  | 1,000           | 2,0   | 1,4  |                                |
|                           | V2    | 18                      | 2,0  | 1,5  | 14               | 2,5  | 1,6  | 0,464           | 2,2   | 1,6  |                                |
|                           | V3    | 18                      | 2,5  | 1,4  | 13               | 2,0  | 1,0  | 0,417           | 2,2   | 1,3  |                                |
|                           | V4    | 18                      | 2,4  | 1,6  | 14               | 2,1  | 1,6  | 0,561           | 2,2   | 1,6  | 0,188                          |
|                           | V5    | 13                      | 2,0  | 0,9  | 7                | 2,7  | 1,6  | 0,588           | 2,1   | 1,3  |                                |
|                           | V6    | 14                      | 2,1  | 1,2  | 8                | 2,4  | 1,7  | 0,868           | 2,2   | 1,5  |                                |
|                           | V7    | 9                       | 2,5  | 1,6  | 2                | 2,2  | 1,7  | 1,000           | 2,6   | 1,9  |                                |
| <b>MDASI interference</b> |       |                         |      |      |                  |      |      |                 |       |      |                                |
|                           | V1    | 19                      | 1,9  | 2,1  | 14               | 2,2  | 1,6  | 0,397           | 2,1   | 2,0  |                                |
|                           | V2    | 18                      | 2,2  | 2,0  | 14               | 3,4  | 1,9  | 0,065           | 2,6   | 2,0  |                                |
|                           | V3    | 18                      | 2,8  | 2,3  | 13               | 2,9  | 1,6  | 0,798           | 2,8   | 2,0  |                                |
|                           | V4    | 18                      | 3,0  | 2,1  | 14               | 2,9  | 2,2  | 0,837           | 2,9   | 2,2  | 0,047                          |
|                           | V5    | 13                      | 2,2  | 1,8  | 7                | 2,8  | 2,3  | 0,588           | 2,2   | 1,8  |                                |
|                           | V6    | 14                      | 2,3  | 1,7  | 8                | 2,9  | 1,9  | 0,570           | 2,4   | 1,8  |                                |
|                           | V7    | 9                       | 0,6  | 2,6  | 2                | 3,3  | 3,1  | 1,000           | 2,9   | 2,6  |                                |

FAACT, Functional Assessment of Anorexia/Cachexia Therapy questionnaire; MDASI, The M.D. Anderson Symptom Inventory; SD, standard deviation; V, visit; N, number of patients.

**Table 1: CONSORT 2010 checklist of information to include when reporting a cluster randomised trial**

| Section/Topic                    | Item No | Standard Checklist item                                                                                                                | Extension for cluster designs                                                                 | Page No *        |
|----------------------------------|---------|----------------------------------------------------------------------------------------------------------------------------------------|-----------------------------------------------------------------------------------------------|------------------|
| <b>Title and abstract</b>        |         |                                                                                                                                        |                                                                                               |                  |
|                                  | 1a      | Identification as a randomised trial in the title                                                                                      | Identification as a cluster randomised trial in the title                                     | Yes, p.1         |
|                                  | 1b      | Structured summary of trial design, methods, results, and conclusions (for specific guidance see CONSORT for abstracts) <sup>1,2</sup> | See table 2                                                                                   | Yes, p. 2-3      |
| <b>Introduction</b>              |         |                                                                                                                                        |                                                                                               |                  |
| <b>Background and objectives</b> | 2a      | Scientific background and explanation of rationale                                                                                     | Rationale for using a cluster design                                                          | Yes, 5-7 and p10 |
|                                  | 2b      | Specific objectives or hypotheses                                                                                                      | Whether objectives pertain to the the cluster level, the individual participant level or both | Yes, p.8-9       |
| <b>Methods</b>                   |         |                                                                                                                                        |                                                                                               |                  |
| <b>Trial design</b>              | 3a      | Description of trial design (such as parallel, factorial) including allocation ratio                                                   | Definition of cluster and description of how the design features apply to the clusters        | Yes, p.8         |
|                                  | 3b      | Important changes to methods after trial commencement (such as eligibility criteria), with reasons                                     |                                                                                               | Not applicable   |
| <b>Participants</b>              | 4a      | Eligibility criteria for participants                                                                                                  | Eligibility criteria for clusters                                                             | Yes, p.8         |
|                                  | 4b      | Settings and locations where the data were collected                                                                                   |                                                                                               | Yes, p.8         |
| <b>Interventions</b>             | 5       | The interventions for each group with sufficient details to allow replication, including how and when they were actually administered  | Whether interventions pertain to the cluster level, the individual participant level or both  | Yes, p.9         |

|                                         |     |                                                                                                                                                                                             |                                                                                                                                                                                                                    |                |
|-----------------------------------------|-----|---------------------------------------------------------------------------------------------------------------------------------------------------------------------------------------------|--------------------------------------------------------------------------------------------------------------------------------------------------------------------------------------------------------------------|----------------|
| <b>Outcomes</b>                         | 6a  | Completely defined pre-specified primary and secondary outcome measures, including how and when they were assessed                                                                          | Whether outcome measures pertain to the cluster level, the individual participant level or both                                                                                                                    | Yes, 10-12     |
|                                         | 6b  | Any changes to trial outcomes after the trial commenced, with reasons                                                                                                                       |                                                                                                                                                                                                                    | Not applicable |
| <b>Sample size</b>                      | 7a  | How sample size was determined                                                                                                                                                              | Method of calculation, number of clusters(s) (and whether equal or unequal cluster sizes are assumed), cluster size, a coefficient of intracluster correlation (ICC or $k$ ), and an indication of its uncertainty | Yes, 12-13     |
|                                         | 7b  | When applicable, explanation of any interim analyses and stopping guidelines                                                                                                                |                                                                                                                                                                                                                    | Not applicable |
| <b>Randomisation:</b>                   |     |                                                                                                                                                                                             |                                                                                                                                                                                                                    |                |
| <b>Sequence generation</b>              | 8a  | Method used to generate the random allocation sequence                                                                                                                                      |                                                                                                                                                                                                                    | Yes, p.10      |
|                                         | 8b  | Type of randomisation; details of any restriction (such as blocking and block size)                                                                                                         | Details of stratification or matching if used                                                                                                                                                                      | Yes, p.10      |
| <b>Allocation concealment mechanism</b> | 9   | Mechanism used to implement the random allocation sequence (such as sequentially numbered containers), describing any steps taken to conceal the sequence until interventions were assigned | Specification that allocation was based on clusters rather than individuals and whether allocation concealment (if any) was at the cluster level, the individual participant level or both                         | Yes, p. 10     |
| <b>Implementation</b>                   | 10  | Who generated the random allocation sequence, who enrolled participants, and who assigned participants to interventions                                                                     | Replace by 10a, 10b and 10c                                                                                                                                                                                        | Yes            |
|                                         | 10a |                                                                                                                                                                                             | Who generated the random allocation sequence, who                                                                                                                                                                  | Yes            |

|                            |     |                                                                                                                                                                     |                                                                                                                                                              |
|----------------------------|-----|---------------------------------------------------------------------------------------------------------------------------------------------------------------------|--------------------------------------------------------------------------------------------------------------------------------------------------------------|
|                            |     | enrolled clusters, and who assigned clusters to interventions                                                                                                       |                                                                                                                                                              |
|                            | 10b | Mechanism by which individual participants were included in clusters for the purposes of the trial (such as complete enumeration, random sampling)                  | Yes                                                                                                                                                          |
|                            | 10c | From whom consent was sought (representatives of the cluster, or individual cluster members, or both), and whether consent was sought before or after randomisation | Yes                                                                                                                                                          |
| <b>Blinding</b>            |     |                                                                                                                                                                     |                                                                                                                                                              |
|                            | 11a | If done, who was blinded after assignment to interventions (for example, participants, care providers, those assessing outcomes) and how                            | Not done                                                                                                                                                     |
|                            | 11b | If relevant, description of the similarity of interventions                                                                                                         | Not applicable                                                                                                                                               |
| <b>Statistical methods</b> |     |                                                                                                                                                                     |                                                                                                                                                              |
|                            | 12a | Statistical methods used to compare groups for primary and secondary outcomes                                                                                       | How clustering was taken into account<br>Yes, p.12                                                                                                           |
|                            | 12b | Methods for additional analyses, such as subgroup analyses and adjusted analyses                                                                                    | Yes, p.12                                                                                                                                                    |
| <b>Results</b>             |     |                                                                                                                                                                     |                                                                                                                                                              |
|                            | 13a | For each group, the numbers of participants who were randomly assigned, received intended treatment, and were analysed for the primary outcome                      | For each group, the numbers of clusters that were randomly assigned, received intended treatment, and were analysed for the primary outcome<br>Yes, figure 1 |
|                            | 13b | For each group, losses and exclusions after randomisation, together with reasons                                                                                    | For each group, losses and exclusions for both clusters and individual cluster members<br>Yes, figure 1                                                      |

|                                |     |                                                                                                                                                   |                                                                                                                                            |                |
|--------------------------------|-----|---------------------------------------------------------------------------------------------------------------------------------------------------|--------------------------------------------------------------------------------------------------------------------------------------------|----------------|
| <b>Recruitment</b>             | 14a | Dates defining the periods of recruitment and follow-up                                                                                           |                                                                                                                                            | Yes, p.9       |
|                                | 14b | Why the trial ended or was stopped                                                                                                                |                                                                                                                                            | Yes            |
| <b>Baseline data</b>           | 15  | A table showing baseline demographic and clinical characteristics for each group                                                                  | Baseline characteristics for the individual and cluster levels as applicable for each group                                                | Yes, table 2   |
| <b>Numbers analysed</b>        | 16  | For each group, number of participants (denominator) included in each analysis and whether the analysis was by original assigned groups           | For each group, number of clusters included in each analysis                                                                               | Yes            |
| <b>Outcomes and estimation</b> | 17a | For each primary and secondary outcome, results for each group, and the estimated effect size and its precision (such as 95% confidence interval) | Results at the individual or cluster level as applicable and a coefficient of intracluster correlation (ICC or k) for each primary outcome | Yes            |
|                                | 17b | For binary outcomes, presentation of both absolute and relative effect sizes is recommended                                                       |                                                                                                                                            | Yes            |
| <b>Ancillary analyses</b>      | 18  | Results of any other analyses performed, including subgroup analyses and adjusted analyses, distinguishing pre-specified from exploratory         |                                                                                                                                            | Yes            |
| <b>Harms</b>                   | 19  | All important harms or unintended effects in each group (for specific guidance see CONSORT for harms <sup>3</sup> )                               |                                                                                                                                            | Not applicable |
| <b>Discussion</b>              |     |                                                                                                                                                   |                                                                                                                                            |                |
| <b>Limitations</b>             | 20  | Trial limitations, addressing sources of potential bias, imprecision, and, if relevant, multiplicity of analyses                                  |                                                                                                                                            | Yes, p. 17-18  |
| <b>Generalisability</b>        | 21  | Generalisability (external validity, applicability) of the trial findings                                                                         | Generalisability to clusters and/or individual participants (as relevant)                                                                  | Yes            |



|                          |    |                                                                                                               |              |
|--------------------------|----|---------------------------------------------------------------------------------------------------------------|--------------|
| <b>Interpretation</b>    | 22 | Interpretation consistent with results, balancing benefits and harms, and considering other relevant evidence | Yes, p.16-17 |
| <b>Other information</b> |    |                                                                                                               |              |
| <b>Registration</b>      | 23 | Registration number and name of trial registry                                                                | Yes, p.3     |
| <b>Protocol</b>          | 24 | Where the full trial protocol can be accessed, if available                                                   | Yes, p.8     |
| <b>Funding</b>           | 25 | Sources of funding and other support (such as supply of drugs), role of funders                               | Yes, p.19    |

\* Note: page numbers optional depending on journal requirements

**Table 2: Extension of CONSORT for abstracts<sup>1,2</sup> to reports of cluster randomised trials**

| Item                      | Standard Checklist item                                                                                     | Extension for cluster trials                                                                                   |
|---------------------------|-------------------------------------------------------------------------------------------------------------|----------------------------------------------------------------------------------------------------------------|
| <b>Title</b>              | Identification of study as randomised                                                                       | <b>Identification of study as cluster randomised</b>                                                           |
| <b>Trial design</b>       | Description of the trial design (e.g. parallel, cluster, non-inferiority)                                   |                                                                                                                |
| <b>Methods</b>            |                                                                                                             |                                                                                                                |
| <b>Participants</b>       | Eligibility criteria for participants and the settings where the data were collected                        | <b>Eligibility criteria for clusters</b>                                                                       |
| <b>Interventions</b>      | Interventions intended for each group                                                                       |                                                                                                                |
| <b>Objective</b>          | Specific objective or hypothesis                                                                            | <b>Whether objective or hypothesis pertains to the cluster level, the individual participant level or both</b> |
| <b>Outcome</b>            | Clearly defined primary outcome for this report                                                             | <b>Whether the primary outcome pertains to the cluster level, the individual participant level or both</b>     |
| <b>Randomization</b>      | How participants were allocated to interventions                                                            | <b>How clusters were allocated to interventions</b>                                                            |
| <b>Blinding (masking)</b> | Whether or not participants, care givers, and those assessing the outcomes were blinded to group assignment |                                                                                                                |
| <b>Results</b>            |                                                                                                             |                                                                                                                |
| <b>Numbers randomized</b> | Number of participants randomized to each group                                                             | <b>Number of clusters randomized to each group</b>                                                             |
| <b>Recruitment</b>        | Trial status <sup>1</sup>                                                                                   |                                                                                                                |
| <b>Numbers analysed</b>   | Number of participants analysed in each group                                                               | <b>Number of clusters analysed in each group</b>                                                               |
| <b>Outcome</b>            | For the primary outcome, a result for each group and the estimated effect size and its precision            | <b>Results at the cluster or individual participant level as applicable for each primary outcome</b>           |
| <b>Harms</b>              | Important adverse events or side effects                                                                    |                                                                                                                |
| <b>Conclusions</b>        | General interpretation of the results                                                                       |                                                                                                                |
| <b>Trial registration</b> | Registration number and name of trial register                                                              |                                                                                                                |
| <b>Funding</b>            | Source of funding                                                                                           |                                                                                                                |

<sup>1</sup> Relevant to Conference Abstracts

## REFERENCES

---

- 1 Hopewell S, Clarke M, Moher D, Wager E, Middleton P, Altman DG, et al. CONSORT for reporting randomised trials in journal and conference abstracts. *Lancet* 2008, 371:281-283
- 2 Hopewell S, Clarke M, Moher D, Wager E, Middleton P, Altman DG at al (2008) CONSORT for reporting randomized controlled trials in journal and conference abstracts: explanation and elaboration. *PLoS Med* 5(1): e20
- 3 Ioannidis JP, Evans SJ, Gotzsche PC, O'Neill RT, Altman DG, Schulz K, Moher D. Better reporting of harms in randomized trials: an extension of the CONSORT statement. *Ann Intern Med* 2004; 141(10):781-788.

For peer review only

# BMJ Open

**Quality of life and added value of a tailored palliative care intervention in patients with soft tissue sarcoma undergoing treatment with trabectedin: A multicenter, cluster-randomized trial within the Germany Interdisciplinary Sarcoma Group (GISG)**

|                                 |                                                                                                                                                                                                                                                                                                                                                                                                                                                                                                                                                                                                                                                                                                                                                                                                                                                                                                                                                                                                                                                                                                                                                                                                                                                                                                                                                                                                                                                                                                                                                                                                                                                                                                                                                                |
|---------------------------------|----------------------------------------------------------------------------------------------------------------------------------------------------------------------------------------------------------------------------------------------------------------------------------------------------------------------------------------------------------------------------------------------------------------------------------------------------------------------------------------------------------------------------------------------------------------------------------------------------------------------------------------------------------------------------------------------------------------------------------------------------------------------------------------------------------------------------------------------------------------------------------------------------------------------------------------------------------------------------------------------------------------------------------------------------------------------------------------------------------------------------------------------------------------------------------------------------------------------------------------------------------------------------------------------------------------------------------------------------------------------------------------------------------------------------------------------------------------------------------------------------------------------------------------------------------------------------------------------------------------------------------------------------------------------------------------------------------------------------------------------------------------|
| Journal:                        | <i>BMJ Open</i>                                                                                                                                                                                                                                                                                                                                                                                                                                                                                                                                                                                                                                                                                                                                                                                                                                                                                                                                                                                                                                                                                                                                                                                                                                                                                                                                                                                                                                                                                                                                                                                                                                                                                                                                                |
| Manuscript ID                   | bmjopen-2019-035546.R2                                                                                                                                                                                                                                                                                                                                                                                                                                                                                                                                                                                                                                                                                                                                                                                                                                                                                                                                                                                                                                                                                                                                                                                                                                                                                                                                                                                                                                                                                                                                                                                                                                                                                                                                         |
| Article Type:                   | Original research                                                                                                                                                                                                                                                                                                                                                                                                                                                                                                                                                                                                                                                                                                                                                                                                                                                                                                                                                                                                                                                                                                                                                                                                                                                                                                                                                                                                                                                                                                                                                                                                                                                                                                                                              |
| Date Submitted by the Author:   | 27-May-2020                                                                                                                                                                                                                                                                                                                                                                                                                                                                                                                                                                                                                                                                                                                                                                                                                                                                                                                                                                                                                                                                                                                                                                                                                                                                                                                                                                                                                                                                                                                                                                                                                                                                                                                                                    |
| Complete List of Authors:       | Hentschel, Leopold; University Hospital Carl Gustav Carus, Department of Psychooncology of the University Cancer Center<br>Richter, Stephan; University Hospital Carl Gustav Carus, Department of Internal Medicine I<br>Kopp, Hans-Georg; Robert-Bosch-Center of Tumor Diseases, Interdisciplinary Center for Soft-Tissue-Sarcoma, GIST and Bone-Tumor<br>Kasper, Bernd; University Medical Center Mannheim, Medical Faculty Mannheim, University of Heidelberg, Sarcoma Unit, Interdisciplinary Tumor Center<br>Kunitz, Annegret; Vivantes Clinic Spandau, Internal Medicine<br>Grünwald, Viktor ; University Hospital Essen, Interdisciplinary Genitourinary Oncology/West-German Cancer Center<br>Kessler, Torsten; University Hospital of Münster, Hematology Oncology<br>Chemnitz, Jens Marcus; ev. Stift St. Martin, Internal Medicine<br>Pelzer, Uwe; Charité Medical University, Division of Hematology, Oncology and Tumor Immunology<br>Schuler, Ulrich; University Hospital Carl Gustav Carus, University Palliative Center<br>Freitag, Janet; University Hospital Carl Gustav Carus, Department of Internal Medicine I<br>Schilling, Andrea; University Hospital Carl Gustav Carus, Department of Social Work<br>Hornemann, Beate; University Hospital Carl Gustav Carus, Department of Psychooncology of the University Cancer Center<br>Arndt, Karin; Das Lebenshaus e.V, Patient Advocacy<br>Bornhaeuser, Martin; University Hospital Carl Gustav Carus, Department of Internal Medicine I; Deutsches Krebsforschungszentrum, National Center for Tumor Diseases (NCT)<br>Schuler, Markus Kajo; University Hospital Carl Gustav Carus, Department of Internal Medicine I; HELIOS Hospital Emil von Behring, Department of Internal Medicine II |
| <b>Primary Subject Heading</b>: | Palliative care                                                                                                                                                                                                                                                                                                                                                                                                                                                                                                                                                                                                                                                                                                                                                                                                                                                                                                                                                                                                                                                                                                                                                                                                                                                                                                                                                                                                                                                                                                                                                                                                                                                                                                                                                |
| Secondary Subject Heading:      | Patient-centred medicine                                                                                                                                                                                                                                                                                                                                                                                                                                                                                                                                                                                                                                                                                                                                                                                                                                                                                                                                                                                                                                                                                                                                                                                                                                                                                                                                                                                                                                                                                                                                                                                                                                                                                                                                       |

1  
2  
3  
4  
5  
6  
7  
8  
9  
10  
11  
12  
13  
14  
15  
16  
17  
18  
19  
20  
21  
22  
23  
24  
25  
26  
27  
28  
29  
30  
31  
32  
33  
34  
35  
36  
37  
38  
39  
40  
41  
42  
43  
44  
45  
46  
47  
48  
49  
50  
51  
52  
53  
54  
55  
56  
57  
58  
59  
60

|           |                                                                                                                  |
|-----------|------------------------------------------------------------------------------------------------------------------|
| Keywords: | Sarcoma < ONCOLOGY, Quality in health care < HEALTH SERVICES ADMINISTRATION & MANAGEMENT, Cancer pain < ONCOLOGY |
|           |                                                                                                                  |

SCHOLARONE™  
Manuscripts



I, the Submitting Author has the right to grant and does grant on behalf of all authors of the Work (as defined in the below author licence), an exclusive licence and/or a non-exclusive licence for contributions from authors who are: i) UK Crown employees; ii) where BMJ has agreed a CC-BY licence shall apply, and/or iii) in accordance with the terms applicable for US Federal Government officers or employees acting as part of their official duties; on a worldwide, perpetual, irrevocable, royalty-free basis to BMJ Publishing Group Ltd ("BMJ") its licensees and where the relevant Journal is co-owned by BMJ to the co-owners of the Journal, to publish the Work in this journal and any other BMJ products and to exploit all rights, as set out in our [licence](#).

The Submitting Author accepts and understands that any supply made under these terms is made by BMJ to the Submitting Author unless you are acting as an employee on behalf of your employer or a postgraduate student of an affiliated institution which is paying any applicable article publishing charge ("APC") for Open Access articles. Where the Submitting Author wishes to make the Work available on an Open Access basis (and intends to pay the relevant APC), the terms of reuse of such Open Access shall be governed by a Creative Commons licence – details of these licences and which [Creative Commons](#) licence will apply to this Work are set out in our licence referred to above.

Other than as permitted in any relevant BMJ Author's Self Archiving Policies, I confirm this Work has not been accepted for publication elsewhere, is not being considered for publication elsewhere and does not duplicate material already published. I confirm all authors consent to publication of this Work and authorise the granting of this licence.

## Original Research

**Quality of life and added value of a tailored palliative care intervention in patients with soft tissue sarcoma undergoing treatment with trabectedin: A multicenter, cluster-randomized trial within the Germany Interdisciplinary Sarcoma Group (GISG)**

Leopold Hentschel<sup>a</sup>, Stephan Richter<sup>b</sup>, Hans-Georg Kopp<sup>c</sup>, Bernd Kasper<sup>d</sup>, Annegret Kunitz<sup>e</sup>, Viktor Grünwald<sup>f</sup>, Torsten Kessler<sup>g</sup>, Jens Marcus Chemnitz<sup>h</sup>, Uwe Pelzer<sup>i</sup>, Ulrich Schuler<sup>j</sup>, Janet Freitag<sup>b</sup>, Andrea Schilling<sup>k</sup>, Beate Hornemann<sup>a</sup>, Karin Arndt<sup>l</sup>, Martin Bornhäuser<sup>b,m</sup>, Markus Kajo Schuler<sup>b,n</sup>

## Author affiliations

- <sup>a</sup> Department of Psychooncology of the University Cancer Center, University Hospital Carl Gustav Carus, Dresden, Germany
- <sup>b</sup> Department of Internal Medicine I, University Hospital Carl Gustav Carus, TU Dresden, Dresden, Germany
- <sup>c</sup> Interdisciplinary Center for Soft-Tissue-Sarcoma, GIST and Bone-Tumor, Robert-Bosch-Center of Tumor Diseases, Stuttgart, Germany
- <sup>d</sup> Sarcoma Unit, Interdisciplinary Tumor Center, University Medical Center, University of Heidelberg, Mannheim, Germany
- <sup>e</sup> Internal Medicine, Vivantes Clinic Spandau, Berlin, Germany
- <sup>f</sup> Interdisciplinary Genitourinary Oncology/West-German Cancer Center, University Hospital Essen, Essen, Germany
- <sup>g</sup> Hematology Oncology, University Hospital of Münster, Münster, Germany
- <sup>h</sup> Internal Medicine, Ev. Stift St. Martin, Koblenz, Germany
- <sup>i</sup> Division of Hematology, Oncology and Tumor Immunology, Charité Medical University, Berlin, Germany
- <sup>j</sup> University Palliative Center, University Hospital Carl Gustav Carus, Dresden, Germany
- <sup>k</sup> Department of Social Work, University Hospital Carl Gustav Carus, Dresden, Germany
- <sup>l</sup> Patient Advocacy „Das Lebenshaus e.V.“, Wölfersheim, Germany
- <sup>m</sup> National Center for Tumor Diseases (NCT), Deutsches Krebsforschungszentrum, Heidelberg, Germany
- <sup>n</sup> Department of Internal Medicine II, Helios Hospital Emil von Behring, Berlin, Germany

**Correspondence to:**

**Mr. Leopold Hentschel, Dipl. Psych.**

University Cancer Center, University Hospital Carl Gustav Carus, Fetscherstraße 74, 01307 Dresden, Germany

Phone: +49-351-458-7120

E-mail: [Leopold.Hentschel@uniklinikum-dresden.de](mailto:Leopold.Hentschel@uniklinikum-dresden.de)

## ABSTRACT

**Objectives:** The choice of drug treatment in advanced soft tissue sarcoma (STS) continues to be a challenge regarding efficacy, quality of life (QoL) and toxicity. Unlike other cancer types, where integrating patient-reported outcomes (PRO) has proven to be beneficial for QoL, there is no such evidence in patients with STS as of now. The YonLife trial aimed to explore the effect of a tailored multi-step intervention on QoL, symptoms and survival in patients with advanced STS undergoing treatment with trabectedin as well as identifying predictors of QoL.

**Design:** YonLife is a cluster-randomized, open-label, proof-of-concept study. The intervention incorporates electronic PRO-assessment, a case-vignette and expert-consented treatment recommendations.

**Participants:** Six hospitals were randomized to the control arm (CA) or interventional arm (IA). Seventy-nine patients were included of whom 40 were analyzed as per-protocol set.

**Primary and secondary outcome measures:** The primary endpoint was the change of FACT-G total score after nine weeks. Secondary outcomes included QoL (FACT-G subscales), anorexia and cachexia (FAACT), symptoms (MDASI), anxiety and depression (HADS), pain intensity and interference (BPI), and survival assessment.

**Results:** After nine weeks of treatment QoL declined less in the IA ( $\Delta$  FACT-G total score: -2.4, 95% CI: -9.2 to 4.5) as compared to CA ( $\Delta$  FACT-G total score: -3.9; 95% CI: -11.3 to 3.5;  $P=0.765$ ). A beneficial trend of the patient-tailored evaluation in IA was observed in almost all FACT-G subscales. Smaller adverse trends between arms were



1  
2  
3 observed for MDASI, FAACT, HADS and BPI scales. These trends failed to reach  
4  
5 statistical significance. Overall mean survival was longer in IA (648 days) than in CA  
6  
7 (389 days,  $P=0.110$ ). QoL was predicted by symptom severity, symptom interference,  
8  
9 depression and anxiety.  
10

11  
12 **Conclusion:** Our data indicate a potentially beneficial effect of an ePRO-based  
13  
14 intervention on QoL that needs to be reappraised in confirmatory studies.  
15

16  
17 **Trial registration:** ClinicalTrials.gov Identifier: NCT02204111.  
18  
19  
20  
21  
22  
23  
24  
25  
26  
27  
28  
29  
30  
31  
32  
33  
34  
35  
36  
37  
38  
39  
40  
41  
42  
43  
44  
45  
46  
47  
48  
49  
50  
51  
52  
53  
54  
55  
56  
57  
58  
59  
60

## STRENGTHS AND LIMITATIONS OF THIS STUDY

- YonLife explores the value and efficacy of a patient-directed intervention on quality of life (QoL) in sarcoma patients
- YonLife captures patient-reported outcomes (PRO) electronically and provides a tailored expert-derived intervention in a multi-center setting
- Effect sizes are now available for conducting confirmatory trials to examine the YonLife results

## KEYWORDS

Sarcoma, quality of life, patient-reported outcomes, trabectedin

## INTRODUCTION

The armamentarium of systemic treatment in advanced soft tissue sarcoma (STS) has evolved over the past decade. Yet, the burden of disease remains high and drug related adverse events are frequent<sup>1-3</sup>, even in patients who experience long lasting clinical benefit. Overall, quality of life (QoL) in sarcoma-patients is more impaired than in the general population<sup>2, 4</sup>, but comparable to patients with more frequent cancer diseases.<sup>5</sup> Mental health problems such as distress, depression and anxiety are as frequent as in other cancer patients.<sup>6, 7</sup>

Treatment algorithms for STS beyond first-line treatment do not show superiority between one regimen and another.<sup>8</sup> On the other hand, there are distinct and drug-specific side effects. Therefore, the choice of which regimen should be applied becomes a matter of debate within the patient-doctor consultation with considerations comprising preferences and personal beliefs.<sup>9</sup> Consequently, it is important to assess the treatment effectiveness in two ways. First, in terms of tumor burden as an outcome (e.g., progression-free survival or overall survival), and, secondly, in terms of symptoms and toxicities as assessed by patient-reported outcomes (PRO). As an individual might experience improvement in symptoms while a treatment is not superior on a group-level, appropriate strategies to evaluate the individual patient benefit need to be applied. Especially, if there is no superiority in survival, further outcomes should be considered, such as evaluation of minimal clinical important difference or the time to deterioration of QoL.<sup>10</sup>

Trabectedin (Yondelis<sup>®</sup>) is a semi-synthetic drug originally isolated from the sea squirt *Ecteinascidia turbinata* with a complex multimodal mechanism of action.<sup>11, 12</sup>

1  
2  
3 Trabectedin was the first marine-derived antineoplastic drug approved in 2007 in the  
4  
5 European Union and in over 70 countries across the globe for the treatment of patients  
6  
7 with advanced STS after failure of anthracyclines and ifosfamide, or who are unsuited to  
8  
9 receive these agents.<sup>13</sup> In 2015, trabectedin was also approved in the United States  
10  
11 based on a pivotal phase III trial, which demonstrated that trabectedin had a significantly  
12  
13 longer PFS compared with dacarbazine in patients with advanced liposarcoma or  
14  
15 leiomyosarcoma after failure of prior chemotherapy.<sup>14</sup> Noteworthy, an *ad hoc* analysis of  
16  
17 the phase III trial, which compared inpatient with outpatient infusion of trabectedin,  
18  
19 showed that safety, efficacy and PROs outcomes were comparable between both  
20  
21 treatment settings.<sup>15</sup> In addition, an analysis of the MD Anderson Symptom Inventory  
22  
23 (MDASI) PRO scores reported no clinically meaningful differences among patients  
24  
25 reporting severe symptoms (MDASI score  $\geq 7$ ) who were treated with trabectedin in  
26  
27 either an inpatient or outpatient treatment settings.<sup>15</sup>  
28  
29  
30  
31  
32

33 Assessment and interventions based on PRO have been proven to yield  
34  
35 beneficial outcomes in various settings and entities.<sup>16-21</sup> For instance, Basch *et al* found  
36  
37 benefits of their STAR (Symptom Tracking and Reporting) intervention in prolonging  
38  
39 time on chemotherapy, less unexpected admission and longer quality-adjusted survival.  
40  
41  
42 <sup>17</sup> In brief, they randomized 766 patients from a single institution under chemotherapy for  
43  
44 solid tumors to either usual care or STAR. The intervention consisted of 12 different  
45  
46 symptoms collected remotely, providing treating physicians with graphical  
47  
48 representations of results and alerting nurses when a preset cut-off of worsening  
49  
50 condition was met. Another randomized multi-center trial evaluated the effect of a web-  
51  
52 based, self-report assessment and educational intervention on symptom distress during  
53  
54  
55  
56  
57  
58  
59  
60

1  
2  
3 cancer therapy in 752 ambulatory patients from different entities and with various  
4 diagnoses.<sup>18</sup> In this multicenter sample of participants they reported that Web-based  
5 patients-rated symptoms and communication coaching reduced symptom distress after  
6 active cancer treatment, particularly in those aged >50 years. Nevertheless, PRO  
7 assessment in patients treated for STS struggle with serious barriers such as a relatively  
8 small patient population and the fact that no STS-specific QoL- or symptom-  
9 questionnaires are available.<sup>4, 22</sup> Considering that merely assessing PRO might not be  
10 beneficial<sup>23</sup>, we believe it should be accompanied by additional interventions such as  
11 nurse-led patient education, self-care support or a multi-professional expert panel that  
12 discusses PRO-results and derive treatment recommendations.<sup>24</sup> Despite the increasing  
13 knowledge on benefits and assessment of PRO in general and the high symptom-  
14 burden of patients suffering from advanced STS, the proof of concept for such  
15 interventions remains open. Therefore, the cluster-randomized YonLife study was  
16 designed to evaluate the value and efficacy of a tailored, patient-directed palliative  
17 intervention based on various domains of QoL and to explore effect sizes using different  
18 PRO instruments in patients with advanced STS undergoing treatment with trabectedin.  
19  
20  
21  
22  
23  
24  
25  
26  
27  
28  
29  
30  
31  
32  
33  
34  
35  
36  
37  
38  
39  
40  
41  
42  
43  
44  
45  
46  
47  
48  
49  
50  
51  
52  
53  
54  
55  
56  
57  
58  
59  
60

## METHODS

### Patients

Adult patients ( $\geq 18$  years) suffering from advanced or metastatic STS who had received at least one dose of trabectedin  $1.5 \text{ mg/m}^2$ , given as a 24-hour intravenous infusion every three weeks, were included in this study. Physician-assessed life expectancy of patients had to be at least six months and Eastern Cooperative Oncology Group (ECOG)-performance status score had to be  $\leq 2$ . All study procedures were conducted in accordance with the ethical standards as laid down in the 1964 Declaration of Helsinki and its later amendments. The YonLife trial was approved by the Ethics Committee of the University Hospital Carl Gustav Carus in Dresden on June 2014 (EK241062014), and all participating centers obtained the approval of the local ethics committee before patient enrolment. All patients provided written informed consent before inclusion in the study.

### Patient and public involvement

We are grateful to all patients that participated in the YonLife trial. A member of the national sarcoma patient advocacy group “Das Lebenhaus” took part in the expert panel discussion.

### Trial design and objectives

Full details of YonLife trial (ClinicalTrials.gov Identifier: NCT02204111) have been reported.<sup>25</sup> Briefly, the YonLife trial was designed as a cluster-randomized, explorative, open-label, non-blinded, proof-of-concept study with the aim to compare the overall

1  
2  
3 QoL between patients with STS receiving a multidimensional intervention, on the  
4 basis of patients' individual PROs, and those patients receiving usual supportive  
5 treatment. Outcomes were assessed at baseline (i.e. visit [V] 1) and after 3 weeks (V2),  
6 6 (V3) and 9 (V4) weeks. Follow-up was conducted 21 (V5), 35 (V6) and 61 (V7) weeks  
7 after baseline. Primary objective was the explorative comparison of QoL-change after  
8 nine weeks (V4) between interventional arm and control arm. Secondary objectives  
9 included explorative comparison between other PRO such as anxiety, depression, pain  
10 as well as survival. Furthermore, factors that predict QoL after nine weeks were  
11 explored.  
12  
13  
14  
15  
16  
17  
18  
19  
20  
21  
22  
23  
24  
25

## 26 **Intervention**

27  
28 Patients in the control arm (CA) received only electronic PRO-assessment without  
29 feedback to the treatment team. Patients treated in the interventional arm (IA) received  
30 a comprehensive four-step evaluation comprising: 1) PRO were assessed electronically  
31 via handheld tablet-PCs at each visit; 2) a case vignette was created based on the  
32 obtained PRO and clinical data at baseline; 3) supportive care recommendations were  
33 consented during discussion on patients' vignettes in a multi-professional expert panel;  
34 and 4) these treatment-suggestions as well as graphical representation of obtained PRO  
35 were provided to the treating physicians prior to V2 in the interventional center.  
36  
37 Clinicians in the IA had the opportunity to discuss the graphical presentation with their  
38 patients and initiate the treatment suggestions. The expert panel consisted of experts in  
39 the field of oncology, palliative care, social work, nursing, psycho-oncology as well as a  
40 patient advocate.  
41  
42  
43  
44  
45  
46  
47  
48  
49  
50  
51  
52  
53  
54  
55  
56  
57  
58  
59  
60

## Randomization

Six German centers were cluster-randomized in a 1:1 ratio in an IA (3 centers) and a CA (3 centers). This trial was designed as a cluster-randomized trials to avoid contamination that might result in a type 2 error. If randomized on patient level, contamination might have been occurred as patients talked to each other about the recommendations or the treating physician transferred recommendations from one patient to another. Randomization was conducted by a colleague not actively involved in this trial using random numbers generated in excel.

The seventh center where the supportive care recommendations were created served as a reference center (RC). Patients treated at the RC received the same intervention as in the IA but were analyzed separately. The RC was invented in order to avoid bias from a dual role of participating clinicians as being part of treatment staff in the center and taking part in the expert panel at the same time. Furthermore, we initiated the RC at first center in order to get to know and solve any technical or logistical barriers in a mono-center setting before spreading it to a multi-center setting.

## Outcome measures

The primary outcome explored the changes of patients QoL in IA and CA after nine weeks of treatment as measured with the Functional Assessment for Cancer Therapy (FACT-G) total score. Nine weeks was set as time for primary outcome assessment since this period provides enough time to take action concerning interventional proposals. The FACT-G is a PRO measure used to assess health-related QoL in



patients undergoing cancer therapy as a total sum score (ranging from 0 to 108) comprising four subscales of QoL (physical, social, emotional, functional well-being).<sup>26</sup> Furthermore, we evaluated the number of patients with a clinical improvement between V1 and V4. This equals a change in the FACT-G total score of at least 3.3 points in order to represent a minimal clinically important difference (MCID). Additionally, the time until QoL deterioration (TUD) was also assessed as a change of at least 3.3 points between V1 and V4 as defined by King *et al.*<sup>27</sup> Analyses of long-term effects included the data collected from V1 until the end of the study at week 67 (V7). Visit schedule and outcomes of all secondary endpoints measured throughout the study are depicted in Table 1.

**Table 1: Visit schedule and outcomes**

| Study period                                                 | SCR | Intervention phase |   |   | Follow up phase |    |    |
|--------------------------------------------------------------|-----|--------------------|---|---|-----------------|----|----|
| Visit                                                        | 1   | 2                  | 3 | 4 | 5               | 6  | 7  |
| Week (+/- 3 days)                                            | 0   | 3                  | 6 | 9 |                 |    |    |
| Week (+/- 1 week)                                            |     |                    |   |   | 21              | 35 | 61 |
| Concomitant medication                                       | x   | x                  | x | x | x               | x  | x  |
| FACT-G                                                       | x   | x                  | x | x | x               | x  | x  |
| MDASI                                                        | x   | x                  | x | x | x               | x  | x  |
| FAACT                                                        | x   |                    |   | x | x               | x  | x  |
| BPI                                                          | x   |                    |   | x | x               | x  | x  |
| IN-PATSAT32*                                                 | x   |                    |   | x | x               | x  | x  |
| HADS                                                         | x   |                    |   | x | x               | x  | x  |
| Tumor-specific & socio-demographic parameters                | x   |                    |   | x | x               | x  | x  |
| Feasibility Scoring based on patients' and doctors' opinion* |     |                    |   | x |                 |    |    |

\* Data is currently being analyzed and is available upon request.

Secondary outcomes included the subscales of the FACT-G questionnaire: physical (range: 0-28), emotional (range: 0-24), functional (range: 0-28), and social well-being (range: 0-28) explored at V4 and during follow up (i.e. V7).<sup>24</sup> Moreover, the effect size of the intervention was measured as COHEN'S *d* test by measuring the difference between

1  
2  
3 two means.<sup>28</sup> The M.D. Anderson Symptom Inventory (MDASI) was used to measure  
4 the severity of 13 cancer-related symptoms and their impact on six dimensions of daily  
5 life.<sup>29</sup> Psychological distress was evaluated by the Hospital Anxiety and Depression  
6 scale (HADS).<sup>30</sup> It provided a total sum score (range: 0-42) and two self-rating subscales  
7 for anxiety and depression (range: 0-21). HADS also identified clinically relevant cases  
8 of anxiety and depression using pre-determined cut-off scores.<sup>31</sup> The Functional  
9 Assessment of Anorexia/Cachexia Therapy questionnaire (FAACT) measured the  
10 impact of cachexia and anorexia on patients' QoL.<sup>32</sup> Finally, the Brief Pain Inventory  
11 (BPI) in a scale range from 0-10 measured the intensity of pain and pain-related  
12 interference. <sup>33</sup> We assessed the predictive value of the following variables at V1 for  
13 QoL: gender, age, performance status (ECOG), tumor stage (UICC-classification),  
14 symptom severity (MDASI), symptom interference (MDASI), depression (HADS), anxiety  
15 (HADS), patients satisfaction (IN-PATSAT32)<sup>34</sup>, anorexia/cachexia (FAACT).  
16  
17  
18  
19  
20  
21  
22  
23  
24  
25  
26  
27  
28  
29  
30  
31  
32  
33  
34

### 35 **Statistical considerations**

36  
37 The patients sample size was calculated for an explorative purpose. We assumed the  
38 superiority of our intervention concerning FACT-G total score. Type I error was set to  
39  $\alpha=0.05$  (one-sided), with a statistical power of  $1-\beta=0.80$  and a medium effect<sup>27</sup> between  
40 the groups in FACT-G=15, with an estimated standard deviation (SD) of  $\sigma=17$  and a  
41 conservatively estimated intra-cluster-correlation coefficient of  $P=0.1$ .<sup>35</sup> This calculation  
42 resulted in a cluster size of 11 patients. Additionally, 11 patients were recruited in the  
43 reference center, for a total of 77 patients.  
44  
45  
46  
47  
48  
49  
50  
51  
52

53 The Full Analysis Set (FAS) comprised all patients included in the study and  
54  
55

1  
2  
3 allocated to a treatment group irrespective of their compliance with the planned course  
4 of treatment (intention-to-treat principle). Analyses of efficacy endpoints were performed  
5 on the per-protocol analysis set (PPS) defined as the subset of patients of the FAS who  
6 have provided complete data at the first (V1) and last visit (V4) and who had no major  
7 protocol deviations.  
8  
9

10  
11  
12  
13  
14 Survival was assessed as means of PFS and overall survival (OS). The PFS and  
15 OS analyses were defined as the time interval from the first administration of trabectedin  
16 to the earliest date of disease progression or death, regardless of cause (whichever  
17 occurred first) for PFS, whereas OS was defined as the time between the start of  
18 trabectedin and patient death from any cause. Patients were censored after the  
19 discontinuation of their study participation. Means of PFS and OS are reported to  
20 provide the ability to describe and compare the arms, as median value of OS is not  
21 defined for confidence interval (CI) within the observation period of this study. Mann-  
22 Whitney-U, Fisher-exact test, and Chi-squared test were used for the detection of  
23 possible differences concerning demographics. T-test was applied to detect possible  
24 differences between metric outcomes, whereas linear univariate and multivariate  
25 regression were calculated to identify determinants of QoL at V4.  
26  
27  
28  
29  
30  
31  
32  
33  
34  
35  
36  
37  
38  
39  
40  
41  
42  
43  
44  
45  
46  
47  
48  
49  
50  
51  
52  
53  
54  
55  
56  
57  
58  
59  
60

## RESULTS

### Patients and treatment arms

Between September 2014 and March 2018, 80 patients from seven sites were screened for study participation (figure 1). The FAS encompasses 79 patients, as one patient had to be excluded from analysis due to protocol violation. In the FAS, mean age was 58 years (range: 22-86). Leiomyosarcoma ( $n=32$ ) and liposarcoma ( $n=23$ ) were the most prevalent histological type of sarcomas. At baseline, the IA included 38 patients (19 of whom included in PPS), while CA consists of 29 patients (14 of whom included in PPS). No difference concerning age, gender and the number of previous cycles of trabectedin was observed between the arms. In the CA more patients had a higher tumor stage ( $P=0.083$ ) and less patients suffer from leiomyosarcoma (Table 2).

**Table 2. Patient characteristic at baseline**

|                                | Interventional arm (IA; 3 centers)<br><i>N</i> =38 | Control arm (CA; 3 centers)<br><i>N</i> =29 | Reference Center (RF; 1 center)<br><i>N</i> =12 | Full Analysis Set<br><i>N</i> =79 |
|--------------------------------|----------------------------------------------------|---------------------------------------------|-------------------------------------------------|-----------------------------------|
| <b>Full Analysis Set (FAS)</b> |                                                    |                                             |                                                 |                                   |
| <b>Gender</b>                  |                                                    |                                             |                                                 |                                   |
| Male                           | 20                                                 | 15                                          | 6                                               | 41                                |
| Female                         | 18                                                 | 14                                          | 6                                               | 38                                |
| <b>Age</b>                     |                                                    |                                             |                                                 |                                   |
| Mean (SD)                      | 58 (12)                                            | 56 (15)                                     | 63 (16)                                         | 58 (14)                           |
| Range (years)                  | 38-87                                              | 22-80                                       | 34-82                                           | 22-87                             |
| <b>Tumor histology</b>         |                                                    |                                             |                                                 |                                   |
| Leiomyosarcoma                 | 19                                                 | 5                                           | 5                                               | 29                                |
| Liposarcoma                    | 6                                                  | 11                                          | 3                                               | 20                                |
| Others*                        | 13                                                 | 12                                          | 4                                               | 29                                |
| missing                        | 0                                                  | 1                                           | 0                                               | 1                                 |
| <b>Metastatic disease</b>      |                                                    |                                             |                                                 |                                   |
| M0                             | 16                                                 | 11                                          | 5                                               | 32                                |
| M1                             | 12                                                 | 16                                          | 7                                               | 35                                |
| missing                        | 10                                                 | 2                                           | 0                                               | 12                                |
| <b>ECOG PS</b>                 |                                                    |                                             |                                                 |                                   |
| 0                              | 20                                                 | 14                                          | 5                                               | 39                                |
| 1                              | 15                                                 | 13                                          | 7                                               | 35                                |
| 2                              | 3                                                  | 0                                           | 0                                               | 3                                 |

|                                                          |                                                     |                                              |                                                 |                                  |
|----------------------------------------------------------|-----------------------------------------------------|----------------------------------------------|-------------------------------------------------|----------------------------------|
| <b>Missing</b>                                           | 0                                                   | 2                                            | 0                                               | 2                                |
| <b>Number of previous cycles of trabectedin</b>          |                                                     |                                              |                                                 |                                  |
| <b>Median</b>                                            | 0                                                   | 1                                            | 1                                               | 1                                |
| <b>Range</b>                                             | 0-15                                                | 0-17                                         | 0-11                                            | 0-17                             |
| <b>Number of previous cycles of another chemotherapy</b> |                                                     |                                              |                                                 |                                  |
| <b>Median</b>                                            | 1.5                                                 | 1                                            | 2                                               | 2                                |
| <b>Range</b>                                             | 0-6                                                 | 0-5                                          | 1-4                                             | 0-6                              |
| <b>Number of previous lines of another chemotherapy</b>  |                                                     |                                              |                                                 |                                  |
| <b>Median</b>                                            | 2.5                                                 | 2.5                                          | 3                                               | 2                                |
| <b>Range</b>                                             | 0-6                                                 | 0-6                                          | 2-5                                             | 0-6                              |
| <b>Per-protocol analysis set (PPS)</b>                   |                                                     |                                              |                                                 |                                  |
|                                                          | <b>Interventional arm (IA; 3 centers),<br/>N=19</b> | <b>Control arm (CA; 3 centers),<br/>N=14</b> | <b>Reference Center (RF; 1 center),<br/>N=8</b> | <b>Per Protocol Set<br/>N=41</b> |
| <b>Gender</b>                                            |                                                     |                                              |                                                 |                                  |
| <b>Male</b>                                              | 8                                                   | 6                                            | 3                                               | 17                               |
| <b>Female</b>                                            | 11                                                  | 8                                            | 5                                               | 24                               |
| <b>Age</b>                                               |                                                     |                                              |                                                 |                                  |
| <b>Mean (SD)</b>                                         | 61 (12)                                             | 55 (15)                                      | 59 (17)                                         | 58 (14)                          |
| <b>Range (years)</b>                                     | 44-87                                               | 30-80                                        | 34-82                                           | 30-87                            |
| <b>Tumor histology</b>                                   |                                                     |                                              |                                                 |                                  |
| <b>Leiomyosarcoma</b>                                    | 5                                                   | 6                                            | 4                                               | 15                               |
| <b>Liposarcoma</b>                                       | 11                                                  | 1                                            | 3                                               | 15                               |
| <b>Others*</b>                                           | 3                                                   | 7                                            | 1                                               | 11                               |
| <b>missing</b>                                           | 0                                                   | 0                                            | 0                                               | 0                                |
| <b>Metastatic disease</b>                                |                                                     |                                              |                                                 |                                  |
| <b>M0</b>                                                | 8                                                   | 5                                            | 2                                               | 15                               |
| <b>M1</b>                                                | 5                                                   | 9                                            | 6                                               | 20                               |
| <b>missing</b>                                           | 6                                                   | 0                                            | 0                                               | 6                                |
| <b>ECOG PS</b>                                           |                                                     |                                              |                                                 |                                  |
| <b>0</b>                                                 | 12                                                  | 8                                            | 4                                               | 24                               |
| <b>1</b>                                                 | 6                                                   | 6                                            | 4                                               | 16                               |
| <b>2</b>                                                 | 1                                                   | 0                                            | 0                                               | 1                                |
| <b>Missing</b>                                           | 0                                                   | 0                                            | 0                                               | 0                                |
| <b>Number of previous cycles of trabectedin</b>          |                                                     |                                              |                                                 |                                  |
| <b>Median</b>                                            | 0                                                   | 1                                            | 1                                               | 1                                |
| <b>Range</b>                                             | 0-15                                                | 0-7                                          | 1-11                                            | 0-15                             |
| <b>Number of previous cycles of another chemotherapy</b> |                                                     |                                              |                                                 |                                  |
| <b>Median</b>                                            | 1                                                   | 1                                            | 2                                               | 2                                |
| <b>Range</b>                                             | 0-4                                                 | 0-3                                          | 2-4                                             | 0-4                              |

\*All subtypes occurring less than four times were merged into this category.

ECOG PS, Eastern Cooperative Oncology Group performance status; SD, standard deviation; M0, no distant metastasis; M1, distant metastasis.

## Primary Outcome

After nine weeks at V4, FACT-G was higher in IA ( $\Delta$  FACT-G total score: -2.4, 95% CI: -9.2-4.5) as compared to the CA ( $\Delta$  FACT-G total score: -3.9, 95% CI: -11.3-3.5;  $P=0.765$ ) (Table 3). The effect size of the intervention on the FACT-G score was  $d=0.269$  (small effect). Intra-cluster correlation was 0. Figure 2 and Supplementary Table 1 depicts absolute FACT-scores trajectories over time. The number of patients experiencing a MCID was equal in both groups (IA: 44% and CA: 43%). The median TUD differed slightly between IA (25 days, 95% CI: 6.2-43.8) and CA (22 days, 95% CI: 16.5-27.5;  $P=0.927$ ).

**Table 3. Change scores after 9 weeks of treatment**

|                                     | Mean change from baseline (V1) to 9 weeks (V4) |          |    |             |           |    | <i>P</i> -value | Interventional trend |
|-------------------------------------|------------------------------------------------|----------|----|-------------|-----------|----|-----------------|----------------------|
|                                     | Interventional arm                             |          |    | Control arm |           |    |                 |                      |
|                                     | mean                                           | 95% CI   | N  | mean        | 95% CI    | N  |                 |                      |
| <b>FACT-G total</b>                 | -2.4                                           | -9.2-4.5 | 18 | -3.9        | -11.3-3.5 | 14 | 0.765           | Beneficial           |
| <b>FACT-G physical well-being</b>   | -1.2                                           | -4.4-2.1 | 18 | -2.2        | -5.4-1.0  | 14 | 0.722           | Beneficial           |
| <b>FACT-G social well-being</b>     | -1.6                                           | -3.1-0.1 | 18 | -0.3        | -2.2-1.7  | 14 | 0.193           | Adverse              |
| <b>FACT-G emotional well-being</b>  | 0.9                                            | -0.6-2.4 | 18 | -0.1        | -2.3-2.1  | 14 | 0.561           | Beneficial           |
| <b>FACT-G functional well-being</b> | -0.5                                           | -2.7-1.7 | 18 | -1.3        | -4.0-1.4  | 14 | 0.536           | Beneficial           |
| <b>HADS depression</b>              | 0.3                                            | -0.6-1.2 | 18 | 0.2         | -2.1-2.5  | 14 | 0.419           | Equivalent           |
| <b>HADS anxiety</b>                 | 0.3                                            | -1.7-2.2 | 18 | -0.8        | -3.0-1.4  | 14 | 0.710           | Adverse              |
| <b>BPI average pain</b>             | 0.6                                            | -0.3-1.5 | 19 | 0.2         | -0.5-1.0  | 14 | 0.788           | Adverse              |
| <b>BPI pain interference</b>        | 0.4                                            | -0.3-1.1 | 18 | 0.1         | -0.5-0.7  | 13 | 0.679           | Adverse              |
| <b>MDASI symptom severity</b>       | 0.7                                            | -0.1-1.4 | 18 | 0.2         | -0.4-0.8  | 14 | 0.442           | Adverse              |
| <b>MDASI symptom interference</b>   | 1.2                                            | 0.9-1.6  | 18 | 0.8         | -0.4-1.9  | 13 | 0.667           | Adverse              |

BPI. Brief Pain Inventory; CI, confidence interval; FACT-G. Functional Assessment for Cancer Therapy; HADS. Hospital Anxiety and Depression scale; MDASI. The M.D. Anderson Symptom Inventory; V. visit; N. number of evaluable patients in respective cluster.

## Secondary Outcomes

Regarding the change of QoL between V1 and V4 (as well as during follow up V7), there was a beneficial impact of the patient-tailored intervention in IA in all FACT-G subscales except for social well-being (Figure 2). There was less decline in physical well-being subscale in IA ( $\Delta$  FACT-G PWB: -1.2, 95% CI: -4.4-2.1) than in CA ( $\Delta$  FACT-G PWB: -2.2, 95% CI: -5.4-1.0;  $P=0.926$ ). Emotional well-being subscale improved slightly in IA ( $\Delta$  FACT-G EWB: 0.9, 95% CI: -0.6-2.4) and remained almost stable in CA ( $\Delta$  FACT-G EWB: -0.1, 95% CI: -2.3-2.1;  $P=0.561$ ). Functional well-being subscale declined less in IA ( $\Delta$  FACT-G FWB: -0.5, 95% CI: -2.7-1.7) than in CA ( $\Delta$  FACT-G FWB: -1.3, 95% CI: -4.0-1.4;  $P=0.536$ ). Lastly, social well-being subscale remained almost stable ( $\Delta$  FACT-G SWB: -0.2, 95% CI: -3.1 -0.1) in CA while decreasing in IA ( $\Delta$  FACT-G SWB: -1.6, 95% CI: -2.2-1.7;  $P=0.952$ ). Overall, there were non-significant, adverse trends in other domains of PRO (MDASI, FAACT, HADS and BPI scales) (Table 3 and Supplementary Table 2).

Overall mean OS was longer in IA than in CA (648 vs. 389 days) without reaching statistical significance ( $P=0.110$ ), while means of PFS were almost identical in IA and CA (249 vs. 232 days;  $P=0.899$ ).

## QoL-Prediction

Univariate regressions revealed that each of the following variables determined the FACT-G total score: symptom severity, symptom interference, depression and anxiety. No influence on the FACT-G total score was found for age, gender, ECOG performance status, patient-satisfaction, anorexia and cachexia (Table 4). In a multivariable

regression, depression determines the FACT-G total score (Table 4).

**Table 4. Univariate and multiple regression of FACT-G total score after nine weeks (V4) on parameters measured at baseline (V1) over all groups**

| <b>Univariate regression</b> |                 |          |                         |
|------------------------------|-----------------|----------|-------------------------|
|                              | <i>P</i> -value | estimate | 95% confidence interval |
| <b>Gender</b>                | 0.154           | 7.5      | -2.8 to 17.8            |
| <b>Age</b>                   | 0.228           | -0.2     | -0.5 to 0.1             |
| <b>ECOG PS</b>               | 0.509           | -3.2     | -12.7 to 6.3            |
| <b>Tumor stage</b>           | 0.284           | -1.8     | -5.1 to 1.5             |
| <b>Symptom severity</b>      | 0.0             | -6.6     | -10.5 to -2.7           |
| <b>Symptom interference</b>  | 0.011           | -3.4     | -6.0 to -0.8            |
| <b>Depression</b>            | 0.0             | -2.7     | -4.3 to -1.1            |
| <b>Anxiety</b>               | 0.034           | -1.4     | -2.7 to -0.1            |
| <b>Patient Satisfaction</b>  | 0.451           | 3.0      | -4.8 to 10.8            |
| <b>Anorexia/Cachexia</b>     | 0.143           | 0.8      | -0.3 to 1.9             |
| <b>Multiple regression</b>   |                 |          |                         |
|                              | <i>P</i> -value | estimate | 95% confidence interval |
| <b>Gender</b>                | 0.844           | 1.0      | -7.2 to 9.4             |
| <b>Age</b>                   | 0.103           | -0.3     | -0.6 to 0.1             |
| <b>ECOG PS</b>               | 0.746           | 1.5      | -6.1 to 9.1             |
| <b>Tumor stage</b>           | 0.586           | -0.8     | -3.4 to 1.7             |
| <b>Symptom severity</b>      | 0.079           | -4.4     | -8.3 to -0.2            |
| <b>Symptom interference</b>  | 0.744           | 0.5      | -1.8 to 2.8             |
| <b>Depression</b>            | 0.025           | -2.2     | -3.9 to -0.7            |
| <b>Anxiety</b>               | 0.869           | -0.1     | -1.5 to 1.3             |
| <b>Patient Satisfaction</b>  | 0.437           | -0.1     | -0.4 to 0.1             |
| <b>Anorexia/Cachexia</b>     | 0.161           | -0.9     | -2.0 to 0.2             |

ECOG PS, Eastern Cooperative Oncology Group performance status.



## DISCUSSION

### Principal findings

To the best of our knowledge, this is the first randomized trial using a patient-directed supportive care intervention to improve QoL and other PRO in sarcoma patients. We observed a trend in favor of the intervention considering the primary endpoint (total FACT-G score) and other secondary outcomes (i.e. physical, functional and emotional well-being QoL subscales). On the other side, MCID and TUD assessments slightly differed between the arms. Not surprisingly and due to the character of palliative disease, absolute numbers in FACT-G-score decline over time. This change is well in line with findings from a multi-center randomized trial, which reported a comparable decline in FACT-G score of ~2 in 281 patients suffering from advanced solid cancers who received early palliative care or standard oncologic care.<sup>36</sup> In addition, the total FACT-G score they observed after twelve weeks (70.1 and 69.6) was comparable to the score found in IA (73.9) and CA (69.4) after nine week of treatment. The total FACT-G score (76.4) was also comparable to the YonLife baseline score (74.2) in a sample of 42 patients suffering from different sarcoma histotypes in a single center, cross-sectional study.<sup>37</sup>

As the intervention yields beneficial effects on QoL, it seemed adverse on symptom domains such as average pain, as well as anxiety and depression. For the former, the applied intervention might not have been timely enough, as adequate pain management needs immediate action instead of recommendation that take several days. Complex syndromes such as anxiety and depression need ongoing treatment, either psycho-oncological or pharmaceutical, which usually take more time to be

1  
2  
3 effective.  
4  
5  
6

### 7 **YonLife-intervention - unanswered questions and future research**

8  
9  
10 There are still many unanswered questions regarding comprehensive QoL interventions.  
11  
12 During the past years, several reports with different interventions tried to shed some  
13  
14 more light on this issue. The YonLife intervention incorporates aspects of other  
15  
16 programs like providing treating physician with pre-collected PROs<sup>17, 24</sup> and, creating a  
17  
18 QoL-profile and using expert's recommendations.<sup>19</sup> In contrast, unlike recently evolving  
19  
20 programs<sup>38</sup>, YonLife did not provide possibility to answer questions using web based  
21  
22 questionnaires accessible from home or mobile device. Furthermore, the PRO-results  
23  
24 were automatically calculated, but were not automatically compared to pre-defined cut-  
25  
26 off or norm data nor were they available in the clinic information system like in other  
27  
28 projects.<sup>39, 40</sup> Thus, the described YonLife intervention needed human support to create  
29  
30 the case vignette that limits the application to busy clinical routine. Advancing technical  
31  
32 opportunities could help overcoming these barriers. YonLife also provided  
33  
34 recommendations thoroughly based on electronic capturing of PRO. Yet, it  
35  
36 demonstrated to be beneficial on QoL in contrast to a palliative intervention based on  
37  
38 the personal encounter.<sup>36</sup> This could be even more relevant in a rare disease such as  
39  
40 sarcoma care, where patients regularly travel long distances to specialized sarcoma  
41  
42 centers.  
43  
44  
45  
46  
47  
48  
49  
50

### 51 **Weaknesses and strengths**

52  
53 Our study has several limitations. As no preceding studies that incorporate a PRO-  
54  
55

1  
2  
3 based individualized intervention existed, our study design and the sample size were set  
4  
5 only for an explorative purpose. Therefore, results were determined to fail statistical  
6  
7 significance and should be interpreted with caution. Furthermore, sarcoma-specific QoL  
8  
9 or symptom-measures are still missing, while the FACT-G and MDASI are generic  
10  
11 instruments, which might not cover syndromes and aspects specific for sarcoma  
12  
13 patients. On the other hand, to overcome the obstacles of limited statistical power, we  
14  
15 applied measures of clinical rather than statistical importance such as the MCID or TUD,  
16  
17 which might be even more important to clinicians in daily practice. Effect sizes are now  
18  
19 available for calculating sample sizes in a larger confirmatory trial.  
20  
21  
22

23  
24 In conclusion, the YonLife trial adds essential knowledge to the scarce data on  
25  
26 PRO in patients with advanced STS. Unlike previous work, it is the first trial that applies  
27  
28 an electronic PRO-assessment and a remote tailored intervention of patients with STS.  
29  
30 Our data suggest that incorporation of validated QoL measures in STS clinical treatment  
31  
32 may further improve the care and understanding of patient wellbeing beyond traditional  
33  
34 clinical measures. Additionally, beyond proving the statistical significance of clinically  
35  
36 important effects, this study is an important prerequisite for future research and holistic  
37  
38 care of patients with advanced STS.  
39  
40  
41  
42  
43  
44  
45  
46  
47  
48  
49  
50  
51  
52  
53  
54  
55  
56  
57  
58  
59  
60

## CONTRIBUTORS

LH and MKS proposed the conception and design of the study, performed data analysis, interpretation and quality control of data and algorithms. MB, LH and MKS are responsible for the manuscript editing. MKS, SR, HGK, BK, AK, VG, TK, UP and JMC performed the data acquisition. All aforementioned authors as well as US, JF, AS, BH and KA participated in the manuscript drafting and review with equal contribution.

## FUNDING

This work was supported by an unrestricted grant from PharmaMar, Spain.

## DATA AVAILABILITY STATEMENT

Complete data sets are available upon reasonable request

## COMPETING INTERESTS

None declared.

## ACKNOWLEDGEMENTS

The trial was coordinated by GWT-TUD, Dresden, Germany. We acknowledge the German Interdisciplinary Sarcoma Group (GISG) for providing support for this trial. The YonLife trial was associated with the German Interdisciplinary Sarcoma Group as GISG-12 project and as AIO-STS-0215 within the 'Arbeitsgemeinschaft Internistische Onkologie' of the 'Deutsche Krebsgesellschaft' (DKG). We would also like to thank Michael Kramer, Kristian Zinke and Rocco Haase for their support on statistical aspects

1  
2  
3  
4  
5  
6  
7  
8  
9  
10  
11  
12  
13  
14  
15  
16  
17  
18  
19  
20  
21  
22  
23  
24  
25  
26  
27  
28  
29  
30  
31  
32  
33  
34  
35  
36  
37  
38  
39  
40  
41  
42  
43  
44  
45  
46  
47  
48  
49  
50  
51  
52  
53  
54  
55  
56  
57  
58  
59  
60

of the study and Felicitas Lenz and Adnan Tanović for proof-reading.

For peer review only

## REFERENCES

1. Gough, N.J., et al., *Symptom burden, survival and palliative care in advanced soft tissue sarcoma*. Sarcoma, 2011. **2011**: p. 325189.
2. Reichardt, P., et al., *Quality of Life and Utility in Patients with Metastatic Soft Tissue and Bone Sarcoma: The Sarcoma Treatment and Burden of Illness in North America and Europe (SABINE) Study*. Sarcoma, 2012. **2012**: p. 740279.
3. Storey, L., et al., *A Critical Review of the Impact of Sarcoma on Psychosocial Wellbeing*. Sarcoma, 2019. **2019**: p. 9730867.
4. McDonough, J., et al., *Health-related quality of life, psychosocial functioning, and unmet health needs in patients with sarcoma: A systematic review*. Psychooncology, 2019. **28**(4): p. 653-664.
5. Ostacoli, L., et al., *Quality of life, anxiety and depression in soft tissue sarcomas as compared to more common tumours: an observational study*. Appl. Res. Qual. Life, 2014. **9**(1): p. 123-131.
6. Tang, M.H., et al., *A systematic review of the recent quality of life studies in adult extremity sarcoma survivors*. Sarcoma, 2012. **2012**: p. 171342.
7. Paredes, T., et al., *Quality of life of sarcoma patients from diagnosis to treatments: predictors and longitudinal trajectories*. Eur J Oncol Nurs, 2011. **15**(5): p. 492-9.
8. Casali, P.G., et al., *Soft tissue and visceral sarcomas: ESMO-EURACAN Clinical Practice Guidelines for diagnosis, treatment and follow-up*. Ann Oncol, 2018. **29**(Supplement\_4): p. iv268-iv269.

- 1  
2  
3 9. Blay, J.Y., et al., *International expert opinion on patient-tailored management of*  
4  
5 *soft tissue sarcomas*. Eur J Cancer, 2014. **50**(4): p. 679-89.  
6
- 7  
8 10. Bonnetain, F., et al., *Time until definitive quality of life score deterioration as a*  
9  
10 *means of longitudinal analysis for treatment trials in patients with metastatic*  
11 *pancreatic adenocarcinoma*. Eur J Cancer, 2010. **46**(15): p. 2753-62.  
12  
13
- 14 11. D'Incalci, M., et al., *Unique features of the mode of action of ET-743*. Oncologist,  
15  
16 2002. **7**(3): p. 210-6.  
17  
18
- 19 12. Larsen, A.K., C.M. Galmarini, and M. D'Incalci, *Unique features of trabectedin*  
20 *mechanism of action*. Cancer Chemother Pharmacol, 2016. **77**(4): p. 663-71.  
21  
22
- 23 13. Demetri, G.D., et al., *Efficacy and safety of trabectedin in patients with advanced*  
24 *or metastatic liposarcoma or leiomyosarcoma after failure of prior anthracyclines*  
25 *and ifosfamide: results of a randomized phase II study of two different schedules*.  
26  
27 J Clin Oncol, 2009. **27**(25): p. 4188-96.  
28  
29
- 30 14. Demetri, G.D., et al., *Efficacy and safety of trabectedin or dacarbazine for*  
31 *metastatic liposarcoma or leiomyosarcoma after failure of conventional*  
32 *chemotherapy: results of a phase III randomized multicenter clinical trial*. J Clin  
33  
34 Oncol, 2016. **34**(8): p. 786-93.  
35  
36  
37  
38  
39
- 40 15. Jones, R.L., et al., *Safety and efficacy of trabectedin when administered in the*  
41 *inpatient versus outpatient setting: Clinical considerations for outpatient*  
42 *administration of trabectedin*. Cancer, 2019. **125**(24): p. 4435-4441.  
43  
44  
45  
46  
47  
48
- 49 16. Basch, E., et al., *Overall Survival Results of a Trial Assessing Patient-Reported*  
50 *Outcomes for Symptom Monitoring During Routine Cancer Treatment*. JAMA,  
51  
52 2017. **318**(2): p. 197-198.  
53  
54  
55

17. Basch, E., et al., *Symptom Monitoring With Patient-Reported Outcomes During Routine Cancer Treatment: A Randomized Controlled Trial*. J Clin Oncol, 2016. **34**(6): p. 557-65.
18. Berry, D.L., et al., *Electronic self-report assessment for cancer and self-care support: results of a multicenter randomized trial*. J Clin Oncol, 2014. **32**(3): p. 199-205.
19. Klinkhammer-Schalke, M., et al., *Direct improvement of quality of life using a tailored quality of life diagnosis and therapy pathway: randomised trial in 200 women with breast cancer*. Br J Cancer, 2012. **106**(5): p. 826-38.
20. Ruland, C.M., et al., *Effects of a computerized system to support shared decision making in symptom management of cancer patients: preliminary results*. J Am Med Inform Assoc, 2003. **10**(6): p. 573-9.
21. Yount, S.E., et al., *A randomized trial of weekly symptom telemonitoring in advanced lung cancer*. J Pain Symptom Manage, 2014. **47**(6): p. 973-89.
22. Winnette, R., et al., *The Patient Experience with Soft Tissue Sarcoma: A Systematic Review of the Literature*. Patient, 2017. **10**(2): p. 153-162.
23. Velikova, G., et al., *Measuring quality of life in routine oncology practice improves communication and patient well-being: a randomized controlled trial*. J Clin Oncol, 2004. **22**(4): p. 714-24.
24. Strasser, F., et al., *The effect of real-time electronic monitoring of patient-reported symptoms and clinical syndromes in outpatient workflow of medical oncologists: E-MOSAIC, a multicenter cluster-randomized phase III study (SAKK 95/06)*. Ann Oncol, 2016. **27**(2): p. 324-32.



- 1  
2  
3 25. Schuler, M., et al., *A cluster-randomised, controlled proof-of-concept study to*  
4 *explore the feasibility and effect of a patient-directed intervention on quality of life*  
5 *in patients with advanced soft tissue sarcoma.* BMJ Open, 2017. **7**(6): p.  
6 e014614.  
7
- 8  
9  
10  
11  
12 26. Cella, D.F., et al., *The Functional Assessment of Cancer Therapy scale:*  
13 *development and validation of the general measure.* J Clin Oncol, 1993. **11**(3): p.  
14 570-9.  
15  
16  
17  
18
- 19 27. King, M.T., et al., *Meta-analysis provides evidence-based interpretation*  
20 *guidelines for the clinical significance of mean differences for the FACT-G, a*  
21 *cancer-specific quality of life questionnaire.* Patient Relat Outcome Meas, 2010.  
22 **1**: p. 119-26.  
23  
24  
25  
26  
27
- 28 28. Cohen, J., *Statistical Power for the Behavioral Sciences (2<sup>nd</sup> Edition).* Lawrence  
29 Erlbaum Associates, 1988.  
30  
31  
32
- 33 29. Cleeland, C.S., et al., *Assessing symptom distress in cancer patients: the M.D.*  
34 *Anderson Symptom Inventory.* Cancer, 2000. **89**(7): p. 1634-46.  
35  
36  
37
- 38 30. Zigmond, A.S. and R.P. Snaith, *The hospital anxiety and depression scale.* Acta  
39 Psychiatr Scand, 1983. **67**(6): p. 361-70.  
40  
41
- 42 31. Singer, S., et al., *Hospital anxiety and depression scale cutoff scores for cancer*  
43 *patients in acute care.* Br J Cancer, 2009. **100**(6): p. 908-12.  
44  
45  
46
- 47 32. Ribaudó, J.M., et al., *Re-validation and shortening of the Functional Assessment*  
48 *of Anorexia/Cachexia Therapy (FAACT) questionnaire.* Qual Life Res, 2000.  
49 **9**(10): p. 1137-46.  
50  
51  
52  
53  
54  
55  
56  
57  
58  
59  
60

- 1  
2  
3 33. Radbruch, L., et al., *Validation of the German version of the Brief Pain Inventory*.  
4  
5 J Pain Symptom Manage, 1999. **18**(3): p. 180-7.  
6  
7  
8 34. Bredart, A., et al., *An international prospective study of the EORTC cancer in-*  
9  
10 *patient satisfaction with care measure (EORTC IN-PATSAT32)*. Eur J Cancer,  
11  
12 2005. **41**(14): p. 2120-31.  
13  
14  
15 35. Brucker, P.S., et al., *General population and cancer patient norms for the*  
16  
17 *Functional Assessment of Cancer Therapy-General (FACT-G)*. Eval Health Prof,  
18  
19 2005. **28**(2): p. 192-211.  
20  
21  
22 36. Franciosi, V., et al., *Early palliative care and quality of life of advanced cancer*  
23  
24 *patients-a multicenter randomized clinical trial*. Ann Palliat Med, 2019. **8**(4): p.  
25  
26 381-389.  
27  
28  
29 37. Chan, A., et al., *Symptom burden and medication use in adult sarcoma patients*.  
30  
31 Support Care Cancer, 2015. **23**(6): p. 1709-17.  
32  
33  
34 38. Warrington, L., et al., *Online tool for monitoring adverse events in patients with*  
35  
36 *cancer during treatment (eRAPID): field testing in a clinical setting*. BMJ Open,  
37  
38 2019. **9**(1): p. e025185.  
39  
40  
41 39. Schuler, M.K., et al., *Implementation of a mobile inpatient quality of life (QoL)*  
42  
43 *assessment for oncology nursing*. Support Care Cancer, 2016. **24**(8): p. 3391-9.  
44  
45  
46 40. Schuler, M., et al., *Implementation and first results of a tablet-based assessment*  
47  
48 *referring to patient-reported outcomes in an inpatient cancer care unit*. Z Evid  
49  
50 Fortbild Qual Gesundheitswes, 2017. **121**: p. 64-72.  
51  
52  
53  
54  
55  
56  
57  
58  
59  
60

Figure 1. CONSORT Flowchart

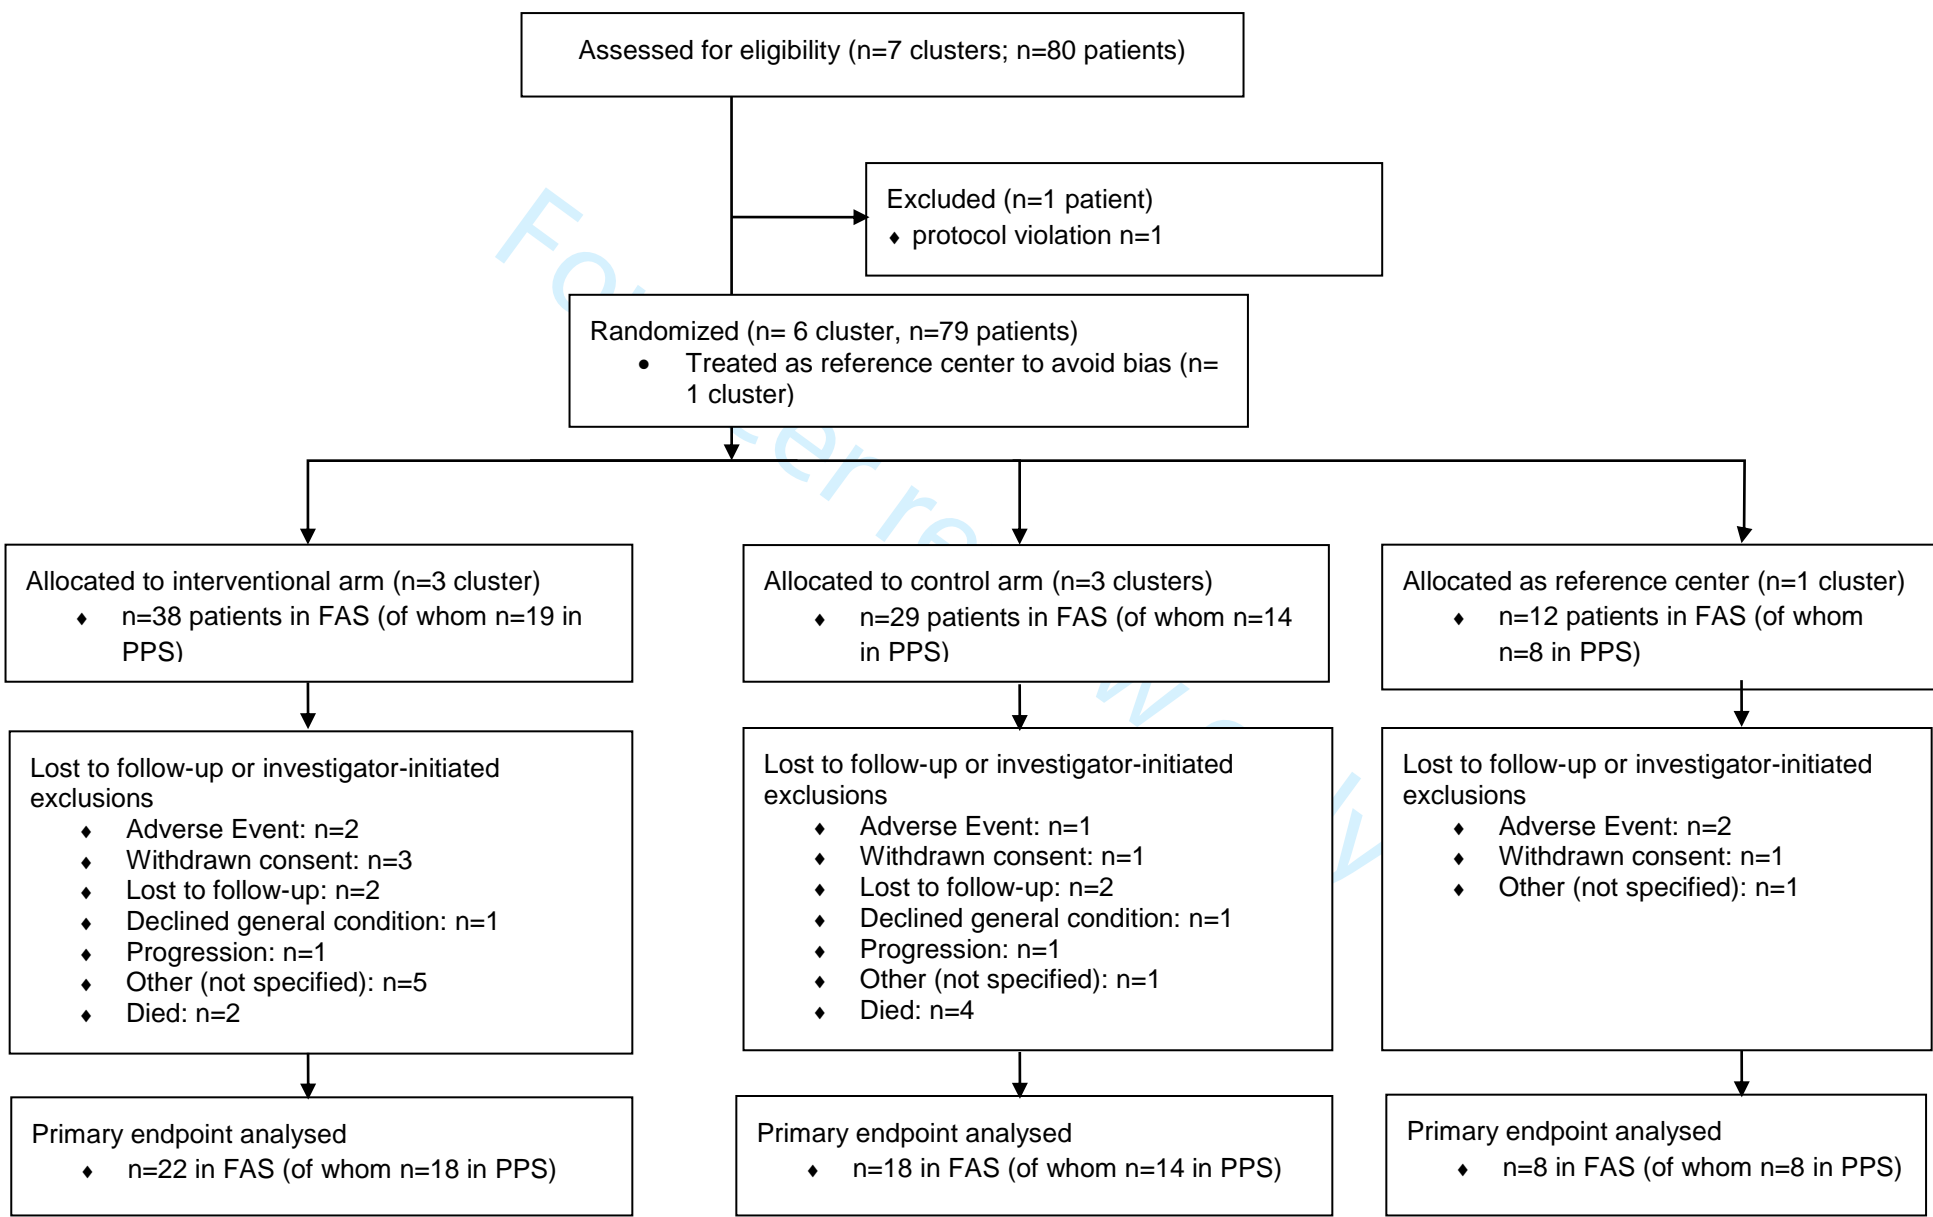

**Figure 2.** Absolute FACT-scores at baseline (V1), after nine weeks of treatment (V4; primary endpoint) and during follow up visit (V7)

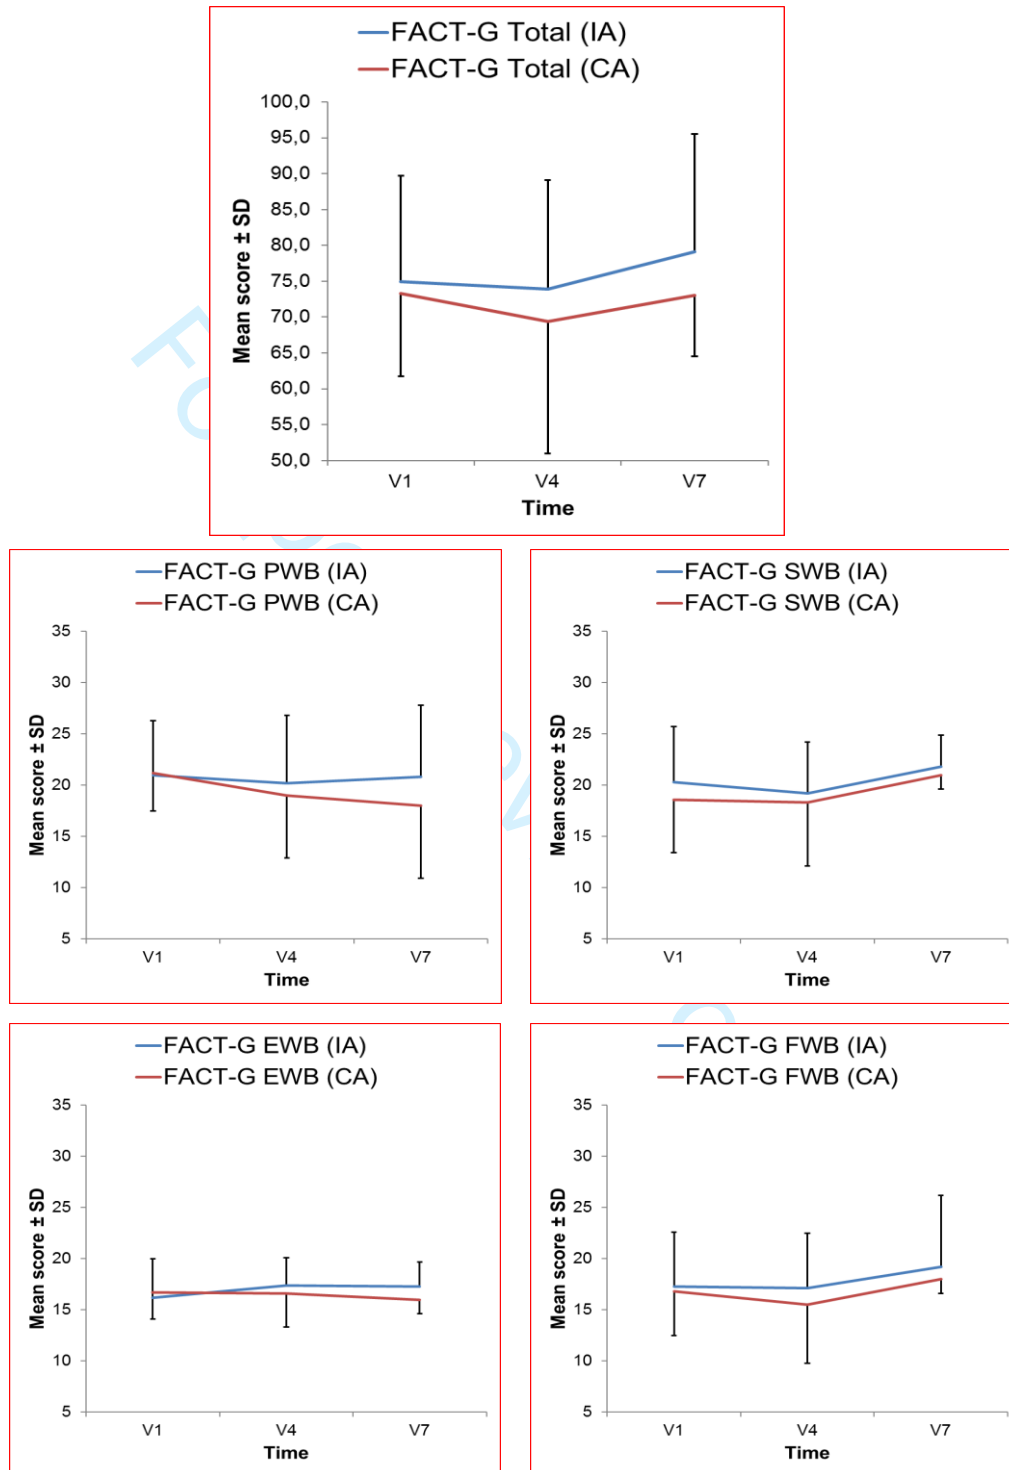

FACT-G, Functional Assessment for Cancer Therapy; EWB, emotional well-being; FWB, functional well-being; PWB, physical well-being; SD, standard deviation; SWB, social well-being; V, visit.

Number of evaluated patients for all FACT-G dimensions per visit and cohort: V1: IA N=19, CA N=14; V4: IA N=18, CA N=14; V7: IA N=9, CA N=2.

**Supplementary Table 1.** Absolute FACT-scores at each assessment time

| Questionnaire                     | Visit | Interventional arm (IA) |      |      | Control arm (CA) |      |      | <i>P</i> -value | Total |      | Effect size at V4<br>Cohen's d |
|-----------------------------------|-------|-------------------------|------|------|------------------|------|------|-----------------|-------|------|--------------------------------|
|                                   |       | N                       | Mean | SD   | N                | Mean | SD   |                 | Mean  | SD   |                                |
| <b>FACT-G total score</b>         | V1    | 19                      | 74.9 | 14.8 | 14               | 73.3 | 11.6 | 0.788           | 74.2  | 13.0 | 0,267                          |
|                                   | V2    | 18                      | 76.8 | 15.1 | 14               | 68.2 | 16.6 | 0.145           | 73.1  | 16.1 |                                |
|                                   | V3    | 18                      | 72.0 | 16.7 | 13               | 70.7 | 11.8 | 0.708           | 72.1  | 14.3 |                                |
|                                   | V4    | 18                      | 73.9 | 15.2 | 14               | 69.4 | 18.4 | 0.512           | 71.6  | 16.2 |                                |
|                                   | V5    | 13                      | 80.2 | 10.8 | 7                | 74.9 | 14.8 | 0.588           | 77.3  | 14.8 |                                |
|                                   | V6    | 14                      | 76.6 | 12.8 | 8                | 80.2 | 11.8 | 0.402           | 77.2  | 13.2 |                                |
|                                   | V7    | 9                       | 79.1 | 16.4 | 2                | 73.0 | 8.5  | 0.582           | 75.7  | 14.9 |                                |
| <b>FACT physical well-being</b>   | V1    | 19                      | 21.0 | 5.3  | 14               | 21.2 | 3.7  | 0.872           | 21.2  | 4.5  | 0,189                          |
|                                   | V2    | 18                      | 21.4 | 5.0  | 14               | 18.7 | 5.4  | 0.168           | 20.3  | 5.2  |                                |
|                                   | V3    | 18                      | 19.3 | 5.6  | 13               | 20.2 | 3.7  | 0.890           | 20.3  | 4.9  |                                |
|                                   | V4    | 18                      | 20.2 | 6.6  | 14               | 19.0 | 6.1  | 0.639           | 19.6  | 6.1  |                                |
|                                   | V5    | 14                      | 22.6 | 3.4  | 7                | 20.9 | 4.5  | 0.971           | 21.8  | 4.0  |                                |
|                                   | V6    | 14                      | 22.0 | 4.4  | 8                | 22.1 | 3.4  | 1.000           | 22.0  | 4.2  |                                |
|                                   | V7    | 9                       | 20.8 | 7.0  | 2                | 18.0 | 7.1  | 0.582           | 19.4  | 6.4  |                                |
| <b>FACT social well-being</b>     | V1    | 19                      | 20.3 | 5.4  | 14               | 18.6 | 5.2  | 0.304           | 19.8  | 5.2  | 0,161                          |
|                                   | V2    | 18                      | 20.5 | 4.6  | 14               | 17.7 | 6.0  | 0.251           | 19.6  | 5.2  |                                |
|                                   | V3    | 18                      | 19.5 | 4.6  | 13               | 17.9 | 4.6  | 0.395           | 19.2  | 4.5  |                                |
|                                   | V4    | 18                      | 19.2 | 5.0  | 14               | 18.3 | 6.2  | 0.896           | 19.3  | 5.3  |                                |
|                                   | V5    | 14                      | 20.9 | 3.9  | 7                | 20.4 | 5.1  | 0.913           | 20.5  | 4.5  |                                |
|                                   | V6    | 14                      | 20.7 | 2.7  | 8                | 22.2 | 3.2  | 0.188           | 21.2  | 3.2  |                                |
|                                   | V7    | 9                       | 21.8 | 3.1  | 2                | 21.0 | 1.4  | 0.727           | 21.3  | 3.8  |                                |
| <b>FACT emotional well-being</b>  | V1    | 19                      | 16.2 | 3.8  | 14               | 16.7 | 2.6  | 0.986           | 16.0  | 3.3  | 0,267                          |
|                                   | V2    | 18                      | 17.0 | 3.3  | 14               | 16.6 | 2.6  | 0.667           | 16.5  | 3.7  |                                |
|                                   | V3    | 18                      | 17.0 | 4.0  | 13               | 17.7 | 3.1  | 0.767           | 16.7  | 3.8  |                                |
|                                   | V4    | 18                      | 17.4 | 2.7  | 14               | 16.6 | 3.3  | 0.377           | 16.6  | 3.3  |                                |
|                                   | V5    | 13                      | 17.7 | 2.2  | 7                | 17.1 | 1.2  | 0.393           | 17.1  | 2.3  |                                |
|                                   | V6    | 14                      | 16.8 | 3.4  | 8                | 16.6 | 3.2  | 0.570           | 16.1  | 3.6  |                                |
|                                   | V7    | 9                       | 17.3 | 2.4  | 2                | 16.0 | 1.4  | 0.327           | 16.9  | 3.1  |                                |
| <b>FACT functional well-being</b> | V1    | 19                      | 17.3 | 5.3  | 14               | 16.8 | 4.3  | 0.900           | 17.2  | 4.5  | 0,288                          |
|                                   | V2    | 18                      | 17.9 | 5.4  | 14               | 15.1 | 5.9  | 0.319           | 16.7  | 5.4  |                                |
|                                   | V3    | 18                      | 16.1 | 6.4  | 13               | 14.9 | 4.5  | 0.679           | 16.0  | 5.4  |                                |
|                                   | V4    | 18                      | 17.1 | 5.4  | 14               | 15.5 | 5.7  | 0.512           | 16.2  | 5.4  |                                |
|                                   | V5    | 13                      | 18.8 | 4.6  | 7                | 16.4 | 5.3  | 0.485           | 17.9  | 4.5  |                                |
|                                   | V6    | 14                      | 17.1 | 6.1  | 8                | 19.3 | 3.8  | 0.441           | 17.9  | 5.4  |                                |
|                                   | V7    | 9                       | 19.2 | 7.0  | 2                | 18.0 | 1.4  | 0.909           | 18.0  | 6.0  |                                |

FACT-G, Functional Assessment for Cancer Therapy; SD, standard deviation; V, visit; N, number of patients

**Supplementary Table 2.** Absolute scores of secondary outcomes

| Questionnaire             | Visit | Interventional arm (IA) |      |      | Control arm (CA) |      |      | <i>P</i> -value | Total |      | Effect size at V4<br>Cohen's d |
|---------------------------|-------|-------------------------|------|------|------------------|------|------|-----------------|-------|------|--------------------------------|
|                           |       | N                       | Mean | SD   | N                | Mean | SD   |                 | Mean  | SD   |                                |
| <b>FAACT score</b>        |       |                         |      |      |                  |      |      |                 |       |      |                                |
|                           | V1    | 19                      | 37,9 | 4,3  | 14               | 39,1 | 5,4  | 0,439           | 38,3  | 4,8  |                                |
|                           | V2    | 18                      | 37,9 | 5,2  | 14               | 39,1 | 6,0  | 0,398           | 38,7  | 5,3  |                                |
|                           | V3    | 18                      | 37,4 | 5,5  | 13               | 37,9 | 5,2  | 0,828           | 38,1  | 5,0  |                                |
|                           | V4    | 18                      | 35,0 | 6,7  | 14               | 38,6 | 7,1  | 0,099           | 36,9  | 6,4  | -0,522                         |
|                           | V5    | 13                      | 39,3 | 4,5  | 7                | 37,3 | 8,9  | 0,877           | 37,7  | 6,2  |                                |
|                           | V6    | 14                      | 38,3 | 4,7  | 8                | 40,3 | 4,3  | 0,365           | 38,6  | 4,8  |                                |
|                           | V7    | 9                       | 33,0 | 11,8 | 2                | 34,0 | 14,1 | 1,000           | 33,2  | 10,0 |                                |
| <b>MDASI severity</b>     |       |                         |      |      |                  |      |      |                 |       |      |                                |
|                           | V1    | 19                      | 1,9  | 1,5  | 14               | 1,9  | 1,5  | 1,000           | 2,0   | 1,4  |                                |
|                           | V2    | 18                      | 2,0  | 1,5  | 14               | 2,5  | 1,6  | 0,464           | 2,2   | 1,6  |                                |
|                           | V3    | 18                      | 2,5  | 1,4  | 13               | 2,0  | 1,0  | 0,417           | 2,2   | 1,3  |                                |
|                           | V4    | 18                      | 2,4  | 1,6  | 14               | 2,1  | 1,6  | 0,561           | 2,2   | 1,6  | 0,188                          |
|                           | V5    | 13                      | 2,0  | 0,9  | 7                | 2,7  | 1,6  | 0,588           | 2,1   | 1,3  |                                |
|                           | V6    | 14                      | 2,1  | 1,2  | 8                | 2,4  | 1,7  | 0,868           | 2,2   | 1,5  |                                |
|                           | V7    | 9                       | 2,5  | 1,6  | 2                | 2,2  | 1,7  | 1,000           | 2,6   | 1,9  |                                |
| <b>MDASI interference</b> |       |                         |      |      |                  |      |      |                 |       |      |                                |
|                           | V1    | 19                      | 1,9  | 2,1  | 14               | 2,2  | 1,6  | 0,397           | 2,1   | 2,0  |                                |
|                           | V2    | 18                      | 2,2  | 2,0  | 14               | 3,4  | 1,9  | 0,065           | 2,6   | 2,0  |                                |
|                           | V3    | 18                      | 2,8  | 2,3  | 13               | 2,9  | 1,6  | 0,798           | 2,8   | 2,0  |                                |
|                           | V4    | 18                      | 3,0  | 2,1  | 14               | 2,9  | 2,2  | 0,837           | 2,9   | 2,2  | 0,047                          |
|                           | V5    | 13                      | 2,2  | 1,8  | 7                | 2,8  | 2,3  | 0,588           | 2,2   | 1,8  |                                |
|                           | V6    | 14                      | 2,3  | 1,7  | 8                | 2,9  | 1,9  | 0,570           | 2,4   | 1,8  |                                |
|                           | V7    | 9                       | 0,6  | 2,6  | 2                | 3,3  | 3,1  | 1,000           | 2,9   | 2,6  |                                |

FAACT, Functional Assessment of Anorexia/Cachexia Therapy questionnaire; MDASI, The M.D. Anderson Symptom Inventory; SD, standard deviation; V, visit; N, number of patients.

**Table 1: CONSORT 2010 checklist of information to include when reporting a cluster randomised trial**

| Section/Topic                    | Item No | Standard Checklist item                                                                                                                | Extension for cluster designs                                                                 | Page No *        |
|----------------------------------|---------|----------------------------------------------------------------------------------------------------------------------------------------|-----------------------------------------------------------------------------------------------|------------------|
| <b>Title and abstract</b>        |         |                                                                                                                                        |                                                                                               |                  |
|                                  | 1a      | Identification as a randomised trial in the title                                                                                      | Identification as a cluster randomised trial in the title                                     | Yes, p.1         |
|                                  | 1b      | Structured summary of trial design, methods, results, and conclusions (for specific guidance see CONSORT for abstracts) <sup>1,2</sup> | See table 2                                                                                   | Yes, p. 2-3      |
| <b>Introduction</b>              |         |                                                                                                                                        |                                                                                               |                  |
| <b>Background and objectives</b> | 2a      | Scientific background and explanation of rationale                                                                                     | Rationale for using a cluster design                                                          | Yes, 5-7 and p10 |
|                                  | 2b      | Specific objectives or hypotheses                                                                                                      | Whether objectives pertain to the the cluster level, the individual participant level or both | Yes, p.8-9       |
| <b>Methods</b>                   |         |                                                                                                                                        |                                                                                               |                  |
| <b>Trial design</b>              | 3a      | Description of trial design (such as parallel, factorial) including allocation ratio                                                   | Definition of cluster and description of how the design features apply to the clusters        | Yes, p.8         |
|                                  | 3b      | Important changes to methods after trial commencement (such as eligibility criteria), with reasons                                     |                                                                                               | Not applicable   |
| <b>Participants</b>              | 4a      | Eligibility criteria for participants                                                                                                  | Eligibility criteria for clusters                                                             | Yes, p.8         |
|                                  | 4b      | Settings and locations where the data were collected                                                                                   |                                                                                               | Yes, p.8         |
| <b>Interventions</b>             | 5       | The interventions for each group with sufficient details to allow replication, including how and when they were actually administered  | Whether interventions pertain to the cluster level, the individual participant level or both  | Yes, p.9         |

|                                         |     |                                                                                                                                                                                             |                                                                                                                                                                                                                         |                |
|-----------------------------------------|-----|---------------------------------------------------------------------------------------------------------------------------------------------------------------------------------------------|-------------------------------------------------------------------------------------------------------------------------------------------------------------------------------------------------------------------------|----------------|
| <b>Outcomes</b>                         | 6a  | Completely defined pre-specified primary and secondary outcome measures, including how and when they were assessed                                                                          | Whether outcome measures pertain to the cluster level, the individual participant level or both                                                                                                                         | Yes, 10-12     |
|                                         | 6b  | Any changes to trial outcomes after the trial commenced, with reasons                                                                                                                       |                                                                                                                                                                                                                         | Not applicable |
| <b>Sample size</b>                      | 7a  | How sample size was determined                                                                                                                                                              | Method of calculation, number of clusters(s) (and whether equal or unequal cluster sizes are assumed), cluster size, a coefficient of intracluster correlation (ICC or <i>k</i> ), and an indication of its uncertainty | Yes, 12-13     |
|                                         | 7b  | When applicable, explanation of any interim analyses and stopping guidelines                                                                                                                |                                                                                                                                                                                                                         | Not applicable |
| <b>Randomisation:</b>                   |     |                                                                                                                                                                                             |                                                                                                                                                                                                                         |                |
| <b>Sequence generation</b>              | 8a  | Method used to generate the random allocation sequence                                                                                                                                      |                                                                                                                                                                                                                         | Yes, p.10      |
|                                         | 8b  | Type of randomisation; details of any restriction (such as blocking and block size)                                                                                                         | Details of stratification or matching if used                                                                                                                                                                           | Yes, p.10      |
| <b>Allocation concealment mechanism</b> | 9   | Mechanism used to implement the random allocation sequence (such as sequentially numbered containers), describing any steps taken to conceal the sequence until interventions were assigned | Specification that allocation was based on clusters rather than individuals and whether allocation concealment (if any) was at the cluster level, the individual participant level or both                              | Yes, p. 10     |
| <b>Implementation</b>                   | 10  | Who generated the random allocation sequence, who enrolled participants, and who assigned participants to interventions                                                                     | Replace by 10a, 10b and 10c                                                                                                                                                                                             | Yes            |
|                                         | 10a |                                                                                                                                                                                             | Who generated the random allocation sequence, who                                                                                                                                                                       | Yes            |



|                            |     |                                                                                                                                                |                                                                                                                                                                     |                |
|----------------------------|-----|------------------------------------------------------------------------------------------------------------------------------------------------|---------------------------------------------------------------------------------------------------------------------------------------------------------------------|----------------|
|                            |     |                                                                                                                                                | enrolled clusters, and who assigned clusters to interventions                                                                                                       |                |
|                            | 10b |                                                                                                                                                | Mechanism by which individual participants were included in clusters for the purposes of the trial (such as complete enumeration, random sampling)                  | Yes            |
|                            | 10c |                                                                                                                                                | From whom consent was sought (representatives of the cluster, or individual cluster members, or both), and whether consent was sought before or after randomisation | Yes            |
| <b>Blinding</b>            |     |                                                                                                                                                |                                                                                                                                                                     |                |
|                            | 11a | If done, who was blinded after assignment to interventions (for example, participants, care providers, those assessing outcomes) and how       |                                                                                                                                                                     | Not done       |
|                            | 11b | If relevant, description of the similarity of interventions                                                                                    |                                                                                                                                                                     | Not applicable |
| <b>Statistical methods</b> |     |                                                                                                                                                |                                                                                                                                                                     |                |
|                            | 12a | Statistical methods used to compare groups for primary and secondary outcomes                                                                  | How clustering was taken into account                                                                                                                               | Yes, p.12      |
|                            | 12b | Methods for additional analyses, such as subgroup analyses and adjusted analyses                                                               |                                                                                                                                                                     | Yes, p.12      |
| <b>Results</b>             |     |                                                                                                                                                |                                                                                                                                                                     |                |
|                            | 13a | For each group, the numbers of participants who were randomly assigned, received intended treatment, and were analysed for the primary outcome | For each group, the numbers of clusters that were randomly assigned, received intended treatment, and were analysed for the primary outcome                         | Yes, figure 1  |
|                            | 13b | For each group, losses and exclusions after randomisation, together with reasons                                                               | For each group, losses and exclusions for both clusters and individual cluster members                                                                              | Yes, figure 1  |

|                                |     |                                                                                                                                                   |                                                                                                                                            |                |
|--------------------------------|-----|---------------------------------------------------------------------------------------------------------------------------------------------------|--------------------------------------------------------------------------------------------------------------------------------------------|----------------|
| <b>Recruitment</b>             | 14a | Dates defining the periods of recruitment and follow-up                                                                                           |                                                                                                                                            | Yes, p.9       |
|                                | 14b | Why the trial ended or was stopped                                                                                                                |                                                                                                                                            | Yes            |
| <b>Baseline data</b>           | 15  | A table showing baseline demographic and clinical characteristics for each group                                                                  | Baseline characteristics for the individual and cluster levels as applicable for each group                                                | Yes, table 2   |
| <b>Numbers analysed</b>        | 16  | For each group, number of participants (denominator) included in each analysis and whether the analysis was by original assigned groups           | For each group, number of clusters included in each analysis                                                                               | Yes            |
| <b>Outcomes and estimation</b> | 17a | For each primary and secondary outcome, results for each group, and the estimated effect size and its precision (such as 95% confidence interval) | Results at the individual or cluster level as applicable and a coefficient of intracluster correlation (ICC or k) for each primary outcome | Yes            |
|                                | 17b | For binary outcomes, presentation of both absolute and relative effect sizes is recommended                                                       |                                                                                                                                            | Yes            |
| <b>Ancillary analyses</b>      | 18  | Results of any other analyses performed, including subgroup analyses and adjusted analyses, distinguishing pre-specified from exploratory         |                                                                                                                                            | Yes            |
| <b>Harms</b>                   | 19  | All important harms or unintended effects in each group (for specific guidance see CONSORT for harms <sup>3</sup> )                               |                                                                                                                                            | Not applicable |
| <b>Discussion</b>              |     |                                                                                                                                                   |                                                                                                                                            |                |
| <b>Limitations</b>             | 20  | Trial limitations, addressing sources of potential bias, imprecision, and, if relevant, multiplicity of analyses                                  |                                                                                                                                            | Yes, p. 17-18  |
| <b>Generalisability</b>        | 21  | Generalisability (external validity, applicability) of the trial findings                                                                         | Generalisability to clusters and/or individual participants (as relevant)                                                                  | Yes            |

|                          |    |                                                                                                               |              |
|--------------------------|----|---------------------------------------------------------------------------------------------------------------|--------------|
| <b>Interpretation</b>    | 22 | Interpretation consistent with results, balancing benefits and harms, and considering other relevant evidence | Yes, p.16-17 |
| <b>Other information</b> |    |                                                                                                               |              |
| <b>Registration</b>      | 23 | Registration number and name of trial registry                                                                | Yes, p.3     |
| <b>Protocol</b>          | 24 | Where the full trial protocol can be accessed, if available                                                   | Yes, p.8     |
| <b>Funding</b>           | 25 | Sources of funding and other support (such as supply of drugs), role of funders                               | Yes, p.19    |

\* Note: page numbers optional depending on journal requirements

**Table 2: Extension of CONSORT for abstracts<sup>1,2</sup> to reports of cluster randomised trials**

| Item                      | Standard Checklist item                                                                                     | Extension for cluster trials                                                                                   |
|---------------------------|-------------------------------------------------------------------------------------------------------------|----------------------------------------------------------------------------------------------------------------|
| <b>Title</b>              | Identification of study as randomised                                                                       | <b>Identification of study as cluster randomised</b>                                                           |
| <b>Trial design</b>       | Description of the trial design (e.g. parallel, cluster, non-inferiority)                                   |                                                                                                                |
| <b>Methods</b>            |                                                                                                             |                                                                                                                |
| <b>Participants</b>       | Eligibility criteria for participants and the settings where the data were collected                        | <b>Eligibility criteria for clusters</b>                                                                       |
| <b>Interventions</b>      | Interventions intended for each group                                                                       |                                                                                                                |
| <b>Objective</b>          | Specific objective or hypothesis                                                                            | <b>Whether objective or hypothesis pertains to the cluster level, the individual participant level or both</b> |
| <b>Outcome</b>            | Clearly defined primary outcome for this report                                                             | <b>Whether the primary outcome pertains to the cluster level, the individual participant level or both</b>     |
| <b>Randomization</b>      | How participants were allocated to interventions                                                            | <b>How clusters were allocated to interventions</b>                                                            |
| <b>Blinding (masking)</b> | Whether or not participants, care givers, and those assessing the outcomes were blinded to group assignment |                                                                                                                |
| <b>Results</b>            |                                                                                                             |                                                                                                                |
| <b>Numbers randomized</b> | Number of participants randomized to each group                                                             | <b>Number of clusters randomized to each group</b>                                                             |
| <b>Recruitment</b>        | Trial status <sup>1</sup>                                                                                   |                                                                                                                |
| <b>Numbers analysed</b>   | Number of participants analysed in each group                                                               | <b>Number of clusters analysed in each group</b>                                                               |
| <b>Outcome</b>            | For the primary outcome, a result for each group and the estimated effect size and its precision            | <b>Results at the cluster or individual participant level as applicable for each primary outcome</b>           |
| <b>Harms</b>              | Important adverse events or side effects                                                                    |                                                                                                                |
| <b>Conclusions</b>        | General interpretation of the results                                                                       |                                                                                                                |
| <b>Trial registration</b> | Registration number and name of trial register                                                              |                                                                                                                |
| <b>Funding</b>            | Source of funding                                                                                           |                                                                                                                |

<sup>1</sup> Relevant to Conference Abstracts

## REFERENCES

---

- 1 Hopewell S, Clarke M, Moher D, Wager E, Middleton P, Altman DG, et al. CONSORT for reporting randomised trials in journal and conference abstracts. *Lancet* 2008, 371:281-283
- 2 Hopewell S, Clarke M, Moher D, Wager E, Middleton P, Altman DG at al (2008) CONSORT for reporting randomized controlled trials in journal and conference abstracts: explanation and elaboration. *PLoS Med* 5(1): e20
- 3 Ioannidis JP, Evans SJ, Gotzsche PC, O'Neill RT, Altman DG, Schulz K, Moher D. Better reporting of harms in randomized trials: an extension of the CONSORT statement. *Ann Intern Med* 2004; 141(10):781-788.

For peer review only

# BMJ Open

**Quality of life and added value of a tailored palliative care intervention in patients with soft tissue sarcoma undergoing treatment with trabectedin: A multicenter, cluster-randomized trial within the Germany Interdisciplinary Sarcoma Group (GISG)**

|                                 |                                                                                                                                                                                                                                                                                                                                                                                                                                                                                                                                                                                                                                                                                                                                                                                                                                                                                                                                                                                                                                                                                                                                                                                                                                                                                                                                                                                                                                                                                                                                                                                                                                                                                                                                                                                                     |
|---------------------------------|-----------------------------------------------------------------------------------------------------------------------------------------------------------------------------------------------------------------------------------------------------------------------------------------------------------------------------------------------------------------------------------------------------------------------------------------------------------------------------------------------------------------------------------------------------------------------------------------------------------------------------------------------------------------------------------------------------------------------------------------------------------------------------------------------------------------------------------------------------------------------------------------------------------------------------------------------------------------------------------------------------------------------------------------------------------------------------------------------------------------------------------------------------------------------------------------------------------------------------------------------------------------------------------------------------------------------------------------------------------------------------------------------------------------------------------------------------------------------------------------------------------------------------------------------------------------------------------------------------------------------------------------------------------------------------------------------------------------------------------------------------------------------------------------------------|
| Journal:                        | <i>BMJ Open</i>                                                                                                                                                                                                                                                                                                                                                                                                                                                                                                                                                                                                                                                                                                                                                                                                                                                                                                                                                                                                                                                                                                                                                                                                                                                                                                                                                                                                                                                                                                                                                                                                                                                                                                                                                                                     |
| Manuscript ID                   | bmjopen-2019-035546.R3                                                                                                                                                                                                                                                                                                                                                                                                                                                                                                                                                                                                                                                                                                                                                                                                                                                                                                                                                                                                                                                                                                                                                                                                                                                                                                                                                                                                                                                                                                                                                                                                                                                                                                                                                                              |
| Article Type:                   | Original research                                                                                                                                                                                                                                                                                                                                                                                                                                                                                                                                                                                                                                                                                                                                                                                                                                                                                                                                                                                                                                                                                                                                                                                                                                                                                                                                                                                                                                                                                                                                                                                                                                                                                                                                                                                   |
| Date Submitted by the Author:   | 05-Jun-2020                                                                                                                                                                                                                                                                                                                                                                                                                                                                                                                                                                                                                                                                                                                                                                                                                                                                                                                                                                                                                                                                                                                                                                                                                                                                                                                                                                                                                                                                                                                                                                                                                                                                                                                                                                                         |
| Complete List of Authors:       | <p>Hentschel, Leopold; University Hospital Carl Gustav Carus, Department of Psychooncology of the University Cancer Center<br/> Richter, Stephan; University Hospital Carl Gustav Carus, Department of Internal Medicine I<br/> Kopp, Hans-Georg; Robert-Bosch-Center of Tumor Diseases, Interdisciplinary Center for Soft-Tissue-Sarcoma, GIST and Bone-Tumor<br/> Kasper, Bernd; University Medical Center Mannheim, Medical Faculty Mannheim, University of Heidelberg, Sarcoma Unit, Interdisciplinary Tumor Center<br/> Kunitz, Annegret; Vivantes Clinic Spandau, Internal Medicine<br/> Grünwald, Viktor ; University Hospital Essen, Interdisciplinary Genitourinary Oncology/West-German Cancer Center<br/> Kessler, Torsten; University Hospital of Münster, Hematology Oncology<br/> Chemnitz, Jens Marcus; ev. Stift St. Martin, Internal Medicine<br/> Pelzer, Uwe; Charité Medical University, Division of Hematology, Oncology and Tumor Immunology<br/> Schuler, Ulrich; University Hospital Carl Gustav Carus, University Palliative Center<br/> Freitag, Janet; University Hospital Carl Gustav Carus, Department of Internal Medicine I<br/> Schilling, Andrea; University Hospital Carl Gustav Carus, Department of Social Work<br/> Hornemann, Beate; University Hospital Carl Gustav Carus, Department of Psychooncology of the University Cancer Center<br/> Arndt, Karin; Das Lebenshaus e.V, Patient Advocacy<br/> Bornhaeuser, Martin; University Hospital Carl Gustav Carus, Department of Internal Medicine I; Deutsches Krebsforschungszentrum, National Center for Tumor Diseases (NCT)<br/> Schuler, Markus Kajo; University Hospital Carl Gustav Carus, Department of Internal Medicine I; HELIOS Hospital Emil von Behring, Department of Internal Medicine II</p> |
| <b>Primary Subject Heading</b>: | Palliative care                                                                                                                                                                                                                                                                                                                                                                                                                                                                                                                                                                                                                                                                                                                                                                                                                                                                                                                                                                                                                                                                                                                                                                                                                                                                                                                                                                                                                                                                                                                                                                                                                                                                                                                                                                                     |
| Secondary Subject Heading:      | Patient-centred medicine                                                                                                                                                                                                                                                                                                                                                                                                                                                                                                                                                                                                                                                                                                                                                                                                                                                                                                                                                                                                                                                                                                                                                                                                                                                                                                                                                                                                                                                                                                                                                                                                                                                                                                                                                                            |

1  
2  
3  
4  
5  
6  
7  
8  
9  
10  
11  
12  
13  
14  
15  
16  
17  
18  
19  
20  
21  
22  
23  
24  
25  
26  
27  
28  
29  
30  
31  
32  
33  
34  
35  
36  
37  
38  
39  
40  
41  
42  
43  
44  
45  
46  
47  
48  
49  
50  
51  
52  
53  
54  
55  
56  
57  
58  
59  
60

|           |                                                                                                                  |
|-----------|------------------------------------------------------------------------------------------------------------------|
| Keywords: | Sarcoma < ONCOLOGY, Quality in health care < HEALTH SERVICES ADMINISTRATION & MANAGEMENT, Cancer pain < ONCOLOGY |
|           |                                                                                                                  |

SCHOLARONE™  
Manuscripts



I, the Submitting Author has the right to grant and does grant on behalf of all authors of the Work (as defined in the below author licence), an exclusive licence and/or a non-exclusive licence for contributions from authors who are: i) UK Crown employees; ii) where BMJ has agreed a CC-BY licence shall apply, and/or iii) in accordance with the terms applicable for US Federal Government officers or employees acting as part of their official duties; on a worldwide, perpetual, irrevocable, royalty-free basis to BMJ Publishing Group Ltd ("BMJ") its licensees and where the relevant Journal is co-owned by BMJ to the co-owners of the Journal, to publish the Work in this journal and any other BMJ products and to exploit all rights, as set out in our [licence](#).

The Submitting Author accepts and understands that any supply made under these terms is made by BMJ to the Submitting Author unless you are acting as an employee on behalf of your employer or a postgraduate student of an affiliated institution which is paying any applicable article publishing charge ("APC") for Open Access articles. Where the Submitting Author wishes to make the Work available on an Open Access basis (and intends to pay the relevant APC), the terms of reuse of such Open Access shall be governed by a Creative Commons licence – details of these licences and which [Creative Commons](#) licence will apply to this Work are set out in our licence referred to above.

Other than as permitted in any relevant BMJ Author's Self Archiving Policies, I confirm this Work has not been accepted for publication elsewhere, is not being considered for publication elsewhere and does not duplicate material already published. I confirm all authors consent to publication of this Work and authorise the granting of this licence.



## Original Research

**Quality of life and added value of a tailored palliative care intervention in patients with soft tissue sarcoma undergoing treatment with trabectedin: A multicenter, cluster-randomized trial within the Germany Interdisciplinary Sarcoma Group (GISG)**

Leopold Hentschel<sup>a</sup>, Stephan Richter<sup>b</sup>, Hans-Georg Kopp<sup>c</sup>, Bernd Kasper<sup>d</sup>, Annegret Kunitz<sup>e</sup>, Viktor Grünwald<sup>f</sup>, Torsten Kessler<sup>g</sup>, Jens Marcus Chemnitz<sup>h</sup>, Uwe Pelzer<sup>i</sup>, Ulrich Schuler<sup>j</sup>, Janet Freitag<sup>b</sup>, Andrea Schilling<sup>k</sup>, Beate Hornemann<sup>a</sup>, Karin Arndt<sup>l</sup>, Martin Bornhäuser<sup>b,m</sup>, Markus Kajo Schuler<sup>b,n</sup>

## Author affiliations

- <sup>a</sup> Department of Psychooncology of the University Cancer Center, University Hospital Carl Gustav Carus, Dresden, Germany
- <sup>b</sup> Department of Internal Medicine I, University Hospital Carl Gustav Carus, TU Dresden, Dresden, Germany
- <sup>c</sup> Interdisciplinary Center for Soft-Tissue-Sarcoma, GIST and Bone-Tumor, Robert-Bosch-Center of Tumor Diseases, Stuttgart, Germany
- <sup>d</sup> Sarcoma Unit, Interdisciplinary Tumor Center, University Medical Center, University of Heidelberg, Mannheim, Germany
- <sup>e</sup> Internal Medicine, Vivantes Clinic Spandau, Berlin, Germany
- <sup>f</sup> Interdisciplinary Genitourinary Oncology/West-German Cancer Center, University Hospital Essen, Essen, Germany
- <sup>g</sup> Hematology Oncology, University Hospital of Münster, Münster, Germany
- <sup>h</sup> Internal Medicine, Ev. Stift St. Martin, Koblenz, Germany
- <sup>i</sup> Division of Hematology, Oncology and Tumor Immunology, Charité Medical University, Berlin, Germany
- <sup>j</sup> University Palliative Center, University Hospital Carl Gustav Carus, Dresden, Germany
- <sup>k</sup> Department of Social Work, University Hospital Carl Gustav Carus, Dresden, Germany
- <sup>l</sup> Patient Advocacy „Das Lebenshaus e.V.“, Wölfersheim, Germany
- <sup>m</sup> National Center for Tumor Diseases (NCT), Deutsches Krebsforschungszentrum, Heidelberg, Germany
- <sup>n</sup> Department of Internal Medicine II, Helios Hospital Emil von Behring, Berlin, Germany

**Correspondence to:**

**Mr. Leopold Hentschel, Dipl. Psych.**

University Cancer Center, University Hospital Carl Gustav Carus, Fetscherstraße 74, 01307 Dresden, Germany

Phone: +49-351-458-7120

E-mail: [Leopold.Hentschel@uniklinikum-dresden.de](mailto:Leopold.Hentschel@uniklinikum-dresden.de)

## ABSTRACT

**Objectives:** The choice of drug treatment in advanced soft tissue sarcoma (STS) continues to be a challenge regarding efficacy, quality of life (QoL) and toxicity. Unlike other cancer types, where integrating patient-reported outcomes (PRO) has proven to be beneficial for QoL, there is no such evidence in patients with STS as of now. The YonLife trial aimed to explore the effect of a tailored multi-step intervention on QoL, symptoms and survival in patients with advanced STS undergoing treatment with trabectedin as well as identifying predictors of QoL.

**Design:** YonLife is a cluster-randomized, open-label, proof-of-concept study. The intervention incorporates electronic PRO-assessment, a case-vignette and expert-consented treatment recommendations.

**Participants:** Six hospitals were randomized to the control arm (CA) or interventional arm (IA). Seventy-nine patients were included of whom 40 were analyzed as per-protocol set.

**Primary and secondary outcome measures:** The primary endpoint was the change of FACT-G total score after nine weeks. Secondary outcomes included QoL (FACT-G subscales), anorexia and cachexia (FAACT), symptoms (MDASI), anxiety and depression (HADS), pain intensity and interference (BPI), and survival assessment.

**Results:** After nine weeks of treatment QoL declined less in the IA ( $\Delta$  FACT-G total score: -2.4, 95% CI: -9.2 to 4.5) as compared to CA ( $\Delta$  FACT-G total score: -3.9; 95% CI: -11.3 to 3.5;  $P=0.765$ ). In almost all FACT-G subscales, average declines were lower in IA, but without reaching statistical significance. Smaller adverse trends between arms

1  
2  
3 were observed for MDASI, FAACT, HADS and BPI scales. These trends failed to reach  
4  
5 statistical significance. Overall mean survival was longer in IA (648 days) than in CA  
6  
7 (389 days,  $P=0.110$ ). QoL was predicted by symptom severity, symptom interference,  
8  
9 depression and anxiety.  
10

11  
12 **Conclusion:** Our data suggest a potentially favorable effect of an ePRO-based  
13  
14 intervention on QoL that needs to be reappraised in confirmatory studies.  
15

16  
17 **Trial registration:** ClinicalTrials.gov Identifier: NCT02204111.  
18  
19  
20  
21  
22  
23  
24  
25  
26  
27  
28  
29  
30  
31  
32  
33  
34  
35  
36  
37  
38  
39  
40  
41  
42  
43  
44  
45  
46  
47  
48  
49  
50  
51  
52  
53  
54  
55  
56  
57  
58  
59  
60

## STRENGTHS AND LIMITATIONS OF THIS STUDY

- YonLife explores the value and efficacy of a patient-directed intervention on quality of life (QoL) in sarcoma patients
- YonLife captures patient-reported outcomes (PRO) electronically and provides a tailored expert-derived intervention in a multi-center setting
- Effect sizes are now available for conducting confirmatory trials to examine the YonLife results

## KEYWORDS

Sarcoma, quality of life, patient-reported outcomes, trabectedin

## INTRODUCTION

The armamentarium of systemic treatment in advanced soft tissue sarcoma (STS) has evolved over the past decade. Yet, the burden of disease remains high and drug related adverse events are frequent<sup>1-3</sup>, even in patients who experience long lasting clinical benefit. Overall, quality of life (QoL) in sarcoma-patients is more impaired than in the general population<sup>2, 4</sup>, but comparable to patients with more frequent cancer diseases.<sup>5</sup> Mental health problems such as distress, depression and anxiety are as frequent as in other cancer patients.<sup>6, 7</sup>

Treatment algorithms for STS beyond first-line treatment do not show superiority between one regimen and another.<sup>8</sup> On the other hand, there are distinct and drug-specific side effects. Therefore, the choice of which regimen should be applied becomes a matter of debate within the patient-doctor consultation with considerations comprising preferences and personal beliefs.<sup>9</sup> Consequently, it is important to assess the treatment effectiveness in two ways. First, in terms of tumor burden as an outcome (e.g., progression-free survival or overall survival), and, secondly, in terms of symptoms and toxicities as assessed by patient-reported outcomes (PRO). As an individual might experience improvement in symptoms while a treatment is not superior on a group-level, appropriate strategies to evaluate the individual patient benefit need to be applied. Especially, if there is no superiority in survival, further outcomes should be considered, such as evaluation of minimal clinical important difference or the time to deterioration of QoL.<sup>10</sup>

Trabectedin (Yondelis<sup>®</sup>) is a semi-synthetic drug originally isolated from the sea squirt *Ecteinascidia turbinata* with a complex multimodal mechanism of action.<sup>11, 12</sup>

1  
2  
3 Trabectedin was the first marine-derived antineoplastic drug approved in 2007 in the  
4 European Union and in over 70 countries across the globe for the treatment of patients  
5 with advanced STS after failure of anthracyclines and ifosfamide, or who are unsuited to  
6 receive these agents.<sup>13</sup> In 2015, trabectedin was also approved in the United States  
7 based on a pivotal phase III trial, which demonstrated that trabectedin had a significantly  
8 longer PFS compared with dacarbazine in patients with advanced liposarcoma or  
9 leiomyosarcoma after failure of prior chemotherapy.<sup>14</sup> Noteworthy, an *ad hoc* analysis of  
10 the phase III trial, which compared inpatient with outpatient infusion of trabectedin,  
11 showed that safety, efficacy and PROs outcomes were comparable between both  
12 treatment settings.<sup>15</sup> In addition, an analysis of the MD Anderson Symptom Inventory  
13 (MDASI) PRO scores reported no clinically meaningful differences among patients  
14 reporting severe symptoms (MDASI score  $\geq 7$ ) who were treated with trabectedin in  
15 either an inpatient or outpatient treatment settings.<sup>15</sup>

16  
17 Assessment and interventions based on PRO have been proven to yield  
18 beneficial outcomes in various settings and entities.<sup>16-21</sup> For instance, Basch *et al* found  
19 benefits of their STAR (Symptom Tracking and Reporting) intervention in prolonging  
20 time on chemotherapy, less unexpected admission and longer quality-adjusted survival.  
21  
22 <sup>17</sup> In brief, they randomized 766 patients from a single institution under chemotherapy for  
23 solid tumors to either usual care or STAR. The intervention consisted of 12 different  
24 symptoms collected remotely, providing treating physicians with graphical  
25 representations of results and alerting nurses when a preset cut-off of worsening  
26 condition was met. Another randomized multi-center trial evaluated the effect of a web-  
27 based, self-report assessment and educational intervention on symptom distress during

1  
2  
3 cancer therapy in 752 ambulatory patients from different entities and with various  
4 diagnoses.<sup>18</sup> In this multicenter sample of participants they reported that Web-based  
5 patients-rated symptoms and communication coaching reduced symptom distress after  
6 active cancer treatment, particularly in those aged >50 years. Nevertheless, PRO  
7 assessment in patients treated for STS struggle with serious barriers such as a relatively  
8 small patient population and the fact that no STS-specific QoL- or symptom-  
9 questionnaires are available.<sup>4, 22</sup> Considering that merely assessing PRO might not be  
10 beneficial<sup>23</sup>, we believe it should be accompanied by additional interventions such as  
11 nurse-led patient education, self-care support or a multi-professional expert panel that  
12 discusses PRO-results and derive treatment recommendations.<sup>24</sup> Despite the increasing  
13 knowledge on benefits and assessment of PRO in general and the high symptom-  
14 burden of patients suffering from advanced STS, the proof of concept for such  
15 interventions remains open. Therefore, the cluster-randomized YonLife study was  
16 designed to evaluate the value and efficacy of a tailored, patient-directed palliative  
17 intervention based on various domains of QoL and to explore effect sizes using different  
18 PRO instruments in patients with advanced STS undergoing treatment with trabectedin.  
19  
20  
21  
22  
23  
24  
25  
26  
27  
28  
29  
30  
31  
32  
33  
34  
35  
36  
37  
38  
39  
40  
41  
42  
43  
44  
45  
46  
47  
48  
49  
50  
51  
52  
53  
54  
55  
56  
57  
58  
59  
60

## METHODS

### Patients

Adult patients ( $\geq 18$  years) suffering from advanced or metastatic STS who had received at least one dose of trabectedin  $1.5 \text{ mg/m}^2$ , given as a 24-hour intravenous infusion every three weeks, were included in this study. Physician-assessed life expectancy of patients had to be at least six months and Eastern Cooperative Oncology Group (ECOG)-performance status score had to be  $\leq 2$ . All study procedures were conducted in accordance with the ethical standards as laid down in the 1964 Declaration of Helsinki and its later amendments. The YonLife trial was approved by the Ethics Committee of the University Hospital Carl Gustav Carus in Dresden on June 2014 (EK241062014), and all participating centers obtained the approval of the local ethics committee before patient enrolment. All patients provided written informed consent before inclusion in the study.

### Patient and public involvement

We are grateful to all patients that participated in the YonLife trial. A member of the national sarcoma patient advocacy group “Das Lebenhaus” took part in the expert panel discussion.

### Trial design and objectives

Full details of YonLife trial (ClinicalTrials.gov Identifier: NCT02204111) have been reported.<sup>25</sup> Briefly, the YonLife trial was designed as a cluster-randomized, explorative, open-label, non-blinded, proof-of-concept study with the aim to compare the overall



1  
2  
3 QoL between patients with STS receiving a multidimensional intervention, on the  
4 basis of patients' individual PROs, and those patients receiving usual supportive  
5 treatment. Outcomes were assessed at baseline (i.e. visit [V] 1) and after 3 weeks (V2),  
6 6 (V3) and 9 (V4) weeks. Follow-up was conducted 21 (V5), 35 (V6) and 61 (V7) weeks  
7 after baseline. Primary objective was the explorative comparison of QoL-change after  
8 nine weeks (V4) between interventional arm and control arm. Secondary objectives  
9 included explorative comparison between other PRO such as anxiety, depression, pain  
10 as well as survival. Furthermore, factors that predict QoL after nine weeks were  
11 explored.  
12  
13  
14  
15  
16  
17  
18  
19  
20  
21  
22  
23  
24  
25

## 26 **Intervention**

27  
28 Patients in the control arm (CA) received only electronic PRO-assessment without  
29 feedback to the treatment team. Patients treated in the interventional arm (IA) received  
30 a comprehensive four-step evaluation comprising: 1) PRO were assessed electronically  
31 via handheld tablet-PCs at each visit; 2) a case vignette was created based on the  
32 obtained PRO and clinical data at baseline; 3) supportive care recommendations were  
33 consented during discussion on patients' vignettes in a multi-professional expert panel;  
34 and 4) these treatment-suggestions as well as graphical representation of obtained PRO  
35 were provided to the treating physicians prior to V2 in the interventional center.  
36 Clinicians in the IA had the opportunity to discuss the graphical presentation with their  
37 patients and initiate the treatment suggestions. The expert panel consisted of experts in  
38 the field of oncology, palliative care, social work, nursing, psycho-oncology as well as a  
39 patient advocate.  
40  
41  
42  
43  
44  
45  
46  
47  
48  
49  
50  
51  
52  
53  
54  
55  
56  
57  
58  
59  
60

## Randomization

Six German centers were cluster-randomized in a 1:1 ratio in an IA (3 centers) and a CA (3 centers). This trial was designed as a cluster-randomized trials to avoid contamination that might result in a type 2 error. If randomized on patient level, contamination might have been occurred as patients talked to each other about the recommendations or the treating physician transferred recommendations from one patient to another. Randomization was conducted by a colleague not actively involved in this trial using random numbers generated in excel.

The seventh center where the supportive care recommendations were created served as a reference center (RC). Patients treated at the RC received the same intervention as in the IA but were analyzed separately. The RC was invented in order to avoid bias from a dual role of participating clinicians as being part of treatment staff in the center and taking part in the expert panel at the same time. Furthermore, we initiated the RC at first center in order to get to know and solve any technical or logistical barriers in a mono-center setting before spreading it to a multi-center setting.

## Outcome measures

The primary outcome explored the changes of patients QoL in IA and CA after nine weeks of treatment as measured with the Functional Assessment for Cancer Therapy (FACT-G) total score. Nine weeks was set as time for primary outcome assessment since this period provides enough time to take action concerning interventional proposals. The FACT-G is a PRO measure used to assess health-related QoL in

patients undergoing cancer therapy as a total sum score (ranging from 0 to 108) comprising four subscales of QoL (physical, social, emotional, functional well-being).<sup>26</sup> Furthermore, we evaluated the number of patients with a clinical improvement between V1 and V4. This equals a change in the FACT-G total score of at least 3.3 points in order to represent a minimal clinically important difference (MCID). Additionally, the time until QoL deterioration (TUD) was also assessed as a change of at least 3.3 points between V1 and V4 as defined by King *et al.*<sup>27</sup> Analyses of long-term effects included the data collected from V1 until the end of the study at week 67 (V7). Visit schedule and outcomes of all secondary endpoints measured throughout the study are depicted in Table 1.

**Table 1: Visit schedule and outcomes**

| Study period                                                 | SCR      | Intervention phase |          |          | Follow up phase |           |           |
|--------------------------------------------------------------|----------|--------------------|----------|----------|-----------------|-----------|-----------|
|                                                              |          | 1                  | 2        | 3        | 4               | 5         | 6         |
| <b>Visit</b>                                                 | <b>1</b> | <b>2</b>           | <b>3</b> | <b>4</b> | <b>5</b>        | <b>6</b>  | <b>7</b>  |
| <b>Week (+/- 3 days)</b>                                     | <b>0</b> | <b>3</b>           | <b>6</b> | <b>9</b> |                 |           |           |
| <b>Week (+/- 1 week)</b>                                     |          |                    |          |          | <b>21</b>       | <b>35</b> | <b>61</b> |
| Concomitant medication                                       | x        | x                  | x        | x        | x               | x         | x         |
| FACT-G                                                       | x        | x                  | x        | x        | x               | x         | x         |
| MDASI                                                        | x        | x                  | x        | x        | x               | x         | x         |
| FAACT                                                        | x        |                    |          | x        | x               | x         | x         |
| BPI                                                          | x        |                    |          | x        | x               | x         | x         |
| IN-PATSAT32*                                                 | x        |                    |          | x        | x               | x         | x         |
| HADS                                                         | x        |                    |          | x        | x               | x         | x         |
| Tumor-specific & socio-demographic parameters                | x        |                    |          | x        | x               | x         | x         |
| Feasibility Scoring based on patients' and doctors' opinion* |          |                    |          | x        |                 |           |           |

\* Data is currently being analyzed and is available upon request.

Secondary outcomes included the subscales of the FACT-G questionnaire: physical (range: 0-28), emotional (range: 0-24), functional (range: 0-28), and social well-being (range: 0-28) explored at V4 and during follow up (i.e. V7).<sup>24</sup> Moreover, the effect size of the intervention was measured as COHEN'S *d* test by measuring the difference between

1  
2  
3 two means.<sup>28</sup> The M.D. Anderson Symptom Inventory (MDASI) was used to measure  
4 the severity of 13 cancer-related symptoms and their impact on six dimensions of daily  
5 life.<sup>29</sup> Psychological distress was evaluated by the Hospital Anxiety and Depression  
6 scale (HADS).<sup>30</sup> It provided a total sum score (range: 0-42) and two self-rating subscales  
7 for anxiety and depression (range: 0-21). HADS also identified clinically relevant cases  
8 of anxiety and depression using pre-determined cut-off scores.<sup>31</sup> The Functional  
9 Assessment of Anorexia/Cachexia Therapy questionnaire (FAACT) measured the  
10 impact of cachexia and anorexia on patients' QoL.<sup>32</sup> Finally, the Brief Pain Inventory  
11 (BPI) in a scale range from 0-10 measured the intensity of pain and pain-related  
12 interference. <sup>33</sup> We assessed the predictive value of the following variables at V1 for  
13 QoL: gender, age, performance status (ECOG), tumor stage (UICC-classification),  
14 symptom severity (MDASI), symptom interference (MDASI), depression (HADS), anxiety  
15 (HADS), patients satisfaction (IN-PATSAT32)<sup>34</sup>, anorexia/cachexia (FAACT).  
16  
17  
18  
19  
20  
21  
22  
23  
24  
25  
26  
27  
28  
29  
30  
31  
32  
33  
34

### 35 **Statistical considerations**

36  
37 The patients sample size was calculated for an explorative purpose. We assumed the  
38 superiority of our intervention concerning FACT-G total score. Type I error was set to  
39  $\alpha=0.05$  (one-sided), with a statistical power of  $1-\beta=0.80$  and a medium effect<sup>27</sup> between  
40 the groups in FACT-G=15, with an estimated standard deviation (SD) of  $\sigma=17$  and a  
41 conservatively estimated intra-cluster-correlation coefficient of  $P=0.1$ .<sup>35</sup> This calculation  
42 resulted in a cluster size of 11 patients. Additionally, 11 patients were recruited in the  
43 reference center, for a total of 77 patients.  
44  
45  
46  
47  
48  
49  
50  
51  
52

53 The Full Analysis Set (FAS) comprised all patients included in the study and  
54  
55

1  
2  
3 allocated to a treatment group irrespective of their compliance with the planned course  
4 of treatment (intention-to-treat principle). Analyses of efficacy endpoints were performed  
5 on the per-protocol analysis set (PPS) defined as the subset of patients of the FAS who  
6 have provided complete data at the first (V1) and last visit (V4) and who had no major  
7 protocol deviations.  
8  
9  
10  
11  
12  
13

14 Survival was assessed as means of PFS and overall survival (OS). The PFS and  
15 OS analyses were defined as the time interval from the first administration of trabectedin  
16 to the earliest date of disease progression or death, regardless of cause (whichever  
17 occurred first) for PFS, whereas OS was defined as the time between the start of  
18 trabectedin and patient death from any cause. Patients were censored after the  
19 discontinuation of their study participation. Means of PFS and OS are reported to  
20 provide the ability to describe and compare the arms, as median value of OS is not  
21 defined for confidence interval (CI) within the observation period of this study. Mann-  
22 Whitney-U, Fisher-exact test, and Chi-squared test were used for the detection of  
23 possible differences concerning demographics. T-test was applied to detect possible  
24 differences between metric outcomes, whereas linear univariate and multivariate  
25 regression were calculated to identify determinants of QoL at V4.  
26  
27  
28  
29  
30  
31  
32  
33  
34  
35  
36  
37  
38  
39  
40  
41  
42  
43  
44  
45  
46  
47  
48  
49  
50  
51  
52  
53  
54  
55  
56  
57  
58  
59  
60

## RESULTS

### Patients and treatment arms

Between September 2014 and March 2018, 80 patients from seven sites were screened for study participation (figure 1). The FAS encompasses 79 patients, as one patient had to be excluded from analysis due to protocol violation. In the FAS, mean age was 58 years (range: 22-86). Leiomyosarcoma ( $n=32$ ) and liposarcoma ( $n=23$ ) were the most prevalent histological type of sarcomas. At baseline, the IA included 38 patients (19 of whom included in PPS), while CA consists of 29 patients (14 of whom included in PPS). No difference concerning age, gender and the number of previous cycles of trabectedin was observed between the arms. In the CA more patients had a higher tumor stage ( $P=0.083$ ) and less patients suffer from leiomyosarcoma (Table 2).

**Table 2. Patient characteristic at baseline**

|                                | Interventional arm (IA; 3 centers)<br><i>N</i> =38 | Control arm (CA; 3 centers)<br><i>N</i> =29 | Reference Center (RF; 1 center)<br><i>N</i> =12 | Full Analysis Set<br><i>N</i> =79 |
|--------------------------------|----------------------------------------------------|---------------------------------------------|-------------------------------------------------|-----------------------------------|
| <b>Full Analysis Set (FAS)</b> |                                                    |                                             |                                                 |                                   |
| <b>Gender</b>                  |                                                    |                                             |                                                 |                                   |
| Male                           | 20                                                 | 15                                          | 6                                               | 41                                |
| Female                         | 18                                                 | 14                                          | 6                                               | 38                                |
| <b>Age</b>                     |                                                    |                                             |                                                 |                                   |
| Mean (SD)                      | 58 (12)                                            | 56 (15)                                     | 63 (16)                                         | 58 (14)                           |
| Range (years)                  | 38-87                                              | 22-80                                       | 34-82                                           | 22-87                             |
| <b>Tumor histology</b>         |                                                    |                                             |                                                 |                                   |
| Leiomyosarcoma                 | 19                                                 | 5                                           | 5                                               | 29                                |
| Liposarcoma                    | 6                                                  | 11                                          | 3                                               | 20                                |
| Others*                        | 13                                                 | 12                                          | 4                                               | 29                                |
| missing                        | 0                                                  | 1                                           | 0                                               | 1                                 |
| <b>Metastatic disease</b>      |                                                    |                                             |                                                 |                                   |
| M0                             | 16                                                 | 11                                          | 5                                               | 32                                |
| M1                             | 12                                                 | 16                                          | 7                                               | 35                                |
| missing                        | 10                                                 | 2                                           | 0                                               | 12                                |
| <b>ECOG PS</b>                 |                                                    |                                             |                                                 |                                   |
| 0                              | 20                                                 | 14                                          | 5                                               | 39                                |
| 1                              | 15                                                 | 13                                          | 7                                               | 35                                |
| 2                              | 3                                                  | 0                                           | 0                                               | 3                                 |

|                                                          |                                                     |                                              |                                                 |                                  |
|----------------------------------------------------------|-----------------------------------------------------|----------------------------------------------|-------------------------------------------------|----------------------------------|
| <b>Missing</b>                                           | 0                                                   | 2                                            | 0                                               | 2                                |
| <b>Number of previous cycles of trabectedin</b>          |                                                     |                                              |                                                 |                                  |
| <b>Median</b>                                            | 0                                                   | 1                                            | 1                                               | 1                                |
| <b>Range</b>                                             | 0-15                                                | 0-17                                         | 0-11                                            | 0-17                             |
| <b>Number of previous cycles of another chemotherapy</b> |                                                     |                                              |                                                 |                                  |
| <b>Median</b>                                            | 1.5                                                 | 1                                            | 2                                               | 2                                |
| <b>Range</b>                                             | 0-6                                                 | 0-5                                          | 1-4                                             | 0-6                              |
| <b>Number of previous lines of another chemotherapy</b>  |                                                     |                                              |                                                 |                                  |
| <b>Median</b>                                            | 2.5                                                 | 2.5                                          | 3                                               | 2                                |
| <b>Range</b>                                             | 0-6                                                 | 0-6                                          | 2-5                                             | 0-6                              |
| <b>Per-protocol analysis set (PPS)</b>                   |                                                     |                                              |                                                 |                                  |
|                                                          | <b>Interventional arm (IA; 3 centers),<br/>N=19</b> | <b>Control arm (CA; 3 centers),<br/>N=14</b> | <b>Reference Center (RF; 1 center),<br/>N=8</b> | <b>Per Protocol Set<br/>N=41</b> |
| <b>Gender</b>                                            |                                                     |                                              |                                                 |                                  |
| <b>Male</b>                                              | 8                                                   | 6                                            | 3                                               | 17                               |
| <b>Female</b>                                            | 11                                                  | 8                                            | 5                                               | 24                               |
| <b>Age</b>                                               |                                                     |                                              |                                                 |                                  |
| <b>Mean (SD)</b>                                         | 61 (12)                                             | 55 (15)                                      | 59 (17)                                         | 58 (14)                          |
| <b>Range (years)</b>                                     | 44-87                                               | 30-80                                        | 34-82                                           | 30-87                            |
| <b>Tumor histology</b>                                   |                                                     |                                              |                                                 |                                  |
| <b>Leiomyosarcoma</b>                                    | 5                                                   | 6                                            | 4                                               | 15                               |
| <b>Liposarcoma</b>                                       | 11                                                  | 1                                            | 3                                               | 15                               |
| <b>Others*</b>                                           | 3                                                   | 7                                            | 1                                               | 11                               |
| <b>missing</b>                                           | 0                                                   | 0                                            | 0                                               | 0                                |
| <b>Metastatic disease</b>                                |                                                     |                                              |                                                 |                                  |
| <b>M0</b>                                                | 8                                                   | 5                                            | 2                                               | 15                               |
| <b>M1</b>                                                | 5                                                   | 9                                            | 6                                               | 20                               |
| <b>missing</b>                                           | 6                                                   | 0                                            | 0                                               | 6                                |
| <b>ECOG PS</b>                                           |                                                     |                                              |                                                 |                                  |
| <b>0</b>                                                 | 12                                                  | 8                                            | 4                                               | 24                               |
| <b>1</b>                                                 | 6                                                   | 6                                            | 4                                               | 16                               |
| <b>2</b>                                                 | 1                                                   | 0                                            | 0                                               | 1                                |
| <b>Missing</b>                                           | 0                                                   | 0                                            | 0                                               | 0                                |
| <b>Number of previous cycles of trabectedin</b>          |                                                     |                                              |                                                 |                                  |
| <b>Median</b>                                            | 0                                                   | 1                                            | 1                                               | 1                                |
| <b>Range</b>                                             | 0-15                                                | 0-7                                          | 1-11                                            | 0-15                             |
| <b>Number of previous cycles of another chemotherapy</b> |                                                     |                                              |                                                 |                                  |
| <b>Median</b>                                            | 1                                                   | 1                                            | 2                                               | 2                                |
| <b>Range</b>                                             | 0-4                                                 | 0-3                                          | 2-4                                             | 0-4                              |

\*All subtypes occurring less than four times were merged into this category.

ECOG PS, Eastern Cooperative Oncology Group performance status; SD, standard deviation; M0, no distant metastasis; M1, distant metastasis.

## Primary Outcome

After nine weeks at V4, FACT-G declined less in IA ( $\Delta$  FACT-G total score: -2.4, 95% CI: -9.2-4.5) as compared to the CA ( $\Delta$  FACT-G total score: -3.9, 95% CI: -11.3-3.5;  $P=0.765$ ) (Table 3). The effect size of the intervention on the FACT-G score was  $d=0.269$  (small effect). Intra-cluster correlation was 0. Figure 2 and Supplementary Table 1 depicts absolute FACT-scores trajectories over time. The number of patients experiencing a MCID was equal in both groups (IA: 44% and CA: 43%). The median TUD differed slightly between IA (25 days, 95% CI: 6.2-43.8) and CA (22 days, 95% CI: 16.5-27.5;  $P=0.927$ ).

**Table 3. Change scores after 9 weeks of treatment**

|                                     | Mean change from baseline (V1) to 9 weeks (V4) |          |    |             |           |    | <i>P</i> -value | Interventional trend |
|-------------------------------------|------------------------------------------------|----------|----|-------------|-----------|----|-----------------|----------------------|
|                                     | Interventional arm                             |          |    | Control arm |           |    |                 |                      |
|                                     | mean                                           | 95% CI   | N  | mean        | 95% CI    | N  |                 |                      |
| <b>FACT-G total</b>                 | -2.4                                           | -9.2-4.5 | 18 | -3.9        | -11.3-3.5 | 14 | 0.765           | Beneficial           |
| <b>FACT-G physical well-being</b>   | -1.2                                           | -4.4-2.1 | 18 | -2.2        | -5.4-1.0  | 14 | 0.722           | Beneficial           |
| <b>FACT-G social well-being</b>     | -1.6                                           | -3.1-0.1 | 18 | -0.3        | -2.2-1.7  | 14 | 0.193           | Adverse              |
| <b>FACT-G emotional well-being</b>  | 0.9                                            | -0.6-2.4 | 18 | -0.1        | -2.3-2.1  | 14 | 0.561           | Beneficial           |
| <b>FACT-G functional well-being</b> | -0.5                                           | -2.7-1.7 | 18 | -1.3        | -4.0-1.4  | 14 | 0.536           | Beneficial           |
| <b>HADS depression</b>              | 0.3                                            | -0.6-1.2 | 18 | 0.2         | -2.1-2.5  | 14 | 0.419           | Equivalent           |
| <b>HADS anxiety</b>                 | 0.3                                            | -1.7-2.2 | 18 | -0.8        | -3.0-1.4  | 14 | 0.710           | Adverse              |
| <b>BPI average pain</b>             | 0.6                                            | -0.3-1.5 | 19 | 0.2         | -0.5-1.0  | 14 | 0.788           | Adverse              |
| <b>BPI pain interference</b>        | 0.4                                            | -0.3-1.1 | 18 | 0.1         | -0.5-0.7  | 13 | 0.679           | Adverse              |
| <b>MDASI symptom severity</b>       | 0.7                                            | -0.1-1.4 | 18 | 0.2         | -0.4-0.8  | 14 | 0.442           | Adverse              |
| <b>MDASI symptom interference</b>   | 1.2                                            | 0.9-1.6  | 18 | 0.8         | -0.4-1.9  | 13 | 0.667           | Adverse              |

BPI. Brief Pain Inventory; CI, confidence interval; FACT-G. Functional Assessment for Cancer Therapy; HADS. Hospital Anxiety and Depression scale; MDASI. The M.D. Anderson Symptom Inventory; V. visit; N. number of evaluable patients in respective cluster.



## Secondary Outcomes

Regarding the change of QoL between V1 and V4 (as well as during follow up V7), there was a beneficial impact of the patient-tailored intervention in IA in all FACT-G subscales except for social well-being (Figure 2). There was less decline in physical well-being subscale in IA ( $\Delta$  FACT-G PWB: -1.2, 95% CI: -4.4-2.1) than in CA ( $\Delta$  FACT-G PWB: -2.2, 95% CI: -5.4-1.0;  $P=0.926$ ). Emotional well-being subscale improved slightly in IA ( $\Delta$  FACT-G EWB: 0.9, 95% CI: -0.6-2.4) and remained almost stable in CA ( $\Delta$  FACT-G EWB: -0.1, 95% CI: -2.3-2.1;  $P=0.561$ ). Functional well-being subscale declined less in IA ( $\Delta$  FACT-G FWB: -0.5, 95% CI: -2.7-1.7) than in CA ( $\Delta$  FACT-G FWB: -1.3, 95% CI: -4.0-1.4;  $P=0.536$ ). Lastly, social well-being subscale remained almost stable ( $\Delta$  FACT-G SWB: -0.2, 95% CI: -3.1 -0.1) in CA while decreasing in IA ( $\Delta$  FACT-G SWB: -1.6, 95% CI: -2.2-1.7;  $P=0.952$ ). Overall, there were non-significant, adverse trends in other domains of PRO (MDASI, FAACT, HADS and BPI scales) (Table 3 and Supplementary Table 2).

Overall mean OS was longer in IA than in CA (648 vs. 389 days) without reaching statistical significance ( $P=0.110$ ), while means of PFS were almost identical in IA and CA (249 vs. 232 days;  $P=0.899$ ).

## QoL-Prediction

Univariate regressions revealed that each of the following variables determined the FACT-G total score: symptom severity, symptom interference, depression and anxiety. No influence on the FACT-G total score was found for age, gender, ECOG performance status, patient-satisfaction, anorexia and cachexia (Table 4). In a multivariable

regression, depression determines the FACT-G total score (Table 4).

**Table 4. Univariate and multiple regression of FACT-G total score after nine weeks (V4) on parameters measured at baseline (V1) over all groups**

| <b>Univariate regression</b> |                 |          |                         |
|------------------------------|-----------------|----------|-------------------------|
|                              | <i>P</i> -value | estimate | 95% confidence interval |
| <b>Gender</b>                | 0.154           | 7.5      | -2.8 to 17.8            |
| <b>Age</b>                   | 0.228           | -0.2     | -0.5 to 0.1             |
| <b>ECOG PS</b>               | 0.509           | -3.2     | -12.7 to 6.3            |
| <b>Tumor stage</b>           | 0.284           | -1.8     | -5.1 to 1.5             |
| <b>Symptom severity</b>      | 0.0             | -6.6     | -10.5 to -2.7           |
| <b>Symptom interference</b>  | 0.011           | -3.4     | -6.0 to -0.8            |
| <b>Depression</b>            | 0.0             | -2.7     | -4.3 to -1.1            |
| <b>Anxiety</b>               | 0.034           | -1.4     | -2.7 to -0.1            |
| <b>Patient Satisfaction</b>  | 0.451           | 3.0      | -4.8 to 10.8            |
| <b>Anorexia/Cachexia</b>     | 0.143           | 0.8      | -0.3 to 1.9             |
| <b>Multiple regression</b>   |                 |          |                         |
|                              | <i>P</i> -value | estimate | 95% confidence interval |
| <b>Gender</b>                | 0.844           | 1.0      | -7.2 to 9.4             |
| <b>Age</b>                   | 0.103           | -0.3     | -0.6 to 0.1             |
| <b>ECOG PS</b>               | 0.746           | 1.5      | -6.1 to 9.1             |
| <b>Tumor stage</b>           | 0.586           | -0.8     | -3.4 to 1.7             |
| <b>Symptom severity</b>      | 0.079           | -4.4     | -8.3 to -0.2            |
| <b>Symptom interference</b>  | 0.744           | 0.5      | -1.8 to 2.8             |
| <b>Depression</b>            | 0.025           | -2.2     | -3.9 to -0.7            |
| <b>Anxiety</b>               | 0.869           | -0.1     | -1.5 to 1.3             |
| <b>Patient Satisfaction</b>  | 0.437           | -0.1     | -0.4 to 0.1             |
| <b>Anorexia/Cachexia</b>     | 0.161           | -0.9     | -2.0 to 0.2             |

ECOG PS, Eastern Cooperative Oncology Group performance status.

## DISCUSSION

### Principal findings

To the best of our knowledge, this is the first randomized trial using a patient-directed supportive care intervention to improve QoL and other PRO in sarcoma patients. We observed a trend in favor of the intervention considering the primary endpoint (total FACT-G score) and other secondary outcomes (i.e. physical, functional and emotional well-being QoL subscales). On the other side, MCID and TUD assessments slightly differed between the arms. Not surprisingly and due to the character of palliative disease, absolute numbers in FACT-G-score decline over time. This change is well in line with findings from a multi-center randomized trial, which reported a comparable decline in FACT-G score of ~2 in 281 patients suffering from advanced solid cancers who received early palliative care or standard oncologic care.<sup>36</sup> In addition, the total FACT-G score they observed after twelve weeks (70.1 and 69.6) was comparable to the score found in IA (73.9) and CA (69.4) after nine week of treatment. The total FACT-G score (76.4) was also comparable to the YonLife baseline score (74.2) in a sample of 42 patients suffering from different sarcoma histotypes in a single center, cross-sectional study.<sup>37</sup>

As the intervention appears to be favorable on QoL (without reaching statistical significance), it seemed adverse on symptom domains such as average pain, as well as anxiety and depression. For the former, the applied intervention might not have been timely enough, as adequate pain management needs immediate action instead of recommendation that take several days. Complex syndromes such as anxiety and depression need ongoing treatment, either psycho-oncological or pharmaceutical, which

1  
2  
3 usually take more time to be effective.  
4  
5  
6

### 7 **YonLife-intervention - unanswered questions and future research**

8  
9  
10 There are still many unanswered questions regarding comprehensive QoL interventions.  
11  
12 During the past years, several reports with different interventions tried to shed some  
13  
14 more light on this issue. The YonLife intervention incorporates aspects of other  
15  
16 programs like providing treating physician with pre-collected PROs<sup>17, 24</sup> and, creating a  
17  
18 QoL-profile and using expert's recommendations.<sup>19</sup> In contrast, unlike recently evolving  
19  
20 programs<sup>38</sup>, YonLife did not provide possibility to answer questions using web based  
21  
22 questionnaires accessible from home or mobile device. Furthermore, the PRO-results  
23  
24 were automatically calculated, but were not automatically compared to pre-defined cut-  
25  
26 off or norm data nor were they available in the clinic information system like in other  
27  
28 projects.<sup>39, 40</sup> Thus, the described YonLife intervention needed human support to create  
29  
30 the case vignette that limits the application to busy clinical routine. Advancing technical  
31  
32 opportunities could help overcoming these barriers. YonLife also provided  
33  
34 recommendations thoroughly based on electronic capturing of PRO. Yet, it  
35  
36 demonstrated to be beneficial on QoL in contrast to a palliative intervention based on  
37  
38 the personal encounter.<sup>36</sup> This could be even more relevant in a rare disease such as  
39  
40 sarcoma care, where patients regularly travel long distances to specialized sarcoma  
41  
42 centers.  
43  
44  
45  
46  
47  
48  
49  
50

### 51 **Weaknesses and strengths**

52  
53 Our study has several limitations. As no preceding studies that incorporate a PRO-  
54  
55

1  
2  
3 based individualized intervention existed, our study design and the sample size were set  
4  
5 only for an explorative purpose. Therefore, results were determined to fail statistical  
6  
7 significance and should be interpreted with caution. Furthermore, sarcoma-specific QoL  
8  
9 or symptom-measures are still missing, while the FACT-G and MDASI are generic  
10  
11 instruments, which might not cover syndromes and aspects specific for sarcoma  
12  
13 patients. On the other hand, to overcome the obstacles of limited statistical power, we  
14  
15 applied measures of clinical rather than statistical importance such as the MCID or TUD,  
16  
17 which might be even more important to clinicians in daily practice. Effect sizes are now  
18  
19 available for calculating sample sizes in a larger confirmatory trial.  
20  
21  
22

23  
24 In conclusion, the YonLife trial adds essential knowledge to the scarce data on  
25  
26 PRO in patients with advanced STS. Unlike previous work, it is the first trial that applies  
27  
28 an electronic PRO-assessment and a remote tailored intervention of patients with STS.  
29  
30 Our data suggest that incorporation of validated QoL measures in STS clinical treatment  
31  
32 may further improve the care and understanding of patient wellbeing beyond traditional  
33  
34 clinical measures. Additionally, beyond proving the statistical significance of clinically  
35  
36 important effects, this study is an important prerequisite for future research and holistic  
37  
38 care of patients with advanced STS.  
39  
40  
41  
42  
43  
44  
45  
46  
47  
48  
49  
50  
51  
52  
53  
54  
55  
56  
57  
58  
59  
60

## CONTRIBUTORS

LH and MKS proposed the conception and design of the study, performed data analysis, interpretation and quality control of data and algorithms. MB, LH and MKS are responsible for the manuscript editing. MKS, SR, HGK, BK, AK, VG, TK, UP and JMC performed the data acquisition. All aforementioned authors as well as US, JF, AS, BH and KA participated in the manuscript drafting and review with equal contribution.

## FUNDING

This work was supported by an unrestricted grant from PharmaMar, Spain.

## DATA AVAILABILITY STATEMENT

Complete data sets are available upon reasonable request

## COMPETING INTERESTS

None declared.

## ACKNOWLEDGEMENTS

The trial was coordinated by GWT-TUD, Dresden, Germany. We acknowledge the German Interdisciplinary Sarcoma Group (GISG) for providing support for this trial. The YonLife trial was associated with the German Interdisciplinary Sarcoma Group as GISG-12 project and as AIO-STS-0215 within the 'Arbeitsgemeinschaft Internistische Onkologie' of the 'Deutsche Krebsgesellschaft' (DKG). We would also like to thank Michael Kramer, Kristian Zinke and Rocco Haase for their support on statistical aspects

1  
2  
3  
4  
5  
6  
7  
8  
9  
10  
11  
12  
13  
14  
15  
16  
17  
18  
19  
20  
21  
22  
23  
24  
25  
26  
27  
28  
29  
30  
31  
32  
33  
34  
35  
36  
37  
38  
39  
40  
41  
42  
43  
44  
45  
46  
47  
48  
49  
50  
51  
52  
53  
54  
55  
56  
57  
58  
59  
60

of the study and Felicitas Lenz and Adnan Tanović for proof-reading.

For peer review only

## REFERENCES

1. Gough, N.J., et al., *Symptom burden, survival and palliative care in advanced soft tissue sarcoma*. *Sarcoma*, 2011. **2011**: p. 325189.
2. Reichardt, P., et al., *Quality of Life and Utility in Patients with Metastatic Soft Tissue and Bone Sarcoma: The Sarcoma Treatment and Burden of Illness in North America and Europe (SABINE) Study*. *Sarcoma*, 2012. **2012**: p. 740279.
3. Storey, L., et al., *A Critical Review of the Impact of Sarcoma on Psychosocial Wellbeing*. *Sarcoma*, 2019. **2019**: p. 9730867.
4. McDonough, J., et al., *Health-related quality of life, psychosocial functioning, and unmet health needs in patients with sarcoma: A systematic review*. *Psychooncology*, 2019. **28**(4): p. 653-664.
5. Ostacoli, L., et al., *Quality of life, anxiety and depression in soft tissue sarcomas as compared to more common tumours: an observational study*. *Appl. Res. Qual. Life*, 2014. **9**(1): p. 123-131.
6. Tang, M.H., et al., *A systematic review of the recent quality of life studies in adult extremity sarcoma survivors*. *Sarcoma*, 2012. **2012**: p. 171342.
7. Paredes, T., et al., *Quality of life of sarcoma patients from diagnosis to treatments: predictors and longitudinal trajectories*. *Eur J Oncol Nurs*, 2011. **15**(5): p. 492-9.
8. Casali, P.G., et al., *Soft tissue and visceral sarcomas: ESMO-EURACAN Clinical Practice Guidelines for diagnosis, treatment and follow-up*. *Ann Oncol*, 2018. **29**(Supplement\_4): p. iv268-iv269.



- 1  
2  
3 9. Blay, J.Y., et al., *International expert opinion on patient-tailored management of*  
4 *soft tissue sarcomas*. Eur J Cancer, 2014. **50**(4): p. 679-89.
- 5  
6  
7  
8 10. Bonnetain, F., et al., *Time until definitive quality of life score deterioration as a*  
9 *means of longitudinal analysis for treatment trials in patients with metastatic*  
10 *pancreatic adenocarcinoma*. Eur J Cancer, 2010. **46**(15): p. 2753-62.
- 11  
12  
13  
14 11. D'Incalci, M., et al., *Unique features of the mode of action of ET-743*. Oncologist,  
15 2002. **7**(3): p. 210-6.
- 16  
17  
18  
19 12. Larsen, A.K., C.M. Galmarini, and M. D'Incalci, *Unique features of trabectedin*  
20 *mechanism of action*. Cancer Chemother Pharmacol, 2016. **77**(4): p. 663-71.
- 21  
22  
23  
24 13. Demetri, G.D., et al., *Efficacy and safety of trabectedin in patients with advanced*  
25 *or metastatic liposarcoma or leiomyosarcoma after failure of prior anthracyclines*  
26 *and ifosfamide: results of a randomized phase II study of two different schedules*.  
27 J Clin Oncol, 2009. **27**(25): p. 4188-96.
- 28  
29  
30  
31  
32  
33 14. Demetri, G.D., et al., *Efficacy and safety of trabectedin or dacarbazine for*  
34 *metastatic liposarcoma or leiomyosarcoma after failure of conventional*  
35 *chemotherapy: results of a phase III randomized multicenter clinical trial*. J Clin  
36 Oncol, 2016. **34**(8): p. 786-93.
- 37  
38  
39  
40  
41  
42 15. Jones, R.L., et al., *Safety and efficacy of trabectedin when administered in the*  
43 *inpatient versus outpatient setting: Clinical considerations for outpatient*  
44 *administration of trabectedin*. Cancer, 2019. **125**(24): p. 4435-4441.
- 45  
46  
47  
48  
49 16. Basch, E., et al., *Overall Survival Results of a Trial Assessing Patient-Reported*  
50 *Outcomes for Symptom Monitoring During Routine Cancer Treatment*. JAMA,  
51 2017. **318**(2): p. 197-198.
- 52  
53  
54  
55

17. Basch, E., et al., *Symptom Monitoring With Patient-Reported Outcomes During Routine Cancer Treatment: A Randomized Controlled Trial*. J Clin Oncol, 2016. **34**(6): p. 557-65.
18. Berry, D.L., et al., *Electronic self-report assessment for cancer and self-care support: results of a multicenter randomized trial*. J Clin Oncol, 2014. **32**(3): p. 199-205.
19. Klinkhammer-Schalke, M., et al., *Direct improvement of quality of life using a tailored quality of life diagnosis and therapy pathway: randomised trial in 200 women with breast cancer*. Br J Cancer, 2012. **106**(5): p. 826-38.
20. Ruland, C.M., et al., *Effects of a computerized system to support shared decision making in symptom management of cancer patients: preliminary results*. J Am Med Inform Assoc, 2003. **10**(6): p. 573-9.
21. Yount, S.E., et al., *A randomized trial of weekly symptom telemonitoring in advanced lung cancer*. J Pain Symptom Manage, 2014. **47**(6): p. 973-89.
22. Winnette, R., et al., *The Patient Experience with Soft Tissue Sarcoma: A Systematic Review of the Literature*. Patient, 2017. **10**(2): p. 153-162.
23. Velikova, G., et al., *Measuring quality of life in routine oncology practice improves communication and patient well-being: a randomized controlled trial*. J Clin Oncol, 2004. **22**(4): p. 714-24.
24. Strasser, F., et al., *The effect of real-time electronic monitoring of patient-reported symptoms and clinical syndromes in outpatient workflow of medical oncologists: E-MOSAIC, a multicenter cluster-randomized phase III study (SAKK 95/06)*. Ann Oncol, 2016. **27**(2): p. 324-32.

- 1  
2  
3 25. Schuler, M., et al., *A cluster-randomised, controlled proof-of-concept study to*  
4 *explore the feasibility and effect of a patient-directed intervention on quality of life*  
5 *in patients with advanced soft tissue sarcoma.* BMJ Open, 2017. **7**(6): p.  
6 e014614.  
7
- 8  
9  
10  
11  
12 26. Cella, D.F., et al., *The Functional Assessment of Cancer Therapy scale:*  
13 *development and validation of the general measure.* J Clin Oncol, 1993. **11**(3): p.  
14 570-9.  
15  
16  
17  
18
- 19 27. King, M.T., et al., *Meta-analysis provides evidence-based interpretation*  
20 *guidelines for the clinical significance of mean differences for the FACT-G, a*  
21 *cancer-specific quality of life questionnaire.* Patient Relat Outcome Meas, 2010.  
22 **1**: p. 119-26.  
23  
24  
25  
26  
27
- 28 28. Cohen, J., *Statistical Power for the Behavioral Sciences (2<sup>nd</sup> Edition).* Lawrence  
29 Erlbaum Associates, 1988.  
30  
31  
32
- 33 29. Cleeland, C.S., et al., *Assessing symptom distress in cancer patients: the M.D.*  
34 *Anderson Symptom Inventory.* Cancer, 2000. **89**(7): p. 1634-46.  
35  
36  
37
- 38 30. Zigmond, A.S. and R.P. Snaith, *The hospital anxiety and depression scale.* Acta  
39 Psychiatr Scand, 1983. **67**(6): p. 361-70.  
40  
41
- 42 31. Singer, S., et al., *Hospital anxiety and depression scale cutoff scores for cancer*  
43 *patients in acute care.* Br J Cancer, 2009. **100**(6): p. 908-12.  
44  
45  
46
- 47 32. Ribaldo, J.M., et al., *Re-validation and shortening of the Functional Assessment*  
48 *of Anorexia/Cachexia Therapy (FAACT) questionnaire.* Qual Life Res, 2000.  
49 **9**(10): p. 1137-46.  
50  
51  
52  
53  
54  
55  
56  
57  
58  
59  
60

- 1  
2  
3 33. Radbruch, L., et al., *Validation of the German version of the Brief Pain Inventory*.  
4  
5 J Pain Symptom Manage, 1999. **18**(3): p. 180-7.  
6  
7  
8 34. Bredart, A., et al., *An international prospective study of the EORTC cancer in-*  
9  
10 *patient satisfaction with care measure (EORTC IN-PATSAT32)*. Eur J Cancer,  
11  
12 2005. **41**(14): p. 2120-31.  
13  
14  
15 35. Brucker, P.S., et al., *General population and cancer patient norms for the*  
16  
17 *Functional Assessment of Cancer Therapy-General (FACT-G)*. Eval Health Prof,  
18  
19 2005. **28**(2): p. 192-211.  
20  
21  
22 36. Franciosi, V., et al., *Early palliative care and quality of life of advanced cancer*  
23  
24 *patients-a multicenter randomized clinical trial*. Ann Palliat Med, 2019. **8**(4): p.  
25  
26 381-389.  
27  
28  
29 37. Chan, A., et al., *Symptom burden and medication use in adult sarcoma patients*.  
30  
31 Support Care Cancer, 2015. **23**(6): p. 1709-17.  
32  
33  
34 38. Warrington, L., et al., *Online tool for monitoring adverse events in patients with*  
35  
36 *cancer during treatment (eRAPID): field testing in a clinical setting*. BMJ Open,  
37  
38 2019. **9**(1): p. e025185.  
39  
40  
41 39. Schuler, M.K., et al., *Implementation of a mobile inpatient quality of life (QoL)*  
42  
43 *assessment for oncology nursing*. Support Care Cancer, 2016. **24**(8): p. 3391-9.  
44  
45  
46 40. Schuler, M., et al., *Implementation and first results of a tablet-based assessment*  
47  
48 *referring to patient-reported outcomes in an inpatient cancer care unit*. Z Evid  
49  
50 Fortbild Qual Gesundheitswes, 2017. **121**: p. 64-72.  
51  
52  
53  
54  
55  
56  
57  
58  
59  
60

1  
2  
3 **Figure captions**  
4  
5  
6

7 **Figure 1.** CONSORT Flowchart  
8  
9

10  
11  
12 **Figure 2.** Absolute FACT-scores at baseline (V1), after nine weeks of treatment (V4;  
13  
14 primary endpoint) and during follow up visit (V7)  
15  
16  
17  
18  
19  
20  
21  
22  
23  
24  
25  
26  
27  
28  
29  
30  
31  
32  
33  
34  
35  
36  
37  
38  
39  
40  
41  
42  
43  
44  
45  
46  
47  
48  
49  
50  
51  
52  
53  
54  
55  
56  
57  
58  
59  
60

For peer review only

Figure 1. CONSORT Flowchart

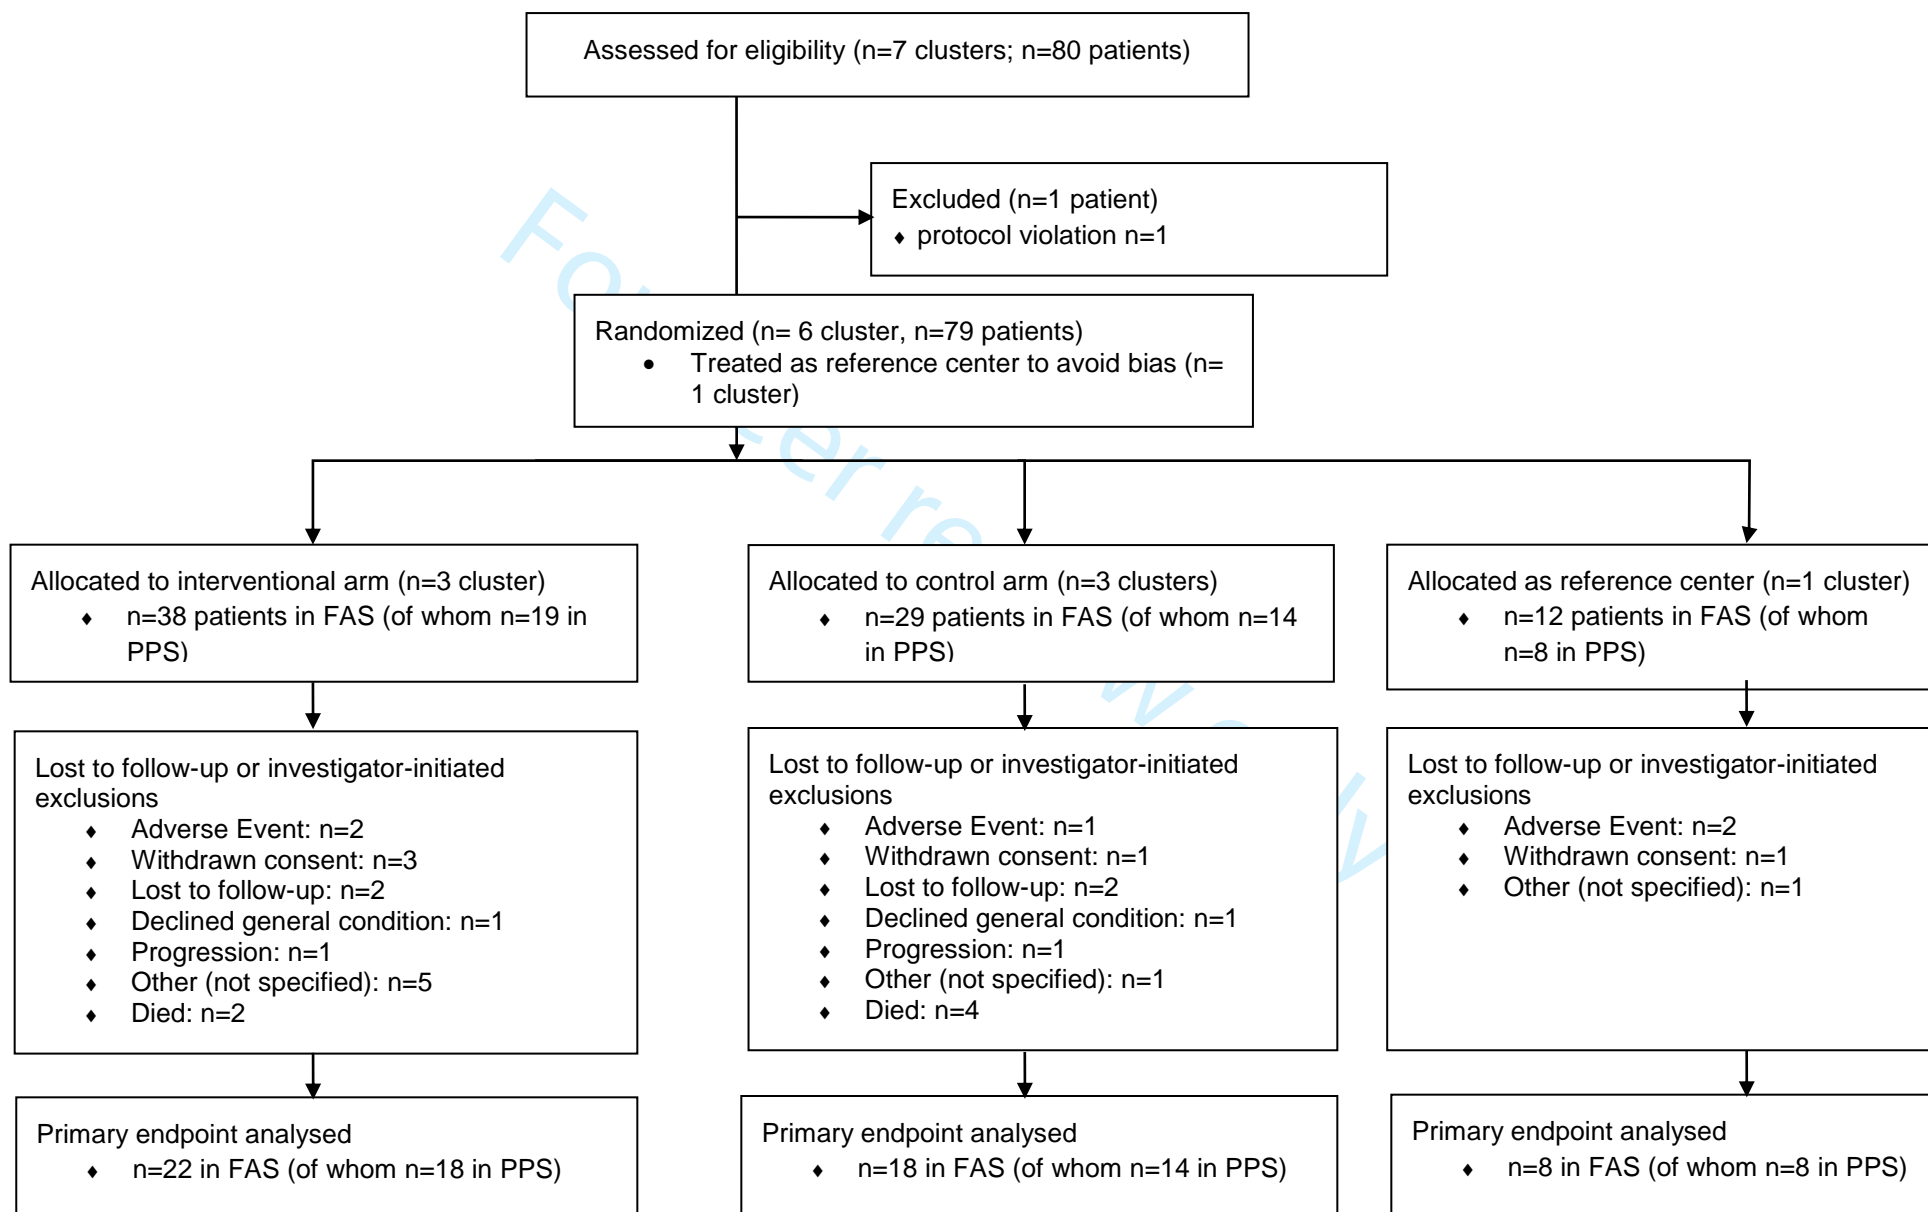

**Figure 2.** Absolute FACT-scores at baseline (V1), after nine weeks of treatment (V4; primary endpoint) and during follow up visit (V7)

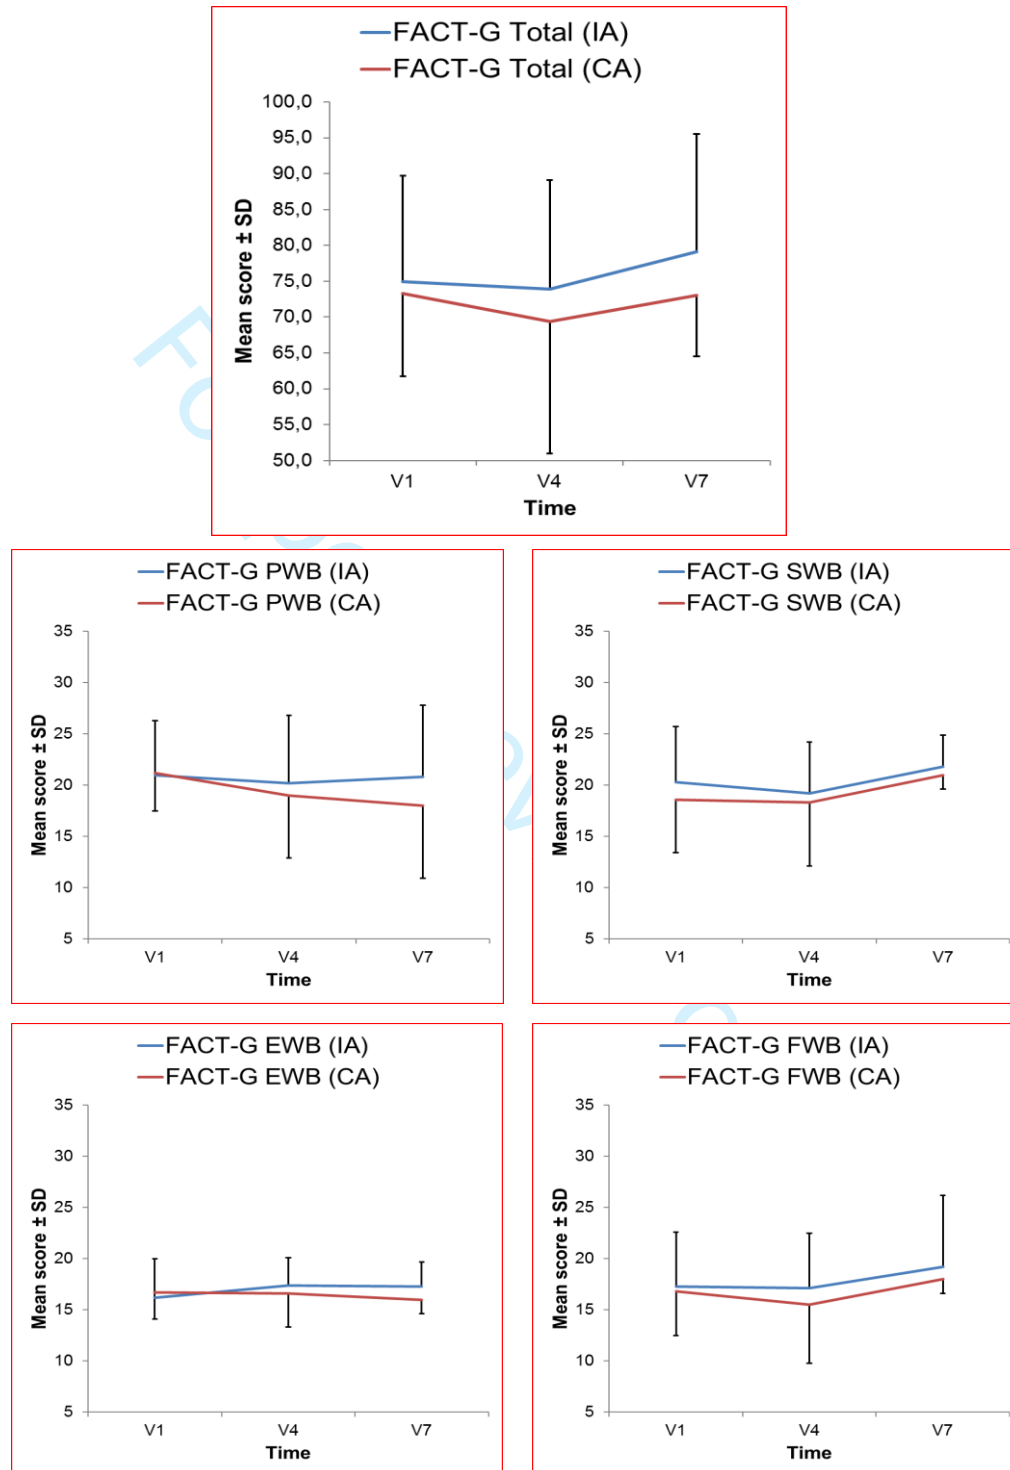

FACT-G, Functional Assessment for Cancer Therapy; EWB, emotional well-being; FWB, functional well-being; PWB, physical well-being; SD, standard deviation; SWB, social well-being; V, visit.

Number of evaluated patients for all FACT-G dimensions per visit and cohort: V1: IA N=19, CA N=14; V4: IA N=18, CA N=14; V7: IA N=9, CA N=2.

**Supplementary Table 1.** Absolute FACT-scores at each assessment time

| Questionnaire                     | Visit | Interventional arm (IA) |      |      | Control arm (CA) |      |      | <i>P</i> -value | Total |      | Effect size at V4<br>Cohen's d |
|-----------------------------------|-------|-------------------------|------|------|------------------|------|------|-----------------|-------|------|--------------------------------|
|                                   |       | N                       | Mean | SD   | N                | Mean | SD   |                 | Mean  | SD   |                                |
| <b>FACT-G total score</b>         | V1    | 19                      | 74.9 | 14.8 | 14               | 73.3 | 11.6 | 0.788           | 74.2  | 13.0 | 0,267                          |
|                                   | V2    | 18                      | 76.8 | 15.1 | 14               | 68.2 | 16.6 | 0.145           | 73.1  | 16.1 |                                |
|                                   | V3    | 18                      | 72.0 | 16.7 | 13               | 70.7 | 11.8 | 0.708           | 72.1  | 14.3 |                                |
|                                   | V4    | 18                      | 73.9 | 15.2 | 14               | 69.4 | 18.4 | 0.512           | 71.6  | 16.2 |                                |
|                                   | V5    | 13                      | 80.2 | 10.8 | 7                | 74.9 | 14.8 | 0.588           | 77.3  | 14.8 |                                |
|                                   | V6    | 14                      | 76.6 | 12.8 | 8                | 80.2 | 11.8 | 0.402           | 77.2  | 13.2 |                                |
|                                   | V7    | 9                       | 79.1 | 16.4 | 2                | 73.0 | 8.5  | 0.582           | 75.7  | 14.9 |                                |
| <b>FACT physical well-being</b>   | V1    | 19                      | 21.0 | 5.3  | 14               | 21.2 | 3.7  | 0.872           | 21.2  | 4.5  | 0,189                          |
|                                   | V2    | 18                      | 21.4 | 5.0  | 14               | 18.7 | 5.4  | 0.168           | 20.3  | 5.2  |                                |
|                                   | V3    | 18                      | 19.3 | 5.6  | 13               | 20.2 | 3.7  | 0.890           | 20.3  | 4.9  |                                |
|                                   | V4    | 18                      | 20.2 | 6.6  | 14               | 19.0 | 6.1  | 0.639           | 19.6  | 6.1  |                                |
|                                   | V5    | 14                      | 22.6 | 3.4  | 7                | 20.9 | 4.5  | 0.971           | 21.8  | 4.0  |                                |
|                                   | V6    | 14                      | 22.0 | 4.4  | 8                | 22.1 | 3.4  | 1.000           | 22.0  | 4.2  |                                |
|                                   | V7    | 9                       | 20.8 | 7.0  | 2                | 18.0 | 7.1  | 0.582           | 19.4  | 6.4  |                                |
| <b>FACT social well-being</b>     | V1    | 19                      | 20.3 | 5.4  | 14               | 18.6 | 5.2  | 0.304           | 19.8  | 5.2  | 0,161                          |
|                                   | V2    | 18                      | 20.5 | 4.6  | 14               | 17.7 | 6.0  | 0.251           | 19.6  | 5.2  |                                |
|                                   | V3    | 18                      | 19.5 | 4.6  | 13               | 17.9 | 4.6  | 0.395           | 19.2  | 4.5  |                                |
|                                   | V4    | 18                      | 19.2 | 5.0  | 14               | 18.3 | 6.2  | 0.896           | 19.3  | 5.3  |                                |
|                                   | V5    | 14                      | 20.9 | 3.9  | 7                | 20.4 | 5.1  | 0.913           | 20.5  | 4.5  |                                |
|                                   | V6    | 14                      | 20.7 | 2.7  | 8                | 22.2 | 3.2  | 0.188           | 21.2  | 3.2  |                                |
|                                   | V7    | 9                       | 21.8 | 3.1  | 2                | 21.0 | 1.4  | 0.727           | 21.3  | 3.8  |                                |
| <b>FACT emotional well-being</b>  | V1    | 19                      | 16.2 | 3.8  | 14               | 16.7 | 2.6  | 0.986           | 16.0  | 3.3  | 0,267                          |
|                                   | V2    | 18                      | 17.0 | 3.3  | 14               | 16.6 | 2.6  | 0.667           | 16.5  | 3.7  |                                |
|                                   | V3    | 18                      | 17.0 | 4.0  | 13               | 17.7 | 3.1  | 0.767           | 16.7  | 3.8  |                                |
|                                   | V4    | 18                      | 17.4 | 2.7  | 14               | 16.6 | 3.3  | 0.377           | 16.6  | 3.3  |                                |
|                                   | V5    | 13                      | 17.7 | 2.2  | 7                | 17.1 | 1.2  | 0.393           | 17.1  | 2.3  |                                |
|                                   | V6    | 14                      | 16.8 | 3.4  | 8                | 16.6 | 3.2  | 0.570           | 16.1  | 3.6  |                                |
|                                   | V7    | 9                       | 17.3 | 2.4  | 2                | 16.0 | 1.4  | 0.327           | 16.9  | 3.1  |                                |
| <b>FACT functional well-being</b> | V1    | 19                      | 17.3 | 5.3  | 14               | 16.8 | 4.3  | 0.900           | 17.2  | 4.5  | 0,288                          |
|                                   | V2    | 18                      | 17.9 | 5.4  | 14               | 15.1 | 5.9  | 0.319           | 16.7  | 5.4  |                                |
|                                   | V3    | 18                      | 16.1 | 6.4  | 13               | 14.9 | 4.5  | 0.679           | 16.0  | 5.4  |                                |
|                                   | V4    | 18                      | 17.1 | 5.4  | 14               | 15.5 | 5.7  | 0.512           | 16.2  | 5.4  |                                |
|                                   | V5    | 13                      | 18.8 | 4.6  | 7                | 16.4 | 5.3  | 0.485           | 17.9  | 4.5  |                                |
|                                   | V6    | 14                      | 17.1 | 6.1  | 8                | 19.3 | 3.8  | 0.441           | 17.9  | 5.4  |                                |
|                                   | V7    | 9                       | 19.2 | 7.0  | 2                | 18.0 | 1.4  | 0.909           | 18.0  | 6.0  |                                |

FACT-G, Functional Assessment for Cancer Therapy; SD, standard deviation; V, visit; N, number of patients



**Supplementary Table 2.** Absolute scores of secondary outcomes

| Questionnaire             | Visit | Interventional arm (IA) |      |      | Control arm (CA) |      |      | <i>P-value</i> | Total |      | Effect size at V4<br>Cohen's d |
|---------------------------|-------|-------------------------|------|------|------------------|------|------|----------------|-------|------|--------------------------------|
|                           |       | N                       | Mean | SD   | N                | Mean | SD   |                | Mean  | SD   |                                |
| <b>FAACT score</b>        |       |                         |      |      |                  |      |      |                |       |      |                                |
|                           | V1    | 19                      | 37,9 | 4,3  | 14               | 39,1 | 5,4  | 0,439          | 38,3  | 4,8  |                                |
|                           | V2    | 18                      | 37,9 | 5,2  | 14               | 39,1 | 6,0  | 0,398          | 38,7  | 5,3  |                                |
|                           | V3    | 18                      | 37,4 | 5,5  | 13               | 37,9 | 5,2  | 0,828          | 38,1  | 5,0  |                                |
|                           | V4    | 18                      | 35,0 | 6,7  | 14               | 38,6 | 7,1  | 0,099          | 36,9  | 6,4  | -0,522                         |
|                           | V5    | 13                      | 39,3 | 4,5  | 7                | 37,3 | 8,9  | 0,877          | 37,7  | 6,2  |                                |
|                           | V6    | 14                      | 38,3 | 4,7  | 8                | 40,3 | 4,3  | 0,365          | 38,6  | 4,8  |                                |
|                           | V7    | 9                       | 33,0 | 11,8 | 2                | 34,0 | 14,1 | 1,000          | 33,2  | 10,0 |                                |
| <b>MDASI severity</b>     |       |                         |      |      |                  |      |      |                |       |      |                                |
|                           | V1    | 19                      | 1,9  | 1,5  | 14               | 1,9  | 1,5  | 1,000          | 2,0   | 1,4  |                                |
|                           | V2    | 18                      | 2,0  | 1,5  | 14               | 2,5  | 1,6  | 0,464          | 2,2   | 1,6  |                                |
|                           | V3    | 18                      | 2,5  | 1,4  | 13               | 2,0  | 1,0  | 0,417          | 2,2   | 1,3  |                                |
|                           | V4    | 18                      | 2,4  | 1,6  | 14               | 2,1  | 1,6  | 0,561          | 2,2   | 1,6  | 0,188                          |
|                           | V5    | 13                      | 2,0  | 0,9  | 7                | 2,7  | 1,6  | 0,588          | 2,1   | 1,3  |                                |
|                           | V6    | 14                      | 2,1  | 1,2  | 8                | 2,4  | 1,7  | 0,868          | 2,2   | 1,5  |                                |
|                           | V7    | 9                       | 2,5  | 1,6  | 2                | 2,2  | 1,7  | 1,000          | 2,6   | 1,9  |                                |
| <b>MDASI interference</b> |       |                         |      |      |                  |      |      |                |       |      |                                |
|                           | V1    | 19                      | 1,9  | 2,1  | 14               | 2,2  | 1,6  | 0,397          | 2,1   | 2,0  |                                |
|                           | V2    | 18                      | 2,2  | 2,0  | 14               | 3,4  | 1,9  | 0,065          | 2,6   | 2,0  |                                |
|                           | V3    | 18                      | 2,8  | 2,3  | 13               | 2,9  | 1,6  | 0,798          | 2,8   | 2,0  |                                |
|                           | V4    | 18                      | 3,0  | 2,1  | 14               | 2,9  | 2,2  | 0,837          | 2,9   | 2,2  | 0,047                          |
|                           | V5    | 13                      | 2,2  | 1,8  | 7                | 2,8  | 2,3  | 0,588          | 2,2   | 1,8  |                                |
|                           | V6    | 14                      | 2,3  | 1,7  | 8                | 2,9  | 1,9  | 0,570          | 2,4   | 1,8  |                                |
|                           | V7    | 9                       | 0,6  | 2,6  | 2                | 3,3  | 3,1  | 1,000          | 2,9   | 2,6  |                                |

FAACT, Functional Assessment of Anorexia/Cachexia Therapy questionnaire; MDASI, The M.D. Anderson Symptom Inventory; SD, standard deviation; V, visit; N, number of patients.

**Table 1: CONSORT 2010 checklist of information to include when reporting a cluster randomised trial**

| Section/Topic                    | Item No | Standard Checklist item                                                                                                                | Extension for cluster designs                                                                 | Page No *        |
|----------------------------------|---------|----------------------------------------------------------------------------------------------------------------------------------------|-----------------------------------------------------------------------------------------------|------------------|
| <b>Title and abstract</b>        |         |                                                                                                                                        |                                                                                               |                  |
|                                  | 1a      | Identification as a randomised trial in the title                                                                                      | Identification as a cluster randomised trial in the title                                     | Yes, p.1         |
|                                  | 1b      | Structured summary of trial design, methods, results, and conclusions (for specific guidance see CONSORT for abstracts) <sup>1,2</sup> | See table 2                                                                                   | Yes, p. 2-3      |
| <b>Introduction</b>              |         |                                                                                                                                        |                                                                                               |                  |
| <b>Background and objectives</b> | 2a      | Scientific background and explanation of rationale                                                                                     | Rationale for using a cluster design                                                          | Yes, 5-7 and p10 |
|                                  | 2b      | Specific objectives or hypotheses                                                                                                      | Whether objectives pertain to the the cluster level, the individual participant level or both | Yes, p.8-9       |
| <b>Methods</b>                   |         |                                                                                                                                        |                                                                                               |                  |
| <b>Trial design</b>              | 3a      | Description of trial design (such as parallel, factorial) including allocation ratio                                                   | Definition of cluster and description of how the design features apply to the clusters        | Yes, p.8         |
|                                  | 3b      | Important changes to methods after trial commencement (such as eligibility criteria), with reasons                                     |                                                                                               | Not applicable   |
| <b>Participants</b>              | 4a      | Eligibility criteria for participants                                                                                                  | Eligibility criteria for clusters                                                             | Yes, p.8         |
|                                  | 4b      | Settings and locations where the data were collected                                                                                   |                                                                                               | Yes, p.8         |
| <b>Interventions</b>             | 5       | The interventions for each group with sufficient details to allow replication, including how and when they were actually administered  | Whether interventions pertain to the cluster level, the individual participant level or both  | Yes, p.9         |

|                                         |     |                                                                                                                                                                                             |                                                                                                                                                                                                                    |                |
|-----------------------------------------|-----|---------------------------------------------------------------------------------------------------------------------------------------------------------------------------------------------|--------------------------------------------------------------------------------------------------------------------------------------------------------------------------------------------------------------------|----------------|
| <b>Outcomes</b>                         | 6a  | Completely defined pre-specified primary and secondary outcome measures, including how and when they were assessed                                                                          | Whether outcome measures pertain to the cluster level, the individual participant level or both                                                                                                                    | Yes, 10-12     |
|                                         | 6b  | Any changes to trial outcomes after the trial commenced, with reasons                                                                                                                       |                                                                                                                                                                                                                    | Not applicable |
| <b>Sample size</b>                      | 7a  | How sample size was determined                                                                                                                                                              | Method of calculation, number of clusters(s) (and whether equal or unequal cluster sizes are assumed), cluster size, a coefficient of intracluster correlation (ICC or $k$ ), and an indication of its uncertainty | Yes, 12-13     |
|                                         | 7b  | When applicable, explanation of any interim analyses and stopping guidelines                                                                                                                |                                                                                                                                                                                                                    | Not applicable |
| <b>Randomisation:</b>                   |     |                                                                                                                                                                                             |                                                                                                                                                                                                                    |                |
| <b>Sequence generation</b>              | 8a  | Method used to generate the random allocation sequence                                                                                                                                      |                                                                                                                                                                                                                    | Yes, p.10      |
|                                         | 8b  | Type of randomisation; details of any restriction (such as blocking and block size)                                                                                                         | Details of stratification or matching if used                                                                                                                                                                      | Yes, p.10      |
| <b>Allocation concealment mechanism</b> | 9   | Mechanism used to implement the random allocation sequence (such as sequentially numbered containers), describing any steps taken to conceal the sequence until interventions were assigned | Specification that allocation was based on clusters rather than individuals and whether allocation concealment (if any) was at the cluster level, the individual participant level or both                         | Yes, p. 10     |
| <b>Implementation</b>                   | 10  | Who generated the random allocation sequence, who enrolled participants, and who assigned participants to interventions                                                                     | Replace by 10a, 10b and 10c                                                                                                                                                                                        | Yes            |
|                                         | 10a |                                                                                                                                                                                             | Who generated the random allocation sequence, who                                                                                                                                                                  | Yes            |

|                            |     |                                                                                                                                                                     |                                                                                                                                                              |
|----------------------------|-----|---------------------------------------------------------------------------------------------------------------------------------------------------------------------|--------------------------------------------------------------------------------------------------------------------------------------------------------------|
|                            |     | enrolled clusters, and who assigned clusters to interventions                                                                                                       |                                                                                                                                                              |
|                            | 10b | Mechanism by which individual participants were included in clusters for the purposes of the trial (such as complete enumeration, random sampling)                  | Yes                                                                                                                                                          |
|                            | 10c | From whom consent was sought (representatives of the cluster, or individual cluster members, or both), and whether consent was sought before or after randomisation | Yes                                                                                                                                                          |
| <b>Blinding</b>            |     |                                                                                                                                                                     |                                                                                                                                                              |
|                            | 11a | If done, who was blinded after assignment to interventions (for example, participants, care providers, those assessing outcomes) and how                            | Not done                                                                                                                                                     |
|                            | 11b | If relevant, description of the similarity of interventions                                                                                                         | Not applicable                                                                                                                                               |
| <b>Statistical methods</b> |     |                                                                                                                                                                     |                                                                                                                                                              |
|                            | 12a | Statistical methods used to compare groups for primary and secondary outcomes                                                                                       | How clustering was taken into account<br>Yes, p.12                                                                                                           |
|                            | 12b | Methods for additional analyses, such as subgroup analyses and adjusted analyses                                                                                    | Yes, p.12                                                                                                                                                    |
| <b>Results</b>             |     |                                                                                                                                                                     |                                                                                                                                                              |
|                            | 13a | For each group, the numbers of participants who were randomly assigned, received intended treatment, and were analysed for the primary outcome                      | For each group, the numbers of clusters that were randomly assigned, received intended treatment, and were analysed for the primary outcome<br>Yes, figure 1 |
|                            | 13b | For each group, losses and exclusions after randomisation, together with reasons                                                                                    | For each group, losses and exclusions for both clusters and individual cluster members<br>Yes, figure 1                                                      |

|                                |     |                                                                                                                                                   |                                                                                                                                            |                |
|--------------------------------|-----|---------------------------------------------------------------------------------------------------------------------------------------------------|--------------------------------------------------------------------------------------------------------------------------------------------|----------------|
| <b>Recruitment</b>             | 14a | Dates defining the periods of recruitment and follow-up                                                                                           |                                                                                                                                            | Yes, p.9       |
|                                | 14b | Why the trial ended or was stopped                                                                                                                |                                                                                                                                            | Yes            |
| <b>Baseline data</b>           | 15  | A table showing baseline demographic and clinical characteristics for each group                                                                  | Baseline characteristics for the individual and cluster levels as applicable for each group                                                | Yes, table 2   |
| <b>Numbers analysed</b>        | 16  | For each group, number of participants (denominator) included in each analysis and whether the analysis was by original assigned groups           | For each group, number of clusters included in each analysis                                                                               | Yes            |
| <b>Outcomes and estimation</b> | 17a | For each primary and secondary outcome, results for each group, and the estimated effect size and its precision (such as 95% confidence interval) | Results at the individual or cluster level as applicable and a coefficient of intracluster correlation (ICC or k) for each primary outcome | Yes            |
|                                | 17b | For binary outcomes, presentation of both absolute and relative effect sizes is recommended                                                       |                                                                                                                                            | Yes            |
| <b>Ancillary analyses</b>      | 18  | Results of any other analyses performed, including subgroup analyses and adjusted analyses, distinguishing pre-specified from exploratory         |                                                                                                                                            | Yes            |
| <b>Harms</b>                   | 19  | All important harms or unintended effects in each group (for specific guidance see CONSORT for harms <sup>3</sup> )                               |                                                                                                                                            | Not applicable |
| <b>Discussion</b>              |     |                                                                                                                                                   |                                                                                                                                            |                |
| <b>Limitations</b>             | 20  | Trial limitations, addressing sources of potential bias, imprecision, and, if relevant, multiplicity of analyses                                  |                                                                                                                                            | Yes, p. 17-18  |
| <b>Generalisability</b>        | 21  | Generalisability (external validity, applicability) of the trial findings                                                                         | Generalisability to clusters and/or individual participants (as relevant)                                                                  | Yes            |

|                          |    |                                                                                                               |              |
|--------------------------|----|---------------------------------------------------------------------------------------------------------------|--------------|
| <b>Interpretation</b>    | 22 | Interpretation consistent with results, balancing benefits and harms, and considering other relevant evidence | Yes, p.16-17 |
| <b>Other information</b> |    |                                                                                                               |              |
| <b>Registration</b>      | 23 | Registration number and name of trial registry                                                                | Yes, p.3     |
| <b>Protocol</b>          | 24 | Where the full trial protocol can be accessed, if available                                                   | Yes, p.8     |
| <b>Funding</b>           | 25 | Sources of funding and other support (such as supply of drugs), role of funders                               | Yes, p.19    |

\* Note: page numbers optional depending on journal requirements

**Table 2: Extension of CONSORT for abstracts<sup>1,2</sup> to reports of cluster randomised trials**

| Item                      | Standard Checklist item                                                                                     | Extension for cluster trials                                                                                   |
|---------------------------|-------------------------------------------------------------------------------------------------------------|----------------------------------------------------------------------------------------------------------------|
| <b>Title</b>              | Identification of study as randomised                                                                       | <b>Identification of study as cluster randomised</b>                                                           |
| <b>Trial design</b>       | Description of the trial design (e.g. parallel, cluster, non-inferiority)                                   |                                                                                                                |
| <b>Methods</b>            |                                                                                                             |                                                                                                                |
| <b>Participants</b>       | Eligibility criteria for participants and the settings where the data were collected                        | <b>Eligibility criteria for clusters</b>                                                                       |
| <b>Interventions</b>      | Interventions intended for each group                                                                       |                                                                                                                |
| <b>Objective</b>          | Specific objective or hypothesis                                                                            | <b>Whether objective or hypothesis pertains to the cluster level, the individual participant level or both</b> |
| <b>Outcome</b>            | Clearly defined primary outcome for this report                                                             | <b>Whether the primary outcome pertains to the cluster level, the individual participant level or both</b>     |
| <b>Randomization</b>      | How participants were allocated to interventions                                                            | <b>How clusters were allocated to interventions</b>                                                            |
| <b>Blinding (masking)</b> | Whether or not participants, care givers, and those assessing the outcomes were blinded to group assignment |                                                                                                                |
| <b>Results</b>            |                                                                                                             |                                                                                                                |
| <b>Numbers randomized</b> | Number of participants randomized to each group                                                             | <b>Number of clusters randomized to each group</b>                                                             |
| <b>Recruitment</b>        | Trial status <sup>1</sup>                                                                                   |                                                                                                                |
| <b>Numbers analysed</b>   | Number of participants analysed in each group                                                               | <b>Number of clusters analysed in each group</b>                                                               |
| <b>Outcome</b>            | For the primary outcome, a result for each group and the estimated effect size and its precision            | <b>Results at the cluster or individual participant level as applicable for each primary outcome</b>           |
| <b>Harms</b>              | Important adverse events or side effects                                                                    |                                                                                                                |
| <b>Conclusions</b>        | General interpretation of the results                                                                       |                                                                                                                |
| <b>Trial registration</b> | Registration number and name of trial register                                                              |                                                                                                                |
| <b>Funding</b>            | Source of funding                                                                                           |                                                                                                                |

<sup>1</sup> Relevant to Conference Abstracts

## REFERENCES

---

- 1 Hopewell S, Clarke M, Moher D, Wager E, Middleton P, Altman DG, et al. CONSORT for reporting randomised trials in journal and conference abstracts. *Lancet* 2008, 371:281-283
- 2 Hopewell S, Clarke M, Moher D, Wager E, Middleton P, Altman DG at al (2008) CONSORT for reporting randomized controlled trials in journal and conference abstracts: explanation and elaboration. *PLoS Med* 5(1): e20
- 3 Ioannidis JP, Evans SJ, Gotzsche PC, O'Neill RT, Altman DG, Schulz K, Moher D. Better reporting of harms in randomized trials: an extension of the CONSORT statement. *Ann Intern Med* 2004; 141(10):781-788.

For peer review only
