# Supplementary material for: Quality of life and added value of a tailored palliative care intervention in patients with soft tissue sarcoma undergoing treatment with trabectedin: a multicentre, cluster-randomised trial within the German Interdisciplinary Sarcoma Group (GISG)
Source: PubMed Central journal article supplement — BMJ Open. 2020 Aug 27;10(8):e035546. doi: 10.1136/bmjopen-2019-035546 (PMC7454199; doi:10.1136/bmjopen-2019-035546), 2020-08-27
Supplement: bmjopen-2019-035546supp001.pdf [file bmjopen-2019-035546supp001.pdf]

**Supplementary Table 1.** Absolute FACT-scores at each assessment time

| Questionnaire                     | Visit | Interventional arm (IA) |      |      | Control arm (CA) |      |      | <i>P</i> -value | Total |      | Effect size at V4<br>Cohen's d |
|-----------------------------------|-------|-------------------------|------|------|------------------|------|------|-----------------|-------|------|--------------------------------|
|                                   |       | N                       | Mean | SD   | N                | Mean | SD   |                 | Mean  | SD   |                                |
| <b>FACT-G total score</b>         | V1    | 19                      | 74.9 | 14.8 | 14               | 73.3 | 11.6 | 0.788           | 74.2  | 13.0 | 0,267                          |
|                                   | V2    | 18                      | 76.8 | 15.1 | 14               | 68.2 | 16.6 | 0.145           | 73.1  | 16.1 |                                |
|                                   | V3    | 18                      | 72.0 | 16.7 | 13               | 70.7 | 11.8 | 0.708           | 72.1  | 14.3 |                                |
|                                   | V4    | 18                      | 73.9 | 15.2 | 14               | 69.4 | 18.4 | 0.512           | 71.6  | 16.2 |                                |
|                                   | V5    | 13                      | 80.2 | 10.8 | 7                | 74.9 | 14.8 | 0.588           | 77.3  | 14.8 |                                |
|                                   | V6    | 14                      | 76.6 | 12.8 | 8                | 80.2 | 11.8 | 0.402           | 77.2  | 13.2 |                                |
|                                   | V7    | 9                       | 79.1 | 16.4 | 2                | 73.0 | 8.5  | 0.582           | 75.7  | 14.9 |                                |
| <b>FACT physical well-being</b>   | V1    | 19                      | 21.0 | 5.3  | 14               | 21.2 | 3.7  | 0.872           | 21.2  | 4.5  | 0,189                          |
|                                   | V2    | 18                      | 21.4 | 5.0  | 14               | 18.7 | 5.4  | 0.168           | 20.3  | 5.2  |                                |
|                                   | V3    | 18                      | 19.3 | 5.6  | 13               | 20.2 | 3.7  | 0.890           | 20.3  | 4.9  |                                |
|                                   | V4    | 18                      | 20.2 | 6.6  | 14               | 19.0 | 6.1  | 0.639           | 19.6  | 6.1  |                                |
|                                   | V5    | 14                      | 22.6 | 3.4  | 7                | 20.9 | 4.5  | 0.971           | 21.8  | 4.0  |                                |
|                                   | V6    | 14                      | 22.0 | 4.4  | 8                | 22.1 | 3.4  | 1.000           | 22.0  | 4.2  |                                |
|                                   | V7    | 9                       | 20.8 | 7.0  | 2                | 18.0 | 7.1  | 0.582           | 19.4  | 6.4  |                                |
| <b>FACT social well-being</b>     | V1    | 19                      | 20.3 | 5.4  | 14               | 18.6 | 5.2  | 0.304           | 19.8  | 5.2  | 0,161                          |
|                                   | V2    | 18                      | 20.5 | 4.6  | 14               | 17.7 | 6.0  | 0.251           | 19.6  | 5.2  |                                |
|                                   | V3    | 18                      | 19.5 | 4.6  | 13               | 17.9 | 4.6  | 0.395           | 19.2  | 4.5  |                                |
|                                   | V4    | 18                      | 19.2 | 5.0  | 14               | 18.3 | 6.2  | 0.896           | 19.3  | 5.3  |                                |
|                                   | V5    | 14                      | 20.9 | 3.9  | 7                | 20.4 | 5.1  | 0.913           | 20.5  | 4.5  |                                |
|                                   | V6    | 14                      | 20.7 | 2.7  | 8                | 22.2 | 3.2  | 0.188           | 21.2  | 3.2  |                                |
|                                   | V7    | 9                       | 21.8 | 3.1  | 2                | 21.0 | 1.4  | 0.727           | 21.3  | 3.8  |                                |
| <b>FACT emotional well-being</b>  | V1    | 19                      | 16.2 | 3.8  | 14               | 16.7 | 2.6  | 0.986           | 16.0  | 3.3  | 0,267                          |
|                                   | V2    | 18                      | 17.0 | 3.3  | 14               | 16.6 | 2.6  | 0.667           | 16.5  | 3.7  |                                |
|                                   | V3    | 18                      | 17.0 | 4.0  | 13               | 17.7 | 3.1  | 0.767           | 16.7  | 3.8  |                                |
|                                   | V4    | 18                      | 17.4 | 2.7  | 14               | 16.6 | 3.3  | 0.377           | 16.6  | 3.3  |                                |
|                                   | V5    | 13                      | 17.7 | 2.2  | 7                | 17.1 | 1.2  | 0.393           | 17.1  | 2.3  |                                |
|                                   | V6    | 14                      | 16.8 | 3.4  | 8                | 16.6 | 3.2  | 0.570           | 16.1  | 3.6  |                                |
|                                   | V7    | 9                       | 17.3 | 2.4  | 2                | 16.0 | 1.4  | 0.327           | 16.9  | 3.1  |                                |
| <b>FACT functional well-being</b> | V1    | 19                      | 17.3 | 5.3  | 14               | 16.8 | 4.3  | 0.900           | 17.2  | 4.5  | 0,288                          |
|                                   | V2    | 18                      | 17.9 | 5.4  | 14               | 15.1 | 5.9  | 0.319           | 16.7  | 5.4  |                                |
|                                   | V3    | 18                      | 16.1 | 6.4  | 13               | 14.9 | 4.5  | 0.679           | 16.0  | 5.4  |                                |
|                                   | V4    | 18                      | 17.1 | 5.4  | 14               | 15.5 | 5.7  | 0.512           | 16.2  | 5.4  |                                |
|                                   | V5    | 13                      | 18.8 | 4.6  | 7                | 16.4 | 5.3  | 0.485           | 17.9  | 4.5  |                                |
|                                   | V6    | 14                      | 17.1 | 6.1  | 8                | 19.3 | 3.8  | 0.441           | 17.9  | 5.4  |                                |
|                                   | V7    | 9                       | 19.2 | 7.0  | 2                | 18.0 | 1.4  | 0.909           | 18.0  | 6.0  |                                |

FACT-G, Functional Assessment for Cancer Therapy; SD, standard deviation; V, visit; N, number of patients
