# Supplementary material for: Quality of life and added value of a tailored palliative care intervention in patients with soft tissue sarcoma undergoing treatment with trabectedin: a multicentre, cluster-randomised trial within the German Interdisciplinary Sarcoma Group (GISG)
Source: PubMed Central journal article supplement — BMJ Open. 2020 Aug 27;10(8):e035546. doi: 10.1136/bmjopen-2019-035546 (PMC7454199; doi:10.1136/bmjopen-2019-035546), 2020-08-27
Supplement: bmjopen-2019-035546supp002.pdf [file bmjopen-2019-035546supp002.pdf]

**Supplementary Table 2.** Absolute scores of secondary outcomes

| Questionnaire             | Visit | Interventional arm (IA) |      |      | Control arm (CA) |      |      | <i>P</i> -value | Total |      | Effect size at V4<br>Cohen's d |
|---------------------------|-------|-------------------------|------|------|------------------|------|------|-----------------|-------|------|--------------------------------|
|                           |       | N                       | Mean | SD   | N                | Mean | SD   |                 | Mean  | SD   |                                |
| <b>FAACT score</b>        |       |                         |      |      |                  |      |      |                 |       |      |                                |
|                           | V1    | 19                      | 37,9 | 4,3  | 14               | 39,1 | 5,4  | 0,439           | 38,3  | 4,8  |                                |
|                           | V2    | 18                      | 37,9 | 5,2  | 14               | 39,1 | 6,0  | 0,398           | 38,7  | 5,3  |                                |
|                           | V3    | 18                      | 37,4 | 5,5  | 13               | 37,9 | 5,2  | 0,828           | 38,1  | 5,0  |                                |
|                           | V4    | 18                      | 35,0 | 6,7  | 14               | 38,6 | 7,1  | 0,099           | 36,9  | 6,4  | -0,522                         |
|                           | V5    | 13                      | 39,3 | 4,5  | 7                | 37,3 | 8,9  | 0,877           | 37,7  | 6,2  |                                |
|                           | V6    | 14                      | 38,3 | 4,7  | 8                | 40,3 | 4,3  | 0,365           | 38,6  | 4,8  |                                |
|                           | V7    | 9                       | 33,0 | 11,8 | 2                | 34,0 | 14,1 | 1,000           | 33,2  | 10,0 |                                |
| <b>MDASI severity</b>     |       |                         |      |      |                  |      |      |                 |       |      |                                |
|                           | V1    | 19                      | 1,9  | 1,5  | 14               | 1,9  | 1,5  | 1,000           | 2,0   | 1,4  |                                |
|                           | V2    | 18                      | 2,0  | 1,5  | 14               | 2,5  | 1,6  | 0,464           | 2,2   | 1,6  |                                |
|                           | V3    | 18                      | 2,5  | 1,4  | 13               | 2,0  | 1,0  | 0,417           | 2,2   | 1,3  |                                |
|                           | V4    | 18                      | 2,4  | 1,6  | 14               | 2,1  | 1,6  | 0,561           | 2,2   | 1,6  | 0,188                          |
|                           | V5    | 13                      | 2,0  | 0,9  | 7                | 2,7  | 1,6  | 0,588           | 2,1   | 1,3  |                                |
|                           | V6    | 14                      | 2,1  | 1,2  | 8                | 2,4  | 1,7  | 0,868           | 2,2   | 1,5  |                                |
|                           | V7    | 9                       | 2,5  | 1,6  | 2                | 2,2  | 1,7  | 1,000           | 2,6   | 1,9  |                                |
| <b>MDASI interference</b> |       |                         |      |      |                  |      |      |                 |       |      |                                |
|                           | V1    | 19                      | 1,9  | 2,1  | 14               | 2,2  | 1,6  | 0,397           | 2,1   | 2,0  |                                |
|                           | V2    | 18                      | 2,2  | 2,0  | 14               | 3,4  | 1,9  | 0,065           | 2,6   | 2,0  |                                |
|                           | V3    | 18                      | 2,8  | 2,3  | 13               | 2,9  | 1,6  | 0,798           | 2,8   | 2,0  |                                |
|                           | V4    | 18                      | 3,0  | 2,1  | 14               | 2,9  | 2,2  | 0,837           | 2,9   | 2,2  | 0,047                          |
|                           | V5    | 13                      | 2,2  | 1,8  | 7                | 2,8  | 2,3  | 0,588           | 2,2   | 1,8  |                                |
|                           | V6    | 14                      | 2,3  | 1,7  | 8                | 2,9  | 1,9  | 0,570           | 2,4   | 1,8  |                                |
|                           | V7    | 9                       | 0,6  | 2,6  | 2                | 3,3  | 3,1  | 1,000           | 2,9   | 2,6  |                                |

FAACT, Functional Assessment of Anorexia/Cachexia Therapy questionnaire; MDASI, The M.D. Anderson Symptom Inventory; SD, standard deviation; V, visit; N, number of patients.
